# Supplementary material for: The Effect of Neurotoxin MPTP and Neuroprotector Isatin on the Profile of Ubiquitinated Brain Mitochondrial Proteins
Source: Cells. 2018 Jul 31;7(8):91. doi: 10.3390/cells7080091 (PMC6115780; doi:10.3390/cells7080091)
Supplement: Supplementary file 1 [file cells-07-00091-s001.xlsx]

## Sheet: Complete proteome Control
Sample ID	Main Accession	Description	Ensembl Gene ID	Gene Name	Chromosome	GO Accession	GO Description	MW [kDa]	Possible Coverage [%]	Coverage [%]	Confident Coverage [%]	Spectrum Counting	Spectrum Counting NSAF	Spectrum Counting emPAI	Spectrum Counting NSAF [%]	Spectrum Counting emPAI [%]	#Peptides	#Unique	#PSMs	Score	Confidence [%]	Validation
C01R01	Q99JB2	Stomatin-like protein 2, mitochondrial (STML2_MOUSE)	ENSMUSG00000028455	Stoml2	4	GO:0006461, GO:0022607, GO:0043167, GO:0008289, GO:0009058, GO:0043226, GO:0005575, GO:0003674, GO:0044281, GO:0005623, GO:0051604, GO:0034641, GO:0008150, GO:0061024, GO:0055085, GO:0065003, GO:0007165, GO:0043234, GO:0006259, GO:0006810, GO:0005622, GO:0002376, GO:0005886, GO:0006950, GO:0007005, GO:0005634, GO:0005856, GO:0005737, GO:0042592, GO:0005739, GO:0006629, GO:0019899	protein maturation, cellular component assembly, cellular_component, cell, protein complex, molecular_function, cytoplasm, ion binding, cellular nitrogen compound metabolic process, biosynthetic process, membrane organization, immune system process, homeostatic process, enzyme binding, mitochondrion organization, dna metabolic process, biological_process, signal transduction, plasma membrane, cyt…	38.3612	75.35	4.25	4.25	14.321	0.00566572	0.0525003	0.022816	0.21142	1	1	2	Infinity	99.6753	Doubtful
C01R01	O55042	Alpha-synuclein (SYUA_MOUSE)	ENSMUSG00000025889	Snca	6	GO:0007010, GO:0022607, GO:0005794, GO:0043226, GO:0044281, GO:0005623, GO:0008219, GO:0016491, GO:0006914, GO:0005829, GO:0008150, GO:0006091, GO:0065003, GO:0007267, GO:0005840, GO:0006810, GO:0005886, GO:0002376, GO:0005635, GO:0005634, GO:0042393, GO:0042592, GO:0006461, GO:0040011, GO:0009056, GO:0043167, GO:0048856, GO:0006464, GO:0008289, GO:0009058, GO:0005576, GO:0005575, GO:0003674, GO:…	cell-cell signaling, cellular component assembly, molecular_function, enzyme regulator activity, immune system process, extracellular space, homeostatic process, enzyme binding, catabolic process, autophagy, cofactor metabolic process, signal transduction, cytoskeleton, organelle, nuclear envelope, macromolecular complex assembly, mitochondrion, generation of precursor metabolites and energy, res…	14.4762	72.14	52.14	52.14	549.561	0.21742	2.16228	0.875553	8.70754	9	6	60	Infinity	99.6753	Confident
C01R01	Q9CWZ7	Gamma-soluble NSF attachment protein (SNAG_MOUSE)	ENSMUSG00000024581	Napg	18	GO:0008150, GO:0061024, GO:0043234, GO:0043226, GO:0006810, GO:0005773, GO:0005575, GO:0003674, GO:0005622, GO:0005623, GO:0016192, GO:0005737, GO:0005739	vacuole, biological_process, organelle, transport, protein complex, cellular_component, cell, molecular_function, mitochondrion, cytoplasm, membrane organization, intracellular, vesicle-mediated transport	34.7103	76.92	35.9	32.37	141.06	0.0558069	0.701254	0.224735	2.82397	10	10	56	Infinity	99.6753	Confident
C01R01	P48962	ADP/ATP translocase 1 (ADT1_MOUSE)	ENSMUSG00000031633	Slc25a4	8	GO:0061024, GO:0008150, GO:0055085, GO:0022857, GO:0043226, GO:0005575, GO:0006810, GO:0003674, GO:0005622, GO:0007005, GO:0005623, GO:0008219, GO:0005737, GO:0005739	mitochondrion organization, cell death, biological_process, transmembrane transporter activity, organelle, transport, cellular_component, cell, molecular_function, mitochondrion, cytoplasm, transmembrane transport, membrane organization, intracellular	32.8831	81.21	46.31	40.94	204.75	0.0810041	2.16228	0.326205	8.70754	22	10	119	Infinity	99.6753	Confident
C01R01	Q61425	Hydroxyacyl-coenzyme A dehydrogenase, mitochondrial (HCDH_MOUSE)	ENSMUSG00000027984	Hadh	3	GO:0008150, GO:0009056, GO:0007267, GO:0043167, GO:0043226, GO:0006810, GO:0005575, GO:0005622, GO:0003674, GO:0005654, GO:0044281, GO:0005623, GO:0005634, GO:0005737, GO:0016491, GO:0006629, GO:0005739	catabolic process, nucleoplasm, biological_process, cell-cell signaling, organelle, nucleus, transport, cellular_component, cell, molecular_function, mitochondrion, cytoplasm, ion binding, small molecule metabolic process, lipid metabolic process, oxidoreductase activity, intracellular	34.4419	61.15	3.5	3.5	82.1259	0.032491	0.0608184	0.130842	0.244917	2	2	12	Infinity	99.6753	Doubtful
C01R01	Q99JR1	Sideroflexin-1 (SFXN1_MOUSE)	ENSMUSG00000021474	Sfxn1	13	GO:0008150, GO:0055085, GO:0022857, GO:0048856, GO:0043226, GO:0005575, GO:0006810, GO:0005622, GO:0002376, GO:0003674, GO:0005623, GO:0005737, GO:0042592, GO:0005739, GO:0030154	cell differentiation, biological_process, transmembrane transporter activity, organelle, transport, cellular_component, cell, molecular_function, mitochondrion, cytoplasm, transmembrane transport, immune system process, homeostatic process, anatomical structure development, intracellular	35.6263	79.81	28.26	28.26	78.1901	0.0309339	0.654817	0.124571	2.63696	10	8	25	Infinity	99.6753	Confident
C01R01	O08749	Dihydrolipoyl dehydrogenase, mitochondrial (DLDH_MOUSE)	ENSMUSG00000020664	Dld	12	GO:0009790, GO:0048856, GO:0006464, GO:0043167, GO:0009058, GO:0043226, GO:0005773, GO:0005575, GO:0003674, GO:0005654, GO:0044281, GO:0005623, GO:0016491, GO:0051186, GO:0005929, GO:0031410, GO:0034641, GO:0008150, GO:0006091, GO:0006790, GO:0021700, GO:0043234, GO:0007568, GO:0005622, GO:0000003, GO:0005634, GO:0005737, GO:0042592, GO:0005739, GO:0006629, GO:0030154	nucleoplasm, cell differentiation, embryo development, cellular_component, cell, protein complex, molecular_function, developmental maturation, cytoplasm, cilium, ion binding, cellular nitrogen compound metabolic process, biosynthetic process, sulfur compound metabolic process, homeostatic process, cofactor metabolic process, vacuole, biological_process, organelle, nucleus, mitochondrion, cytopla…	54.2382	69.35	18.27	13.56	45.9858	0.0181931	0.29155	0.0732639	1.17408	12	12	29	Infinity	99.6753	Confident
C01R01	Q9CXV1	Succinate dehydrogenase [ubiquinone] cytochrome b small subunit, mitochondrial (DHSD_MOUSE)	ENSMUSG00000000171	Sdhd	9	GO:0008150, GO:0006091, GO:0043167, GO:0043234, GO:0043226, GO:0005575, GO:0006810, GO:0003674, GO:0005622, GO:0006950, GO:0044281, GO:0005623, GO:0005737, GO:0016491, GO:0005739, GO:0034641	biological_process, organelle, transport, protein complex, cellular_component, cell, molecular_function, mitochondrion, cytoplasm, ion binding, cellular nitrogen compound metabolic process, generation of precursor metabolites and energy, response to stress, small molecule metabolic process, oxidoreductase activity, intracellular	17.0029	50.94	6.29	6.29	23.6229	0.00934579	0.211528	0.0376357	0.851826	1	1	2	Infinity	99.6753	Doubtful
C01R01	Q8VDQ8	NAD-dependent protein deacetylase sirtuin-2 (SIR2_MOUSE)	ENSMUSG00000015149	Sirt2	7	GO:0008283, GO:0006461, GO:0009056, GO:0022607, GO:0048856, GO:0006464, GO:0043167, GO:0007059, GO:0005694, GO:0009058, GO:0005730, GO:0043226, GO:0005575, GO:0003674, GO:0051301, GO:0005623, GO:0008219, GO:0006914, GO:0005829, GO:0034641, GO:0016810, GO:0032182, GO:0008150, GO:0065003, GO:0007165, GO:0000228, GO:0021700, GO:0008134, GO:0006950, GO:0005886, GO:0005622, GO:0000003, GO:0007049, GO:…	cell differentiation, cellular component assembly, transcription factor binding, cellular_component, cell, molecular_function, developmental maturation, cytoplasm, ion binding, cellular nitrogen compound metabolic process, biosynthetic process, nucleolus, enzyme binding, catabolic process, autophagy, chromosome organization, cell proliferation, cell death, cytosol, biological_process, signal tran…	43.2284	86.38	15.17	15.17	67.1442	0.0265638	0.245197	0.106973	0.987414	8	8	30	Infinity	99.6753	Confident
C01R01	P61922	4-aminobutyrate aminotransferase, mitochondrial (GABT_MOUSE)	ENSMUSG00000057880	Abat	16	GO:0009056, GO:0048856, GO:0043167, GO:0006520, GO:0007155, GO:0009058, GO:0043226, GO:0005575, GO:0003013, GO:0003674, GO:0044281, GO:0005623, GO:0034641, GO:0008150, GO:0007165, GO:0007267, GO:0007568, GO:0006810, GO:0005622, GO:0000003, GO:0006950, GO:0005737, GO:0042592, GO:0005739, GO:0019899	cellular amino acid metabolic process, cell-cell signaling, cellular_component, cell, molecular_function, cytoplasm, ion binding, cellular nitrogen compound metabolic process, biosynthetic process, cell adhesion, homeostatic process, enzyme binding, catabolic process, biological_process, signal transduction, organelle, transport, mitochondrion, circulatory system process, response to stress, smal…	56.4156	83.6	38.2	38.2	95.1428	0.0376408	0.610262	0.15158	2.45754	16	16	81	Infinity	99.6753	Confident
C01R01	O88844	Isocitrate dehydrogenase [NADP] cytoplasmic (IDHC_MOUSE)	ENSMUSG00000025950	Idh1	1	GO:0008150, GO:0006091, GO:0006790, GO:0009056, GO:0048856, GO:0043167, GO:0009058, GO:0043226, GO:0005575, GO:0000003, GO:0003674, GO:0005622, GO:0006950, GO:0044281, GO:0005623, GO:0005777, GO:0005975, GO:0016491, GO:0005737, GO:0005739, GO:0006629, GO:0051186, GO:0005829, GO:0034641	carbohydrate metabolic process, catabolic process, cofactor metabolic process, biological_process, cytosol, organelle, peroxisome, cellular_component, cell, molecular_function, mitochondrion, cytoplasm, ion binding, cellular nitrogen compound metabolic process, generation of precursor metabolites and energy, biosynthetic process, response to stress, small molecule metabolic process, lipid metabol…	46.6445	92.51	5.8	5.8	29.6983	0.0117493	0.089023	0.0473149	0.358497	5	5	22	64.9411	90.2728	Confident
C01R01	Q8K3J1	NADH dehydrogenase [ubiquinone] iron-sulfur protein 8, mitochondrial (NDUS8_MOUSE)	ENSMUSG00000059734	Ndufs8	19	GO:0008150, GO:0065003, GO:0006461, GO:0022607, GO:0043167, GO:0043234, GO:0043226, GO:0005575, GO:0003674, GO:0005622, GO:0006950, GO:0007005, GO:0005623, GO:0016491, GO:0005737, GO:0005739	mitochondrion organization, biological_process, cellular component assembly, organelle, macromolecular complex assembly, protein complex, cellular_component, cell, molecular_function, mitochondrion, cytoplasm, ion binding, response to stress, protein complex assembly, oxidoreductase activity, intracellular	24.0228	83.02	14.62	10.85	21.5425	0.00852273	0.193777	0.0343212	0.780342	3	3	11	Infinity	99.6753	Doubtful
C01R01	Q505D7	Optic atrophy 3 protein homolog (OPA3_MOUSE)	ENSMUSG00000052214	Opa3	7	GO:0008150, GO:0048856, GO:0043226, GO:0005575, GO:0005622, GO:0003674, GO:0040007, GO:0007005, GO:0005623, GO:0005737, GO:0006629, GO:0005739, GO:0050877	mitochondrion organization, nervous system process, biological_process, organelle, cellular_component, cell, molecular_function, mitochondrion, cytoplasm, lipid metabolic process, growth, anatomical structure development, intracellular	20.0973	64.25	6.7	6.7	90.2733	0.0357143	0.115884	0.143822	0.466667	2	2	7	Infinity	99.6753	Doubtful
C01R01	O55125	Protein NipSnap homolog 1 (NIPS1_MOUSE)	ENSMUSG00000034285	Nipsnap1	11	GO:0005623, GO:0008150, GO:0005737, GO:0005739, GO:0043226, GO:0005575, GO:0050877, GO:0005886, GO:0005622, GO:0003674	cytoplasm, nervous system process, biological_process, plasma membrane, organelle, cell, cellular_component, intracellular, mitochondrion, molecular_function	33.342	79.93	17.25	14.44	70.9048	0.0280516	0.333521	0.112965	1.3431	5	5	33	Infinity	99.6753	Confident
C01R01	Q9JKC6	Cell cycle exit and neuronal differentiation protein 1 (CEND_MOUSE)	ENSMUSG00000060240	Cend1	7	GO:0008283, GO:0008150, GO:0040011, GO:0048856, GO:0048646, GO:0021700, GO:0043226, GO:0005575, GO:0005622, GO:0003674, GO:0048870, GO:0005623, GO:0005737, GO:0005739, GO:0030154	cell differentiation, cell proliferation, biological_process, organelle, locomotion, anatomical structure formation involved in morphogenesis, cellular_component, cell, molecular_function, mitochondrion, developmental maturation, cell motility, cytoplasm, anatomical structure development, intracellular	14.9778	56.38	38.26	38.26	352.066	0.139286	1.37137	0.560906	5.52255	7	7	33	Infinity	99.6753	Confident
C01R01	P47738	Aldehyde dehydrogenase, mitochondrial (ALDH2_MOUSE)	ENSMUSG00000029455	Aldh2	5	GO:0044281, GO:0005623, GO:0008150, GO:0005737, GO:0016491, GO:0009056, GO:0005739, GO:0043226, GO:0005575, GO:0005622, GO:0003674	cytoplasm, catabolic process, biological_process, small molecule metabolic process, organelle, oxidoreductase activity, cell, cellular_component, intracellular, mitochondrion, molecular_function	56.5018	68.98	19.46	19.46	105.896	0.0418949	0.340518	0.168712	1.37127	13	13	52	Infinity	99.6753	Confident
C01R01	P60761	Neurogranin (NEUG_MOUSE)	ENSMUSG00000053310	Nrgn	9	GO:0008150, GO:0007165, GO:0043167, GO:0007267, GO:0048856, GO:0008289, GO:0005794, GO:0043226, GO:0005575, GO:0003674, GO:0005622, GO:0005623, GO:0005634, GO:0005856, GO:0005737, GO:0005739, GO:0031410, GO:0050877	nervous system process, biological_process, signal transduction, cell-cell signaling, cytoskeleton, organelle, nucleus, cellular_component, cell, lipid binding, molecular_function, mitochondrion, cytoplasm, ion binding, cytoplasmic vesicle, golgi apparatus, anatomical structure development, intracellular	7.49151	60.26	19.23	19.23	215.119	0.0851064	0.258925	0.342725	1.0427	1	1	4	Infinity	99.6753	Doubtful
C01R01	Q9CWS0	N(G),N(G)-dimethylarginine dimethylaminohydrolase 1 (DDAH1_MOUSE)	ENSMUSG00000028194	Ddah1	3	GO:0016810, GO:0008283, GO:0008150, GO:0009056, GO:0048856, GO:0006464, GO:0043167, GO:0006520, GO:0048646, GO:0009058, GO:0043226, GO:0005575, GO:0003013, GO:0005622, GO:0006950, GO:0003674, GO:0044281, GO:0005623, GO:0005737, GO:0005739, GO:0034641	catabolic process, cellular amino acid metabolic process, cell proliferation, biological_process, organelle, anatomical structure formation involved in morphogenesis, hydrolase activity, acting on carbon-nitrogen (but not peptide) bonds, cellular_component, cell, molecular_function, mitochondrion, circulatory system process, cytoplasm, ion binding, cellular nitrogen compound metabolic process, bi…	31.3609	85.61	34.39	34.39	116.911	0.0462529	0.629751	0.186261	2.53602	10	10	31	Infinity	99.6753	Confident
C01R01	Q8K2B3	Succinate dehydrogenase [ubiquinone] flavoprotein subunit, mitochondrial (SDHA_MOUSE)	ENSMUSG00000021577	Sdha	13	GO:0008150, GO:0006091, GO:0043167, GO:0048856, GO:0043234, GO:0043226, GO:0005730, GO:0005575, GO:0003674, GO:0005622, GO:0044281, GO:0005634, GO:0005623, GO:0016491, GO:0005737, GO:0005739, GO:0034641	biological_process, organelle, nucleus, protein complex, cellular_component, cell, molecular_function, mitochondrion, cytoplasm, ion binding, cellular nitrogen compound metabolic process, generation of precursor metabolites and energy, small molecule metabolic process, nucleolus, oxidoreductase activity, anatomical structure development, intracellular	72.5392	77.11	17.17	17.17	69.9464	0.0276724	0.350314	0.111437	1.41072	10	10	50	Infinity	99.6753	Confident
C01R01	Q11011	Puromycin-sensitive aminopeptidase (PSA_MOUSE)	ENSMUSG00000001441	Npepps	11	GO:0008150, GO:0009056, GO:0043167, GO:0008233, GO:0043226, GO:0006810, GO:0005575, GO:0007005, GO:0006950, GO:0005622, GO:0003674, GO:0006605, GO:0005634, GO:0005623, GO:0005737, GO:0005829, GO:0034641	mitochondrion organization, catabolic process, biological_process, cytosol, organelle, nucleus, peptidase activity, transport, cellular_component, cell, molecular_function, cytoplasm, ion binding, cellular nitrogen compound metabolic process, response to stress, protein targeting, intracellular	103.26	68.26	11.63	10.65	35.0596	0.0138704	0.243761	0.0558565	0.981629	16	16	50	Infinity	99.6753	Confident
C01R01	P35700	Peroxiredoxin-1 (PRDX1_MOUSE)	ENSMUSG00000028691	Prdx1	4	GO:0008283, GO:0008150, GO:0009056, GO:0007165, GO:0006464, GO:0005576, GO:0043226, GO:0005575, GO:0006810, GO:0005622, GO:0006950, GO:0002376, GO:0003674, GO:0006605, GO:0006913, GO:0005623, GO:0005634, GO:0016491, GO:0005737, GO:0042592, GO:0005739, GO:0051186, GO:0005829	catabolic process, cofactor metabolic process, cell proliferation, biological_process, signal transduction, cytosol, organelle, extracellular region, nucleus, transport, cellular_component, cell, molecular_function, mitochondrion, cytoplasm, response to stress, protein targeting, nucleocytoplasmic transport, cellular protein modification process, immune system process, oxidoreductase activity, ho…	22.1624	87.44	46.23	42.21	220.517	0.0872418	1.72134	0.351324	6.93187	10	10	65	Infinity	99.6753	Confident
C01R01	P17665	Cytochrome c oxidase subunit 7C, mitochondrial (COX7C_MOUSE)	ENSMUSG00000017778	Cox7c	13	GO:0008150, GO:0006091, GO:0055085, GO:0022857, GO:0043234, GO:0043226, GO:0006810, GO:0005575, GO:0003674, GO:0005622, GO:0044281, GO:0005623, GO:0005737, GO:0016491, GO:0005739, GO:0034641	biological_process, transmembrane transporter activity, organelle, transport, protein complex, cellular_component, cell, molecular_function, mitochondrion, cytoplasm, transmembrane transport, cellular nitrogen compound metabolic process, generation of precursor metabolites and energy, small molecule metabolic process, oxidoreductase activity, intracellular	7.32788	100	28.57	28.57	320.972	0.126984	0.584893	0.511368	2.35538	2	2	10	Infinity	99.6753	Confident
C01R01	P16330	2',3'-cyclic-nucleotide 3'-phosphodiesterase (CN37_MOUSE)	ENSMUSG00000006782	Cnp	11	GO:0007010, GO:0009056, GO:0048856, GO:0043226, GO:0005576, GO:0005575, GO:0003674, GO:0005654, GO:0044281, GO:0005623, GO:0003723, GO:0005829, GO:0031410, GO:0034641, GO:0008150, GO:0061024, GO:0000902, GO:0007568, GO:0006810, GO:0005886, GO:0005622, GO:0007005, GO:0005634, GO:0005615, GO:0005856, GO:0005737, GO:0005739, GO:0030154, GO:0034655	nucleoplasm, cell differentiation, extracellular region, cellular_component, cell, rna binding, molecular_function, cytoplasm, cellular nitrogen compound metabolic process, membrane organization, cell morphogenesis, extracellular space, mitochondrion organization, catabolic process, nucleobase-containing compound catabolic process, cytoskeleton organization, cytosol, biological_process, plasma me…	47.0935	85.24	42.86	42.86	159.732	0.0631936	0.867181	0.254482	3.49216	19	19	113	Infinity	99.6753	Confident
C01R01	Q8BH95	Enoyl-CoA hydratase, mitochondrial (ECHM_MOUSE)	ENSMUSG00000025465	Echs1	7	GO:0044281, GO:0005623, GO:0008150, GO:0009056, GO:0005737, GO:0006629, GO:0005739, GO:0016829, GO:0043226, GO:0005575, GO:0005622, GO:0003674	cytoplasm, catabolic process, biological_process, small molecule metabolic process, organelle, lipid metabolic process, lyase activity, cell, cellular_component, intracellular, mitochondrion, molecular_function	31.4542	77.24	15.86	15.86	91.2211	0.0360892	0.211528	0.145332	0.851826	4	4	18	Infinity	99.6753	Confident
C01R01	P35486	Pyruvate dehydrogenase E1 component subunit alpha, somatic form, mitochondrial (ODPA_MOUSE)	ENSMUSG00000031299	Pdha1	X	GO:0008150, GO:0006091, GO:0006790, GO:0009058, GO:0005730, GO:0043226, GO:0005575, GO:0003674, GO:0005622, GO:0044281, GO:0005634, GO:0005623, GO:0005975, GO:0016491, GO:0005737, GO:0051186, GO:0005739, GO:0034641	carbohydrate metabolic process, cofactor metabolic process, biological_process, organelle, nucleus, cellular_component, cell, molecular_function, mitochondrion, cytoplasm, cellular nitrogen compound metabolic process, generation of precursor metabolites and energy, biosynthetic process, small molecule metabolic process, sulfur compound metabolic process, nucleolus, oxidoreductase activity, intrac…	43.2036	75.9	24.36	24.36	104.162	0.0412088	0.501311	0.165949	2.01879	14	14	54	Infinity	99.6753	Confident
C01R01	Q61171	Peroxiredoxin-2 (PRDX2_MOUSE)	ENSMUSG00000005161	Prdx2	8	GO:0008283, GO:0008150, GO:0007165, GO:0009056, GO:0048856, GO:0006464, GO:0007155, GO:0009058, GO:0043226, GO:0005575, GO:0005622, GO:0003674, GO:0002376, GO:0006950, GO:0005623, GO:0008219, GO:0016491, GO:0005737, GO:0042592, GO:0005739, GO:0051186, GO:0030154, GO:0005829, GO:0034641	catabolic process, cell differentiation, cofactor metabolic process, cell proliferation, cell death, biological_process, signal transduction, cytosol, organelle, cellular_component, cell, molecular_function, mitochondrion, cytoplasm, cellular nitrogen compound metabolic process, biosynthetic process, response to stress, cell adhesion, cellular protein modification process, immune system process, …	21.7651	67.68	35.86	31.82	210.821	0.0834059	1.33572	0.335877	5.37898	9	9	46	Infinity	99.6753	Confident
C01R01	Q62465	Synaptic vesicle membrane protein VAT-1 homolog (VAT1_MOUSE)	ENSMUSG00000034993	Vat1	11	GO:0061024, GO:0008150, GO:0043167, GO:0048856, GO:0043226, GO:0005575, GO:0003674, GO:0005622, GO:0007005, GO:0005623, GO:0005737, GO:0016491, GO:0005739	mitochondrion organization, biological_process, organelle, cellular_component, cell, molecular_function, mitochondrion, cytoplasm, ion binding, membrane organization, oxidoreductase activity, anatomical structure development, intracellular	43.069	62.07	4.43	4.43	50.0075	0.0197842	0.149757	0.0796713	0.603074	3	3	11	40.1247	89.9061	Confident
C01R01	Q9D6R2	Isocitrate dehydrogenase [NAD] subunit alpha, mitochondrial (IDH3A_MOUSE)	ENSMUSG00000032279	Idh3a	9	GO:0044281, GO:0008150, GO:0005623, GO:0006091, GO:0005737, GO:0016491, GO:0005739, GO:0043167, GO:0043226, GO:0005575, GO:0005622, GO:0003674	cytoplasm, ion binding, generation of precursor metabolites and energy, biological_process, small molecule metabolic process, organelle, oxidoreductase activity, cell, cellular_component, intracellular, mitochondrion, molecular_function	39.6131	72.68	45.08	45.08	208.467	0.0824744	1.42446	0.332126	5.73634	16	16	121	Infinity	99.6753	Confident
C01R01	O08553	Dihydropyrimidinase-related protein 2 (DPYL2_MOUSE)	ENSMUSG00000022048	Dpysl2	14	GO:0016810, GO:0008150, GO:0007010, GO:0040011, GO:0000902, GO:0048856, GO:0043226, GO:0006810, GO:0005575, GO:0005886, GO:0040007, GO:0005622, GO:0003674, GO:0005623, GO:0005856, GO:0016192, GO:0005737, GO:0005739, GO:0030154, GO:0005829, GO:0008092, GO:0019899	enzyme binding, cell differentiation, cytoskeleton organization, biological_process, plasma membrane, cytoskeleton, cytosol, organelle, locomotion, hydrolase activity, acting on carbon-nitrogen (but not peptide) bonds, transport, cellular_component, cell, molecular_function, mitochondrion, cytoplasm, cell morphogenesis, growth, cytoskeletal protein binding, anatomical structure development, intra…	62.2386	82.34	62.41	62.41	153.569	0.0607555	1.39503	0.244664	5.6178	26	20	222	Infinity	99.6753	Confident
C01R01	O88696	ATP-dependent Clp protease proteolytic subunit, mitochondrial (CLPP_MOUSE)	ENSMUSG00000002660	Clpp	17	GO:0008150, GO:0065003, GO:0006461, GO:0009056, GO:0022607, GO:0043234, GO:0008233, GO:0043226, GO:0005575, GO:0003674, GO:0005622, GO:0005623, GO:0005737, GO:0005739	catabolic process, biological_process, cellular component assembly, organelle, peptidase activity, macromolecular complex assembly, protein complex, cellular_component, cell, molecular_function, mitochondrion, cytoplasm, protein complex assembly, intracellular	29.7813	69.12	9.93	9.93	40.7686	0.016129	0.193777	0.0649519	0.780342	2	2	5	Infinity	99.6753	Confident
C01R01	P12787	Cytochrome c oxidase subunit 5A, mitochondrial (COX5A_MOUSE)	ENSMUSG00000000088	Cox5a	9	GO:0008150, GO:0006091, GO:0055085, GO:0022857, GO:0043167, GO:0043234, GO:0043226, GO:0005575, GO:0006810, GO:0003674, GO:0005622, GO:0044281, GO:0005623, GO:0005737, GO:0016491, GO:0005739, GO:0034641	biological_process, transmembrane transporter activity, organelle, transport, protein complex, cellular_component, cell, molecular_function, mitochondrion, cytoplasm, transmembrane transport, ion binding, cellular nitrogen compound metabolic process, generation of precursor metabolites and energy, small molecule metabolic process, oxidoreductase activity, intracellular	16.0913	80.14	46.58	46.58	184.38	0.0729452	1.25393	0.293752	5.04962	8	8	45	Infinity	99.6753	Confident
C01R01	Q63844	Mitogen-activated protein kinase 3 (MK03_MOUSE)	ENSMUSG00000063065	Mapk3	7	GO:0009790, GO:0007010, GO:0022607, GO:0005794, GO:0043226, GO:0044281, GO:0005623, GO:0008219, GO:0006914, GO:0005829, GO:0050877, GO:0008150, GO:0065003, GO:0048646, GO:0006259, GO:0006810, GO:0004871, GO:0002376, GO:0005886, GO:0006412, GO:0005635, GO:0005634, GO:0042592, GO:0009056, GO:0040011, GO:0048856, GO:0006464, GO:0043167, GO:0009058, GO:0005575, GO:0003674, GO:0005654, GO:0016192, GO:…	cellular component assembly, anatomical structure formation involved in morphogenesis, molecular_function, immune system process, homeostatic process, enzyme binding, nervous system process, catabolic process, autophagy, signal transduction, cytoskeleton, organelle, nuclear envelope, macromolecular complex assembly, mitochondrion, cell motility, signal transducer activity, response to stress, kin…	43.0391	82.37	8.42	8.42	29.6499	0.0117302	0.115884	0.0472378	0.466667	3	2	7	Infinity	99.6753	Confident
C01R01	P48771	Cytochrome c oxidase subunit 7A2, mitochondrial (CX7A2_MOUSE)	ENSMUSG00000032330	Cox7a2	9	GO:0008150, GO:0006091, GO:0055085, GO:0022857, GO:0043226, GO:0006810, GO:0005575, GO:0003674, GO:0005622, GO:0005623, GO:0005737, GO:0016491, GO:0005739	biological_process, transmembrane transporter activity, organelle, transport, cellular_component, cell, molecular_function, mitochondrion, cytoplasm, transmembrane transport, generation of precursor metabolites and energy, oxidoreductase activity, intracellular	9.28496	100	37.35	37.35	548.166	0.216867	1.03092	0.87333	4.15153	5	5	33	Infinity	99.6753	Confident
C01R01	Q8K1M6	Dynamin-1-like protein (DNM1L_MOUSE)	ENSMUSG00000022789	Dnm1l	16	GO:0009056, GO:0006461, GO:0022607, GO:0048856, GO:0043167, GO:0008289, GO:0005794, GO:0043226, GO:0003013, GO:0005575, GO:0003674, GO:0044281, GO:0005623, GO:0016192, GO:0008219, GO:0003924, GO:0006914, GO:0031410, GO:0005829, GO:0034641, GO:0008150, GO:0061024, GO:0065003, GO:0007165, GO:0006810, GO:0007005, GO:0005622, GO:0005777, GO:0005856, GO:0005737, GO:0005739, GO:0008092, GO:0019899	cellular component assembly, gtpase activity, cellular_component, cell, molecular_function, cytoplasm, ion binding, cellular nitrogen compound metabolic process, membrane organization, cytoskeletal protein binding, enzyme binding, mitochondrion organization, catabolic process, autophagy, cell death, cytosol, biological_process, signal transduction, cytoskeleton, organelle, peroxisome, macromolecu…	82.6065	92.72	15.23	15.23	26.1493	0.0103453	0.221677	0.0416606	0.892699	13	13	38	Infinity	99.6753	Confident
C01R01	P11499	Heat shock protein HSP 90-beta (HS90B_MOUSE)	ENSMUSG00000023944	Hsp90ab1	17	GO:0006461, GO:0009056, GO:0022607, GO:0048856, GO:0006464, GO:0043167, GO:0009058, GO:0043226, GO:0005576, GO:0005575, GO:0005773, GO:0003674, GO:0006913, GO:0005623, GO:0003723, GO:0008219, GO:0031410, GO:0005829, GO:0034641, GO:0008150, GO:0065003, GO:0007165, GO:0000902, GO:0022618, GO:0051082, GO:0043234, GO:0006259, GO:0044403, GO:0006457, GO:0006810, GO:0002376, GO:0000003, GO:0005622, GO:…	cell differentiation, cellular component assembly, extracellular region, cellular_component, cell, rna binding, protein complex, molecular_function, cytoplasm, ion binding, cellular nitrogen compound metabolic process, biosynthetic process, enzyme regulator activity, cell morphogenesis, protein targeting, protein folding, immune system process, homeostatic process, cytoskeletal protein binding, u…	83.2291	82.46	11.46	11.46	57.5541	0.0227698	0.13921	0.0916943	0.560601	9	6	35	Infinity	99.6753	Confident
C01R01	P15105	Glutamine synthetase (GLNA_MOUSE)	ENSMUSG00000026473	Glul	1	GO:0008283, GO:0008150, GO:0065003, GO:0006461, GO:0022607, GO:0007267, GO:0016829, GO:0043167, GO:0006520, GO:0005783, GO:0009058, GO:0043226, GO:0005575, GO:0006810, GO:0003674, GO:0005622, GO:0006950, GO:0044281, GO:0005623, GO:0005737, GO:0005739, GO:0005829, GO:0016874	cellular amino acid metabolic process, cell proliferation, biological_process, cell-cell signaling, cytosol, cellular component assembly, organelle, macromolecular complex assembly, transport, cellular_component, cell, molecular_function, mitochondrion, cytoplasm, ion binding, biosynthetic process, response to stress, small molecule metabolic process, lyase activity, ligase activity, protein comp…	42.0923	68.9	24.4	22.25	88.4741	0.0350025	0.637894	0.140956	2.56881	11	11	51	Infinity	99.6753	Confident
C01R01	P29758	Ornithine aminotransferase, mitochondrial (OAT_MOUSE)	ENSMUSG00000030934	Oat	7	GO:0008150, GO:0065003, GO:0006461, GO:0022607, GO:0043167, GO:0006520, GO:0009058, GO:0043226, GO:0005575, GO:0005622, GO:0003674, GO:0005654, GO:0044281, GO:0005623, GO:0005634, GO:0005737, GO:0005739	nucleoplasm, cellular amino acid metabolic process, biological_process, cellular component assembly, organelle, nucleus, macromolecular complex assembly, cellular_component, cell, molecular_function, mitochondrion, cytoplasm, ion binding, biosynthetic process, small molecule metabolic process, protein complex assembly, intracellular	48.3239	75.17	12.53	12.53	56.8084	0.0224747	0.216484	0.0905063	0.871785	4	4	16	Infinity	99.6753	Confident
C01R01	P28474	Alcohol dehydrogenase class-3 (ADHX_MOUSE)	ENSMUSG00000028138	Adh5	3	GO:0008150, GO:0009056, GO:0043167, GO:0006464, GO:0008289, GO:0043226, GO:0005575, GO:0003013, GO:0006950, GO:0005622, GO:0003674, GO:0044281, GO:0005623, GO:0005737, GO:0016491, GO:0006629, GO:0005739	catabolic process, biological_process, organelle, cellular_component, cell, lipid binding, molecular_function, mitochondrion, circulatory system process, cytoplasm, ion binding, response to stress, small molecule metabolic process, lipid metabolic process, cellular protein modification process, oxidoreductase activity, intracellular	39.5221	66.58	5.88	5.88	30.6382	0.0121212	0.0624678	0.0488124	0.251559	1	1	4	Infinity	99.6753	Doubtful
C01R01	P17710	Hexokinase-1 (HXK1_MOUSE)	ENSMUSG00000037012	Hk1	10	GO:0008150, GO:0006091, GO:0009056, GO:0043167, GO:0043226, GO:0006810, GO:0005575, GO:0003674, GO:0002376, GO:0005622, GO:0044281, GO:0005623, GO:0005975, GO:0005737, GO:0042592, GO:0005739, GO:0051186, GO:0005929, GO:0005829, GO:0034641, GO:0016301	carbohydrate metabolic process, catabolic process, cofactor metabolic process, biological_process, cytosol, organelle, transport, cellular_component, cell, molecular_function, mitochondrion, cytoplasm, cilium, ion binding, cellular nitrogen compound metabolic process, generation of precursor metabolites and energy, kinase activity, small molecule metabolic process, immune system process, homeosta…	108.234	79.67	25.77	23.82	61.6082	0.0243737	0.532794	0.0981533	2.14557	30	26	161	Infinity	99.6753	Confident
C01R01	P58281	Dynamin-like 120 kDa protein, mitochondrial (OPA1_MOUSE)	ENSMUSG00000038084	Opa1	16	GO:0009790, GO:0006461, GO:0022607, GO:0048856, GO:0043167, GO:0008289, GO:0043226, GO:0005575, GO:0003674, GO:0005654, GO:0044281, GO:0005623, GO:0008219, GO:0003924, GO:0005829, GO:0034641, GO:0050877, GO:0061024, GO:0008150, GO:0065003, GO:0007165, GO:0048646, GO:0007568, GO:0005622, GO:0006950, GO:0007005, GO:0005634, GO:0005737, GO:0005739, GO:0008092	nucleoplasm, cellular component assembly, gtpase activity, anatomical structure formation involved in morphogenesis, embryo development, cellular_component, cell, molecular_function, cytoplasm, ion binding, cellular nitrogen compound metabolic process, membrane organization, cytoskeletal protein binding, mitochondrion organization, nervous system process, cell death, cytosol, biological_process, …	111.27	94.06	2.6	2.6	19.7473	0.0078125	0.0327281	0.0314611	0.131797	7	7	17	Infinity	99.6753	Confident
C01R01	Q6GQS1	Calcium-binding mitochondrial carrier protein SCaMC-3 (SCMC3_MOUSE)	ENSMUSG00000046329	Slc25a23	17	GO:0008150, GO:0006091, GO:0055085, GO:0022857, GO:0043167, GO:0043226, GO:0006810, GO:0005575, GO:0005622, GO:0003674, GO:0044281, GO:0005623, GO:0005737, GO:0042592, GO:0005739, GO:0034641	biological_process, transmembrane transporter activity, organelle, transport, cellular_component, cell, molecular_function, mitochondrion, cytoplasm, transmembrane transport, ion binding, cellular nitrogen compound metabolic process, generation of precursor metabolites and energy, small molecule metabolic process, homeostatic process, intracellular	52.464	91.65	2.36	2.36	5.90573	0.00233645	0.0435626	0.00940893	0.175428	2	2	2	Infinity	99.6753	Doubtful
C01R01	O08599	Syntaxin-binding protein 1 (STXB1_MOUSE)	ENSMUSG00000026797	Stxbp1	2	GO:0006461, GO:0022607, GO:0048856, GO:0007155, GO:0043226, GO:0005575, GO:0003674, GO:0005654, GO:0005623, GO:0007009, GO:0016192, GO:0008219, GO:0031410, GO:0005829, GO:0061024, GO:0008150, GO:0065003, GO:0000902, GO:0007267, GO:0021700, GO:0006810, GO:0002376, GO:0006950, GO:0005622, GO:0005886, GO:0000003, GO:0005634, GO:0005856, GO:0005737, GO:0005739, GO:0030154, GO:0019899	nucleoplasm, cell differentiation, cell-cell signaling, cellular component assembly, cellular_component, cell, molecular_function, developmental maturation, cytoplasm, plasma membrane organization, cell adhesion, membrane organization, cell morphogenesis, immune system process, enzyme binding, cell death, cytosol, biological_process, plasma membrane, cytoskeleton, organelle, nucleus, macromolecul…	67.5259	84.01	49.66	49.66	119.045	0.0470971	1.28047	0.189661	5.15649	34	34	188	Infinity	99.6753	Confident
C01R01	Q9JHI5	Isovaleryl-CoA dehydrogenase, mitochondrial (IVD_MOUSE)	ENSMUSG00000027332	Ivd	2	GO:0008150, GO:0009056, GO:0043167, GO:0006520, GO:0043226, GO:0005575, GO:0005622, GO:0003674, GO:0005654, GO:0044281, GO:0005634, GO:0005623, GO:0016491, GO:0005737, GO:0006629, GO:0005739	catabolic process, nucleoplasm, cellular amino acid metabolic process, biological_process, organelle, nucleus, cellular_component, cell, molecular_function, mitochondrion, cytoplasm, ion binding, small molecule metabolic process, lipid metabolic process, oxidoreductase activity, intracellular	46.2959	71.23	5.42	5.42	32.3138	0.0127841	0.102943	0.0514818	0.414555	5	5	11	Infinity	99.6753	Confident
C01R01	D3Z7P3	Glutaminase kidney isoform, mitochondrial (GLSK_MOUSE)	ENSMUSG00000026103	Gls	1	GO:0016810, GO:0008150, GO:0065003, GO:0006461, GO:0009056, GO:0022607, GO:0007267, GO:0006520, GO:0009058, GO:0043226, GO:0005575, GO:0005622, GO:0003674, GO:0044281, GO:0005623, GO:0005737, GO:0005739, GO:0005829, GO:0050877	catabolic process, nervous system process, cellular amino acid metabolic process, biological_process, cell-cell signaling, cytosol, cellular component assembly, organelle, hydrolase activity, acting on carbon-nitrogen (but not peptide) bonds, macromolecular complex assembly, cellular_component, cell, molecular_function, mitochondrion, cytoplasm, biosynthetic process, small molecule metabolic proc…	73.9162	77.45	5.79	5.79	40.9853	0.0162148	0.102183	0.0652972	0.411491	6	6	22	Infinity	99.6753	Confident
C01R01	P97807	Fumarate hydratase, mitochondrial (FUMH_MOUSE)		Fh		GO:0008150, GO:0006091, GO:0016829, GO:0043234, GO:0043226, GO:0005575, GO:0005622, GO:0003674, GO:0044281, GO:0005623, GO:0005737, GO:0042592, GO:0005739	biological_process, organelle, protein complex, cellular_component, cell, molecular_function, mitochondrion, cytoplasm, generation of precursor metabolites and energy, small molecule metabolic process, lyase activity, homeostatic process, intracellular	54.3221	75.15	45.17	45.17	114.891	0.0454538	0.995262	0.183043	4.00794	15	15	100	Infinity	99.6753	Confident
C01R01	Q9D6K5	Synaptojanin-2-binding protein (SYJ2B_MOUSE)	ENSMUSG00000090935	Synj2bp	12	GO:0008283, GO:0008150, GO:0040011, GO:0007165, GO:0048856, GO:0006464, GO:0048646, GO:0043226, GO:0005575, GO:0006810, GO:0007005, GO:0005622, GO:0003674, GO:0048870, GO:0005623, GO:0006605, GO:0016192, GO:0005737, GO:0005739	mitochondrion organization, cell proliferation, biological_process, signal transduction, organelle, locomotion, anatomical structure formation involved in morphogenesis, transport, cellular_component, cell, molecular_function, mitochondrion, cell motility, cytoplasm, protein targeting, cellular protein modification process, anatomical structure development, intracellular, vesicle-mediated transpo…	15.8052	60	8.28	8.28	34.8642	0.0137931	0.165914	0.0555451	0.668141	1	1	4	Infinity	99.6753	Doubtful
C01R01	Q9D6J6	NADH dehydrogenase [ubiquinone] flavoprotein 2, mitochondrial (NDUV2_MOUSE)	ENSMUSG00000024099	Ndufv2	17	GO:0008150, GO:0006091, GO:0048856, GO:0043167, GO:0043234, GO:0043226, GO:0005575, GO:0005622, GO:0003674, GO:0044281, GO:0005623, GO:0005737, GO:0016491, GO:0005739, GO:0034641	biological_process, organelle, protein complex, cellular_component, cell, molecular_function, mitochondrion, cytoplasm, ion binding, cellular nitrogen compound metabolic process, generation of precursor metabolites and energy, small molecule metabolic process, oxidoreductase activity, anatomical structure development, intracellular	27.2679	87.1	33.06	33.06	182.469	0.0721892	0.858792	0.290707	3.45837	7	7	40	Infinity	99.6753	Confident
C01R01	Q9D6J5	NADH dehydrogenase [ubiquinone] 1 beta subcomplex subunit 8, mitochondrial (NDUB8_MOUSE)	ENSMUSG00000025204	Ndufb8	19	GO:0008150, GO:0006091, GO:0065003, GO:0006461, GO:0022607, GO:0005783, GO:0043234, GO:0043226, GO:0005575, GO:0005622, GO:0003674, GO:0007005, GO:0044281, GO:0005623, GO:0005737, GO:0016491, GO:0005739, GO:0034641	mitochondrion organization, biological_process, cellular component assembly, organelle, macromolecular complex assembly, protein complex, cellular_component, cell, molecular_function, mitochondrion, cytoplasm, cellular nitrogen compound metabolic process, generation of precursor metabolites and energy, small molecule metabolic process, protein complex assembly, oxidoreductase activity, intracellu…	21.8615	84.95	4.84	4.84	27.1791	0.0107527	0.110336	0.0433013	0.444327	2	2	6	29.0528	88.0734	Doubtful
C01R01	Q62442	Vesicle-associated membrane protein 1 (VAMP1_MOUSE)	ENSMUSG00000030337	Vamp1	6	GO:0061024, GO:0008150, GO:0065003, GO:0006461, GO:0022607, GO:0043234, GO:0043226, GO:0005575, GO:0006810, GO:0005622, GO:0003674, GO:0005623, GO:0016192, GO:0005737, GO:0005739, GO:0031410	biological_process, cellular component assembly, organelle, macromolecular complex assembly, transport, protein complex, cellular_component, cell, molecular_function, mitochondrion, cytoplasm, cytoplasmic vesicle, membrane organization, protein complex assembly, intracellular, vesicle-mediated transport	12.8815	73.73	20.34	20.34	29.0535	0.0114943	0.178769	0.0462876	0.719905	1	1	1	Infinity	99.6753	Doubtful
C01R01	Q8BH59	Calcium-binding mitochondrial carrier protein Aralar1 (CMC1_MOUSE)	ENSMUSG00000027010	Slc25a12	2	GO:0008150, GO:0006091, GO:0055085, GO:0022857, GO:0043167, GO:0043226, GO:0006810, GO:0005575, GO:0005622, GO:0003674, GO:0005623, GO:0005737, GO:0005739	biological_process, transmembrane transporter activity, organelle, transport, cellular_component, cell, molecular_function, mitochondrion, cytoplasm, transmembrane transport, ion binding, generation of precursor metabolites and energy, intracellular	74.5227	76.51	38.55	36.78	77.2844	0.0305755	0.902882	0.123128	3.63592	23	19	129	Infinity	99.6753	Confident
C01R01	Q62425	Cytochrome c oxidase subunit NDUFA4 (NDUA4_MOUSE)	ENSMUSG00000029632	Ndufa4	6	GO:0008150, GO:0006091, GO:0055085, GO:0022857, GO:0043234, GO:0043226, GO:0006810, GO:0005575, GO:0003674, GO:0005622, GO:0005623, GO:0005737, GO:0016491, GO:0005739	biological_process, transmembrane transporter activity, organelle, transport, protein complex, cellular_component, cell, molecular_function, mitochondrion, cytoplasm, transmembrane transport, generation of precursor metabolites and energy, oxidoreductase activity, intracellular	9.32087	100	47.56	47.56	297.975	0.117886	1.15443	0.47473	4.64893	5	5	29	Infinity	99.6753	Confident
C01R01	Q68FD5	Clathrin heavy chain 1 (CLH1_MOUSE)	ENSMUSG00000047126	Cltc	11	GO:0007010, GO:0006461, GO:0009056, GO:0022607, GO:0005198, GO:0005794, GO:0005694, GO:0009058, GO:0005576, GO:0043226, GO:0005575, GO:0005773, GO:0003674, GO:0000278, GO:0051301, GO:0044281, GO:0005623, GO:0007009, GO:0005768, GO:0003723, GO:0016192, GO:0006914, GO:0140014, GO:0031410, GO:0005829, GO:0008150, GO:0061024, GO:0065003, GO:0043234, GO:0006810, GO:0005886, GO:0007049, GO:0005622, GO:…	carbohydrate metabolic process, cellular component assembly, extracellular region, mitotic cell cycle, cellular_component, cell, rna binding, protein complex, molecular_function, cytoplasm, plasma membrane organization, endosome, biosynthetic process, membrane organization, mitotic nuclear division, enzyme binding, catabolic process, autophagy, cytoskeleton organization, vacuole, cytosol, biologi…	191.435	75.94	12.3	12.3	17.5945	0.0069608	0.207456	0.0280313	0.83543	24	24	77	Infinity	99.6753	Confident
C01R01	Q9D6M3	Mitochondrial glutamate carrier 1 (GHC1_MOUSE)	ENSMUSG00000019082	Slc25a22	7	GO:0005623, GO:0008150, GO:0055085, GO:0022857, GO:0005737, GO:0005739, GO:0043226, GO:0005575, GO:0006810, GO:0005622, GO:0003674	cytoplasm, transmembrane transport, biological_process, transmembrane transporter activity, organelle, transport, cell, cellular_component, intracellular, mitochondrion, molecular_function	34.6482	62.85	13.62	11.15	67.2074	0.0265888	0.333521	0.107074	1.3431	5	3	20	Infinity	99.6753	Confident
C01R01	P39053	Dynamin-1 (DYN1_MOUSE)	ENSMUSG00000026825	Dnm1	2	GO:0006461, GO:0022607, GO:0043167, GO:0005794, GO:0043226, GO:0005575, GO:0003674, GO:0005654, GO:0005623, GO:0016192, GO:0003924, GO:0031410, GO:0050877, GO:0061024, GO:0008150, GO:0065003, GO:0007165, GO:0007267, GO:0043234, GO:0006810, GO:0007005, GO:0005622, GO:0005886, GO:0005634, GO:0005856, GO:0005737, GO:0005739, GO:0008092, GO:0019899	nucleoplasm, cell-cell signaling, cellular component assembly, gtpase activity, cellular_component, cell, protein complex, molecular_function, cytoplasm, ion binding, membrane organization, cytoskeletal protein binding, enzyme binding, mitochondrion organization, nervous system process, biological_process, signal transduction, plasma membrane, cytoskeleton, organelle, nucleus, macromolecular comp…	97.7413	80.74	23.07	23.07	43.8278	0.0173393	0.409687	0.0698257	1.64982	22	15	88	Infinity	99.6753	Confident
C01R01	Q791V5	Mitochondrial carrier homolog 2 (MTCH2_MOUSE)	ENSMUSG00000111714	Mtch2	CHR_MG191_PATCH	GO:0008150, GO:0061024, GO:0006091, GO:0040011, GO:0009056, GO:0007165, GO:0043226, GO:0005575, GO:0006810, GO:0003674, GO:0007005, GO:0005622, GO:0006950, GO:0048870, GO:0044281, GO:0005975, GO:0005623, GO:0008219, GO:0005737, GO:0042592, GO:0051186, GO:0005739, GO:0034641	carbohydrate metabolic process, mitochondrion organization, catabolic process, cofactor metabolic process, cell death, biological_process, signal transduction, organelle, locomotion, transport, cellular_component, cell, molecular_function, mitochondrion, cell motility, cytoplasm, cellular nitrogen compound metabolic process, generation of precursor metabolites and energy, response to stress, memb…	33.477	62.71	5.28	5.28	35.4344	0.0140187	0.0964782	0.0564536	0.38852	3	3	5	Infinity	99.6753	Doubtful
C01R01	P37040	NADPH--cytochrome P450 reductase (NCPR_MOUSE)	ENSMUSG00000005514	Por	5	GO:0008283, GO:0009056, GO:0043167, GO:0048856, GO:0006464, GO:0009058, GO:0043226, GO:0005575, GO:0003674, GO:0044281, GO:0005623, GO:0008219, GO:0016491, GO:0034641, GO:0008150, GO:0006091, GO:0007165, GO:0005783, GO:0005622, GO:0040007, GO:0005737, GO:0006629, GO:0005739, GO:0030154, GO:0019899	cell differentiation, cellular_component, cell, molecular_function, cytoplasm, ion binding, cellular nitrogen compound metabolic process, biosynthetic process, enzyme binding, catabolic process, cell proliferation, cell death, biological_process, signal transduction, organelle, mitochondrion, generation of precursor metabolites and energy, small molecule metabolic process, lipid metabolic process…	76.9953	69.91	1.33	1.33	9.1416	0.00361664	0.032045	0.0145643	0.129046	2	2	5	24.3804	87.6975	Doubtful
C01R01	P63328	Serine/threonine-protein phosphatase 2B catalytic subunit alpha isoform (PP2BA_MOUSE)	ENSMUSG00000028161	Ppp3ca	3	GO:0006464, GO:0043167, GO:0048856, GO:0009058, GO:0043226, GO:0005575, GO:0003674, GO:0000278, GO:0005654, GO:0006913, GO:0005623, GO:0016192, GO:0016791, GO:0005829, GO:0034641, GO:0008150, GO:0007165, GO:0000902, GO:0007267, GO:0006810, GO:0006950, GO:0005622, GO:0005886, GO:0007049, GO:0006412, GO:0005634, GO:0006605, GO:0005737, GO:0042592, GO:0005739, GO:0030154, GO:0019899	nucleoplasm, cell differentiation, cell-cell signaling, mitotic cell cycle, cellular_component, cell, molecular_function, cytoplasm, ion binding, cellular nitrogen compound metabolic process, biosynthetic process, cell morphogenesis, protein targeting, homeostatic process, enzyme binding, cytosol, biological_process, signal transduction, plasma membrane, cell cycle, organelle, nucleus, transport,…	58.6063	71.21	24.95	24.95	86.4724	0.0342105	0.55949	0.137767	2.25308	13	9	70	Infinity	99.6753	Confident
C01R01	Q91WS0	CDGSH iron-sulfur domain-containing protein 1 (CISD1_MOUSE)	ENSMUSG00000037710	Cisd1	10	GO:0008150, GO:0005623, GO:0006091, GO:0005737, GO:0005739, GO:0043167, GO:0043226, GO:0005575, GO:0003674, GO:0005622	cytoplasm, ion binding, generation of precursor metabolites and energy, biological_process, organelle, cell, cellular_component, intracellular, mitochondrion, molecular_function	12.0892	100	43.52	43.52	312.056	0.123457	0.668101	0.497163	2.69045	5	5	23	Infinity	99.6753	Confident
C01R01	Q8QZT1	Acetyl-CoA acetyltransferase, mitochondrial (THIL_MOUSE)	ENSMUSG00000032047	Acat1	9	GO:0016746, GO:0006461, GO:0009056, GO:0022607, GO:0016829, GO:0043167, GO:0048856, GO:0006520, GO:0009058, GO:0043226, GO:0005575, GO:0003674, GO:0044281, GO:0005623, GO:0051186, GO:0034641, GO:0016874, GO:0008150, GO:0065003, GO:0006790, GO:0005622, GO:0006950, GO:0005737, GO:0006629, GO:0005739, GO:0019899	cellular amino acid metabolic process, cellular component assembly, transferase activity, transferring acyl groups, cellular_component, cell, molecular_function, cytoplasm, ion binding, cellular nitrogen compound metabolic process, biosynthetic process, sulfur compound metabolic process, enzyme binding, catabolic process, cofactor metabolic process, biological_process, organelle, macromolecular c…	44.7873	77.12	39.39	39.39	89.2675	0.0353163	0.753487	0.14222	3.03431	15	15	68	Infinity	99.6753	Confident
C01R01	Q9WV98	Mitochondrial import inner membrane translocase subunit Tim9 (TIM9_MOUSE)	ENSMUSG00000021079	Timm9	12	GO:0008150, GO:0061024, GO:0055085, GO:0043167, GO:0008565, GO:0043234, GO:0043226, GO:0006810, GO:0005575, GO:0007005, GO:0005622, GO:0003674, GO:0006605, GO:0005623, GO:0005737, GO:0005739	mitochondrion organization, biological_process, organelle, protein transporter activity, transport, protein complex, cellular_component, cell, molecular_function, mitochondrion, cytoplasm, transmembrane transport, ion binding, membrane organization, protein targeting, intracellular	10.3372	100	29.21	29.21	113.602	0.0449438	0.519911	0.18099	2.09369	2	2	9	Infinity	99.6753	Confident
C01R01	Q8QZS1	3-hydroxyisobutyryl-CoA hydrolase, mitochondrial (HIBCH_MOUSE)	ENSMUSG00000041426	Hibch	1	GO:0044281, GO:0008150, GO:0005623, GO:0009056, GO:0005737, GO:0005739, GO:0006520, GO:0043226, GO:0005575, GO:0005622, GO:0003674	cytoplasm, catabolic process, cellular amino acid metabolic process, biological_process, small molecule metabolic process, organelle, cell, cellular_component, intracellular, mitochondrion, molecular_function	43.0102	90.13	9.35	9.35	49.7761	0.0196926	0.16203	0.0793025	0.652499	6	6	12	54.5058	90.0592	Confident
C01R01	Q60597	2-oxoglutarate dehydrogenase, mitochondrial (ODO1_MOUSE)	ENSMUSG00000020456	Ogdh	11	GO:0008150, GO:0006091, GO:0006790, GO:0040011, GO:0009056, GO:0043167, GO:0006464, GO:0048856, GO:0043234, GO:0043226, GO:0005575, GO:0003674, GO:0005622, GO:0048870, GO:0044281, GO:0005634, GO:0005623, GO:0005975, GO:0016491, GO:0005737, GO:0005739, GO:0051186, GO:0030154, GO:0034641	carbohydrate metabolic process, catabolic process, cell differentiation, cofactor metabolic process, biological_process, organelle, locomotion, nucleus, protein complex, cellular_component, cell, molecular_function, mitochondrion, cell motility, cytoplasm, ion binding, cellular nitrogen compound metabolic process, generation of precursor metabolites and energy, small molecule metabolic process, s…	116.375	72.43	1.27	1.27	12.7498	0.00504414	0.0219602	0.0203128	0.088434	8	8	11	Infinity	99.6753	Doubtful
C01R01	P56135	ATP synthase subunit f, mitochondrial (ATPK_MOUSE)	ENSMUSG00000038690	Atp5j2	5	GO:0016887, GO:0008150, GO:0043234, GO:0009058, GO:0043226, GO:0006810, GO:0005575, GO:0005622, GO:0003674, GO:0044281, GO:0005623, GO:0005737, GO:0005739, GO:0034641	biological_process, organelle, transport, protein complex, cellular_component, cell, atpase activity, molecular_function, mitochondrion, cytoplasm, cellular nitrogen compound metabolic process, biosynthetic process, small molecule metabolic process, intracellular	10.3374	100	36.36	36.36	222.606	0.0880682	0.668101	0.354652	2.69045	5	5	25	Infinity	99.6753	Confident
C01R01	P19157	Glutathione S-transferase P 1 (GSTP1_MOUSE)	ENSMUSG00000097830	Gstp1	CHR_MG153_PATCH	GO:0008283, GO:0006464, GO:0048856, GO:0007155, GO:0009058, GO:0043226, GO:0005575, GO:0003674, GO:0005623, GO:0008219, GO:0016491, GO:0051186, GO:0005829, GO:0034641, GO:0008150, GO:0006790, GO:0007165, GO:0043234, GO:0005886, GO:0006950, GO:0005622, GO:0005634, GO:0005737, GO:0005739, GO:0030154, GO:0030234, GO:0019899, GO:0016765	cell differentiation, transferase activity, transferring alkyl or aryl (other than methyl) groups, cellular_component, cell, protein complex, molecular_function, cytoplasm, cellular nitrogen compound metabolic process, biosynthetic process, cell adhesion, enzyme regulator activity, sulfur compound metabolic process, enzyme binding, cofactor metabolic process, cell proliferation, cell death, cytos…	23.5941	68.1	15.24	15.24	120.364	0.047619	0.274275	0.191763	1.10451	3	3	13	Infinity	99.6753	Confident
C01R01	P70404	Isocitrate dehydrogenase [NAD] subunit gamma 1, mitochondrial (IDHG1_MOUSE)	ENSMUSG00000002010	Idh3g	X	GO:0008150, GO:0006091, GO:0043167, GO:0005730, GO:0043226, GO:0005575, GO:0003674, GO:0005622, GO:0005654, GO:0044281, GO:0005623, GO:0005634, GO:0005737, GO:0016491, GO:0005739	nucleoplasm, biological_process, organelle, nucleus, cellular_component, cell, molecular_function, mitochondrion, cytoplasm, ion binding, generation of precursor metabolites and energy, small molecule metabolic process, nucleolus, oxidoreductase activity, intracellular	42.7582	73.28	13.23	11.2	100.199	0.0396412	0.251875	0.159636	1.01431	6	6	28	Infinity	99.6753	Confident
C01R01	Q04447	Creatine kinase B-type (KCRB_MOUSE)	ENSMUSG00000001270	Ckb	12	GO:0008150, GO:0043167, GO:0048856, GO:0043226, GO:0005575, GO:0003674, GO:0005622, GO:0005623, GO:0005634, GO:0005737, GO:0042592, GO:0005739, GO:0005829, GO:0016301, GO:0019899	enzyme binding, biological_process, cytosol, organelle, nucleus, cellular_component, cell, molecular_function, mitochondrion, cytoplasm, ion binding, kinase activity, homeostatic process, anatomical structure development, intracellular	42.6863	74.28	45.67	45.67	166.204	0.0657544	1.11349	0.264794	4.48404	15	15	89	Infinity	99.6753	Confident
C01R01	P20108	Thioredoxin-dependent peroxide reductase, mitochondrial (PRDX3_MOUSE)	ENSMUSG00000024997	Prdx3	19	GO:0008283, GO:0009056, GO:0006464, GO:0048856, GO:0009058, GO:0043226, GO:0005575, GO:0003674, GO:0005623, GO:0008219, GO:0005768, GO:0016491, GO:0051186, GO:0005829, GO:0031410, GO:0034641, GO:0008150, GO:0006950, GO:0005622, GO:0000003, GO:0007005, GO:0002376, GO:0005737, GO:0042592, GO:0005739, GO:0030154, GO:0030234, GO:0019899	cell differentiation, cellular_component, cell, molecular_function, cytoplasm, endosome, cellular nitrogen compound metabolic process, biosynthetic process, enzyme regulator activity, immune system process, homeostatic process, enzyme binding, mitochondrion organization, catabolic process, cofactor metabolic process, cell proliferation, cell death, cytosol, biological_process, organelle, mitochon…	28.1094	66.54	21.4	21.4	167.951	0.0664454	0.649648	0.267577	2.61615	6	6	46	Infinity	99.6753	Confident
C01R01	O35129	Prohibitin-2 (PHB2_MOUSE)	ENSMUSG00000004264	Phb2	6	GO:0008283, GO:0048856, GO:0006464, GO:0007059, GO:0009058, GO:0043226, GO:0005575, GO:0003674, GO:0000278, GO:0006913, GO:0005623, GO:0008219, GO:0140014, GO:0034641, GO:0008150, GO:0007165, GO:0006810, GO:0006950, GO:0005622, GO:0000003, GO:0007049, GO:0007005, GO:0005634, GO:0051276, GO:0005737, GO:0005739	mitotic cell cycle, cellular_component, cell, molecular_function, cytoplasm, cellular nitrogen compound metabolic process, biosynthetic process, mitotic nuclear division, mitochondrion organization, chromosome organization, cell proliferation, cell death, biological_process, signal transduction, cell cycle, organelle, nucleus, transport, mitochondrion, chromosome segregation, response to stress, …	33.2759	100	34.45	34.45	121.401	0.0480291	0.567191	0.193414	2.28409	12	12	42	Infinity	99.6753	Confident
C01R01	Q91VR2	ATP synthase subunit gamma, mitochondrial (ATPG_MOUSE)	ENSMUSG00000025781	Atp5c1	2	GO:0016887, GO:0008150, GO:0055085, GO:0022857, GO:0009058, GO:0043234, GO:0043226, GO:0005575, GO:0006810, GO:0003674, GO:0005622, GO:0044281, GO:0005623, GO:0005737, GO:0005739, GO:0034641	biological_process, transmembrane transporter activity, organelle, transport, protein complex, cellular_component, cell, atpase activity, molecular_function, mitochondrion, cytoplasm, transmembrane transport, cellular nitrogen compound metabolic process, biosynthetic process, small molecule metabolic process, intracellular	32.8651	73.49	23.15	23.15	313.195	0.123907	0.528307	0.498977	2.1275	11	11	64	Infinity	99.6753	Confident
C01R01	O35143	ATPase inhibitor, mitochondrial (ATIF1_MOUSE)	ENSMUSG00000054428	Atpif1	4	GO:0008283, GO:0009056, GO:0006461, GO:0022607, GO:0048856, GO:0009058, GO:0043226, GO:0005575, GO:0003674, GO:0044281, GO:0005623, GO:0008219, GO:0006914, GO:0051186, GO:0034641, GO:0061024, GO:0008150, GO:0065003, GO:0007165, GO:0043234, GO:0006810, GO:0006950, GO:0005622, GO:0007005, GO:0002376, GO:0006605, GO:0005737, GO:0042592, GO:0005739, GO:0030154, GO:0030234, GO:0019899	cell differentiation, cellular component assembly, cellular_component, cell, protein complex, molecular_function, cytoplasm, cellular nitrogen compound metabolic process, biosynthetic process, membrane organization, enzyme regulator activity, protein targeting, immune system process, homeostatic process, enzyme binding, mitochondrion organization, catabolic process, autophagy, cofactor metabolic …	12.1512	100	23.58	23.58	325.098	0.128616	0.823348	0.517941	3.31564	10	10	39	Infinity	99.6753	Confident
C01R01	Q9EQ20	Methylmalonate-semialdehyde dehydrogenase [acylating], mitochondrial (MMSA_MOUSE)	ENSMUSG00000021238	Aldh6a1	12	GO:0008150, GO:0009056, GO:0006520, GO:0043226, GO:0005575, GO:0003674, GO:0005622, GO:0005654, GO:0044281, GO:0005634, GO:0005623, GO:0005737, GO:0016491, GO:0005739, GO:0030154, GO:0034641	catabolic process, nucleoplasm, cell differentiation, cellular amino acid metabolic process, biological_process, organelle, nucleus, cellular_component, cell, molecular_function, mitochondrion, cytoplasm, cellular nitrogen compound metabolic process, small molecule metabolic process, oxidoreductase activity, intracellular	57.8785	76.45	11.03	11.03	27.7514	0.0109791	0.193777	0.0442131	0.780342	7	7	16	Infinity	99.6753	Confident
C01R01	Q99MN9	Propionyl-CoA carboxylase beta chain, mitochondrial (PCCB_MOUSE)	ENSMUSG00000032527	Pccb	9	GO:0008150, GO:0009056, GO:0043167, GO:0043226, GO:0005575, GO:0005622, GO:0003674, GO:0044281, GO:0005623, GO:0005737, GO:0006629, GO:0005739, GO:0016874	catabolic process, biological_process, organelle, cellular_component, cell, molecular_function, mitochondrion, cytoplasm, ion binding, small molecule metabolic process, lipid metabolic process, ligase activity, intracellular	58.3719	87.62	8.32	8.32	20.4416	0.0080872	0.128838	0.0325673	0.518833	7	7	12	Infinity	99.6753	Confident
C01R01	P52760	2-iminobutanoate/2-iminopropanoate deaminase (RIDA_MOUSE)	ENSMUSG00000022323	Rida	15	GO:0008283, GO:0008150, GO:0009056, GO:0048856, GO:0043167, GO:0008289, GO:0009058, GO:0043226, GO:0005575, GO:0003674, GO:0005622, GO:0007049, GO:0006412, GO:0005623, GO:0005634, GO:0005777, GO:0005737, GO:0005739, GO:0004518, GO:0005829, GO:0034641	catabolic process, cell proliferation, biological_process, cell cycle, cytosol, organelle, nucleus, peroxisome, cellular_component, cell, lipid binding, molecular_function, mitochondrion, cytoplasm, ion binding, nuclease activity, cellular nitrogen compound metabolic process, biosynthetic process, translation, anatomical structure development, intracellular	14.2465	80	36.3	36.3	212.198	0.0839506	0.637894	0.338071	2.56881	3	3	20	Infinity	99.6753	Confident
C01R01	Q8BMF4	Dihydrolipoyllysine-residue acetyltransferase component of pyruvate dehydrogenase complex, mitochondrial (ODP2_MOUSE)	ENSMUSG00000000168	Dlat	9	GO:0008150, GO:0006091, GO:0016746, GO:0006790, GO:0009058, GO:0043226, GO:0005575, GO:0005622, GO:0003674, GO:0044281, GO:0005975, GO:0005623, GO:0016491, GO:0005737, GO:0051186, GO:0005739, GO:0034641	carbohydrate metabolic process, cofactor metabolic process, biological_process, organelle, transferase activity, transferring acyl groups, cellular_component, cell, molecular_function, mitochondrion, cytoplasm, cellular nitrogen compound metabolic process, generation of precursor metabolites and energy, biosynthetic process, small molecule metabolic process, sulfur compound metabolic process, oxi…	67.8987	78.19	19.78	19.78	84.134	0.0332854	0.356291	0.134041	1.43479	13	13	61	Infinity	99.6753	Confident
C01R01	Q91VN4	MICOS complex subunit Mic25 (MIC25_MOUSE)	ENSMUSG00000030086	Chchd6	6	GO:0008150, GO:0061024, GO:0043234, GO:0043226, GO:0005575, GO:0003674, GO:0005622, GO:0006950, GO:0007005, GO:0005623, GO:0005737, GO:0005739, GO:0005829	mitochondrion organization, biological_process, cytosol, organelle, protein complex, cellular_component, cell, molecular_function, mitochondrion, cytoplasm, response to stress, membrane organization, intracellular	29.8334	80.95	10.26	10.26	28.5934	0.0113122	0.122018	0.0455545	0.491371	2	2	3	26.489	87.6136	Confident
C01R01	P26443	Glutamate dehydrogenase 1, mitochondrial (DHE3_MOUSE)	ENSMUSG00000021794	Glud1	14	GO:0008150, GO:0009056, GO:0007267, GO:0048856, GO:0043167, GO:0006520, GO:0009058, GO:0043226, GO:0005575, GO:0006810, GO:0005622, GO:0003674, GO:0044281, GO:0005623, GO:0016491, GO:0005737, GO:0005739, GO:0050877, GO:0019899	enzyme binding, catabolic process, nervous system process, cellular amino acid metabolic process, biological_process, cell-cell signaling, organelle, transport, cellular_component, cell, molecular_function, mitochondrion, cytoplasm, ion binding, biosynthetic process, small molecule metabolic process, oxidoreductase activity, anatomical structure development, intracellular	61.2982	88.35	37.46	37.46	150.002	0.0593443	0.839526	0.238981	3.38079	22	22	127	Infinity	99.6753	Confident
C01R01	Q8BMF3	NADP-dependent malic enzyme, mitochondrial (MAON_MOUSE)	ENSMUSG00000030621	Me3	7	GO:0044281, GO:0008150, GO:0005623, GO:0005737, GO:0016491, GO:0005739, GO:0043167, GO:0016829, GO:0043226, GO:0005575, GO:0005622, GO:0003674	cytoplasm, ion binding, biological_process, small molecule metabolic process, organelle, lyase activity, oxidoreductase activity, cell, cellular_component, intracellular, mitochondrion, molecular_function	67.0556	81.46	6.13	4.47	48.5239	0.0191972	0.0746078	0.0773075	0.300447	5	5	21	Infinity	99.6753	Doubtful
C01R01	Q91WD5	NADH dehydrogenase [ubiquinone] iron-sulfur protein 2, mitochondrial (NDUS2_MOUSE)	ENSMUSG00000013593	Ndufs2	1	GO:0008150, GO:0006091, GO:0043167, GO:0043234, GO:0043226, GO:0005575, GO:0006950, GO:0005622, GO:0003674, GO:0005654, GO:0044281, GO:0005634, GO:0005623, GO:0005737, GO:0016491, GO:0005739, GO:0034641, GO:0019899	enzyme binding, nucleoplasm, biological_process, organelle, nucleus, protein complex, cellular_component, cell, molecular_function, mitochondrion, cytoplasm, ion binding, cellular nitrogen compound metabolic process, generation of precursor metabolites and energy, response to stress, small molecule metabolic process, oxidoreductase activity, intracellular	52.5917	87.9	9.07	9.07	13.6482	0.00539957	0.0944998	0.0217442	0.380553	7	7	12	Infinity	99.6753	Confident
C01R01	Q6PB66	Leucine-rich PPR motif-containing protein, mitochondrial (LPPRC_MOUSE)	ENSMUSG00000024120	Lrpprc	17	GO:0009056, GO:0009058, GO:0005694, GO:0043226, GO:0005575, GO:0003674, GO:0005654, GO:0005623, GO:0003723, GO:0004518, GO:0034641, GO:0008150, GO:0000228, GO:0006810, GO:0005622, GO:0006412, GO:0005635, GO:0003677, GO:0005634, GO:0005856, GO:0005737, GO:0005739, GO:0034655, GO:0008092, GO:0019899	nucleoplasm, cellular_component, cell, rna binding, molecular_function, cytoplasm, cellular nitrogen compound metabolic process, biosynthetic process, cytoskeletal protein binding, enzyme binding, catabolic process, nucleobase-containing compound catabolic process, biological_process, cytoskeleton, organelle, chromosome, nuclear envelope, nucleus, transport, mitochondrion, nuclear chromosome, nuc…	156.516	85.63	0.93	0	1.90049	0.00075188	0.0140529	0.00302783	0.0565913	4	4	5	22.7741	87.5281	Doubtful
C01R01	P62075	Mitochondrial import inner membrane translocase subunit Tim13 (TIM13_MOUSE)	ENSMUSG00000020219	Timm13	10	GO:0008150, GO:0061024, GO:0055085, GO:0043167, GO:0008565, GO:0005730, GO:0043226, GO:0005575, GO:0006810, GO:0003674, GO:0005622, GO:0007005, GO:0005623, GO:0005634, GO:0006605, GO:0005737, GO:0005739	mitochondrion organization, biological_process, organelle, nucleus, protein transporter activity, transport, cellular_component, cell, molecular_function, mitochondrion, cytoplasm, transmembrane transport, ion binding, membrane organization, nucleolus, protein targeting, intracellular	10.4509	100	14.74	14.74	106.428	0.0421053	0.193777	0.169559	0.780342	4	4	7	Infinity	99.6753	Doubtful
C01R01	Q8BMS1	Trifunctional enzyme subunit alpha, mitochondrial (ECHA_MOUSE)	ENSMUSG00000025745	Hadha	5	GO:0008150, GO:0016746, GO:0009056, GO:0016829, GO:0043167, GO:0005576, GO:0043226, GO:0005575, GO:0003674, GO:0005622, GO:0044281, GO:0005623, GO:0016491, GO:0005737, GO:0006629, GO:0005739	catabolic process, biological_process, organelle, transferase activity, transferring acyl groups, extracellular region, cellular_component, cell, molecular_function, mitochondrion, cytoplasm, ion binding, small molecule metabolic process, lyase activity, lipid metabolic process, oxidoreductase activity, intracellular	82.6175	78.77	7.86	7.86	44.2436	0.0175038	0.099606	0.0704882	0.401115	7	7	36	Infinity	99.6753	Confident
C01R01	P63101	14-3-3 protein zeta/delta (1433Z_MOUSE)	ENSMUSG00000022285	Ywhaz	15	GO:0008150, GO:0022607, GO:0008134, GO:0043226, GO:0005575, GO:0006810, GO:0005622, GO:0003674, GO:0005623, GO:0006605, GO:0005634, GO:0008219, GO:0005737, GO:0005739, GO:0031410, GO:0005829, GO:0019899	enzyme binding, cell death, biological_process, cytosol, cellular component assembly, organelle, transcription factor binding, nucleus, transport, cellular_component, cell, molecular_function, mitochondrion, cytoplasm, cytoplasmic vesicle, protein targeting, intracellular	27.7537	100	53.47	53.47	173.094	0.0684802	1.5483	0.275771	6.23502	17	13	77	Infinity	99.6753	Confident
C01R01	P14152	Malate dehydrogenase, cytoplasmic (MDHC_MOUSE)	ENSMUSG00000020321	Mdh1	11	GO:0008150, GO:0006091, GO:0043226, GO:0005575, GO:0003674, GO:0005622, GO:0044281, GO:0005623, GO:0005975, GO:0016491, GO:0005737, GO:0005739, GO:0051186, GO:0005829, GO:0034641	carbohydrate metabolic process, cofactor metabolic process, biological_process, cytosol, organelle, cellular_component, cell, molecular_function, mitochondrion, cytoplasm, cellular nitrogen compound metabolic process, generation of precursor metabolites and energy, small molecule metabolic process, oxidoreductase activity, intracellular	36.4881	68.56	38.92	38.92	224.744	0.0889142	0.961927	0.358059	3.8737	16	16	95	Infinity	99.6753	Confident
C01R01	P10605	Cathepsin B (CATB_MOUSE)	ENSMUSG00000021939	Ctsb	14	GO:0008150, GO:0009056, GO:0048856, GO:0008233, GO:0043226, GO:0044403, GO:0005576, GO:0005730, GO:0005773, GO:0005575, GO:0005622, GO:0003674, GO:0000003, GO:0005764, GO:0005623, GO:0005634, GO:0005615, GO:0005737, GO:0005739, GO:0030154, GO:0031410	catabolic process, cell differentiation, vacuole, biological_process, organelle, extracellular region, nucleus, peptidase activity, symbiont process, cellular_component, cell, molecular_function, mitochondrion, cytoplasm, cytoplasmic vesicle, nucleolus, extracellular space, anatomical structure development, intracellular, lysosome, reproduction	37.2557	58.11	9.14	9.14	50.1077	0.0198238	0.193777	0.0798308	0.780342	3	3	10	Infinity	99.6753	Confident
C01R01	P70296	Phosphatidylethanolamine-binding protein 1 (PEBP1_MOUSE)	ENSMUSG00000032959	Pebp1	5	GO:0048856, GO:0043167, GO:0006464, GO:0008289, GO:0005794, GO:0043226, GO:0005576, GO:0005575, GO:0003013, GO:0000278, GO:0003674, GO:0005623, GO:0140014, GO:0031410, GO:0034641, GO:0008150, GO:0007165, GO:0005783, GO:0021700, GO:0007568, GO:0006950, GO:0007049, GO:0000003, GO:0005622, GO:0005615, GO:0005737, GO:0005739, GO:0030154, GO:0030234, GO:0019899	cell differentiation, extracellular region, mitotic cell cycle, cellular_component, cell, molecular_function, developmental maturation, cytoplasm, ion binding, cellular nitrogen compound metabolic process, enzyme regulator activity, mitotic nuclear division, extracellular space, enzyme binding, biological_process, signal transduction, cell cycle, organelle, lipid binding, mitochondrion, circulato…	20.8173	72.73	32.62	32.62	190.363	0.0753119	0.668101	0.303283	2.69045	5	5	23	Infinity	99.6753	Confident
C01R01	Q91V61	Sideroflexin-3 (SFXN3_MOUSE)	ENSMUSG00000025212	Sfxn3	19	GO:0005623, GO:0008150, GO:0055085, GO:0022857, GO:0005737, GO:0042592, GO:0005739, GO:0043226, GO:0006810, GO:0005575, GO:0003674, GO:0005622	cytoplasm, transmembrane transport, biological_process, transmembrane transporter activity, organelle, homeostatic process, transport, cell, cellular_component, intracellular, mitochondrion, molecular_function	35.3835	81	38.01	38.01	101.632	0.040208	0.84785	0.161918	3.41431	10	8	31	Infinity	99.6753	Confident
C01R01	Q80XN0	D-beta-hydroxybutyrate dehydrogenase, mitochondrial (BDH_MOUSE)	ENSMUSG00000046598	Bdh1	16	GO:0008150, GO:0005634, GO:0005623, GO:0016491, GO:0005737, GO:0005739, GO:0043226, GO:0005575, GO:0005622, GO:0003674, GO:0005654	cytoplasm, nucleoplasm, biological_process, organelle, nucleus, oxidoreductase activity, cell, cellular_component, intracellular, mitochondrion, molecular_function	38.2744	83.38	8.75	8.75	64.8116	0.025641	0.107757	0.103257	0.433939	3	3	15	Infinity	99.6753	Confident
C01R01	Q99LC5	Electron transfer flavoprotein subunit alpha, mitochondrial (ETFA_MOUSE)	ENSMUSG00000032314	Etfa	9	GO:0008150, GO:0006091, GO:0009056, GO:0043167, GO:0043234, GO:0043226, GO:0005575, GO:0005622, GO:0003674, GO:0044281, GO:0005623, GO:0016491, GO:0005737, GO:0006629, GO:0005739	catabolic process, biological_process, organelle, protein complex, cellular_component, cell, molecular_function, mitochondrion, cytoplasm, ion binding, generation of precursor metabolites and energy, small molecule metabolic process, lipid metabolic process, oxidoreductase activity, intracellular	34.9875	91.59	38.74	35.74	81.6707	0.0323109	0.564748	0.130117	2.27425	8	8	34	Infinity	99.6753	Confident
C01R01	Q99LC3	NADH dehydrogenase [ubiquinone] 1 alpha subcomplex subunit 10, mitochondrial (NDUAA_MOUSE)	ENSMUSG00000026260	Ndufa10	1	GO:0008150, GO:0006091, GO:0065003, GO:0006461, GO:0022607, GO:0043234, GO:0043226, GO:0005575, GO:0003674, GO:0007005, GO:0005622, GO:0044281, GO:0005623, GO:0016491, GO:0005737, GO:0005739, GO:0034641	mitochondrion organization, biological_process, cellular component assembly, organelle, macromolecular complex assembly, protein complex, cellular_component, cell, molecular_function, mitochondrion, cytoplasm, cellular nitrogen compound metabolic process, generation of precursor metabolites and energy, small molecule metabolic process, protein complex assembly, oxidoreductase activity, intracellu…	40.5777	76.9	19.15	19.15	61.561	0.024355	0.30701	0.0980781	1.23634	7	7	29	Infinity	99.6753	Confident
C01R01	Q8K4Z3	NAD(P)H-hydrate epimerase (NNRE_MOUSE)	ENSMUSG00000028070	Naxe	3	GO:0008150, GO:0065003, GO:0006461, GO:0022607, GO:0043167, GO:0005576, GO:0043226, GO:0005575, GO:0005622, GO:0003674, GO:0005654, GO:0044281, GO:0005623, GO:0005634, GO:0005615, GO:0005737, GO:0051186, GO:0005739, GO:0005929, GO:0005829, GO:0034641, GO:0016853	nucleoplasm, cofactor metabolic process, biological_process, cytosol, cellular component assembly, organelle, extracellular region, nucleus, macromolecular complex assembly, cellular_component, cell, molecular_function, mitochondrion, cytoplasm, cilium, ion binding, cellular nitrogen compound metabolic process, small molecule metabolic process, isomerase activity, protein complex assembly, extrac…	30.9528	63.83	12.06	12.06	172.522	0.068254	0.333521	0.27486	1.3431	3	3	18	Infinity	99.6753	Confident
C01R01	Q80Y14	Glutaredoxin-related protein 5, mitochondrial (GLRX5_MOUSE)	ENSMUSG00000021102	Glrx5	12	GO:0008150, GO:0006091, GO:0043167, GO:0048856, GO:0006464, GO:0043226, GO:0005575, GO:0003674, GO:0002376, GO:0005622, GO:0005623, GO:0005634, GO:0005737, GO:0016491, GO:0042592, GO:0005739, GO:0051604	protein maturation, biological_process, organelle, nucleus, cellular_component, cell, molecular_function, mitochondrion, cytoplasm, ion binding, generation of precursor metabolites and energy, cellular protein modification process, immune system process, oxidoreductase activity, homeostatic process, anatomical structure development, intracellular	16.2824	75	9.21	9.21	243.896	0.0964912	0.145048	0.388572	0.584109	2	2	13	Infinity	99.6753	Doubtful
C01R01	Q9CZW5	Mitochondrial import receptor subunit TOM70 (TOM70_MOUSE)		Tomm70		GO:0005623, GO:0005737, GO:0005739, GO:0043226, GO:0005575, GO:0003674, GO:0005622	cytoplasm, organelle, cell, cellular_component, intracellular, mitochondrion, molecular_function	67.5469	83.63	7.53	7.53	32.9489	0.0130354	0.089023	0.0524937	0.358497	7	7	18	Infinity	99.6753	Confident
C01R01	Q9WTP7	GTP:AMP phosphotransferase AK3, mitochondrial (KAD3_MOUSE)	ENSMUSG00000024782	Ak3	19	GO:0044281, GO:0005623, GO:0008150, GO:0005737, GO:0005739, GO:0043167, GO:0034641, GO:0043226, GO:0005575, GO:0016301, GO:0003674, GO:0005622	cytoplasm, ion binding, cellular nitrogen compound metabolic process, biological_process, kinase activity, small molecule metabolic process, organelle, cell, cellular_component, intracellular, mitochondrion, molecular_function	25.4105	100	17.62	17.62	61.2427	0.0242291	0.279802	0.097571	1.12677	4	4	11	Infinity	99.6753	Confident
C01R01	Q99LY9	NADH dehydrogenase [ubiquinone] iron-sulfur protein 5 (NDUS5_MOUSE)	ENSMUSG00000028648	Ndufs5	4	GO:0008150, GO:0065003, GO:0006461, GO:0022607, GO:0043234, GO:0043226, GO:0005575, GO:0005622, GO:0007005, GO:0003674, GO:0005623, GO:0005737, GO:0005739	mitochondrion organization, biological_process, cellular component assembly, organelle, macromolecular complex assembly, protein complex, cellular_component, cell, molecular_function, mitochondrion, cytoplasm, protein complex assembly, intracellular	12.6393	100	9.43	9.43	23.8458	0.00943396	0.110336	0.0379908	0.444327	1	1	2	Infinity	99.6753	Doubtful
C01R01	Q99LX0	Protein DJ-1 (PARK7_MOUSE)	ENSMUSG00000028964	Park7	4	GO:0008283, GO:0009056, GO:0006464, GO:0043167, GO:0016829, GO:0006520, GO:0005694, GO:0009058, GO:0043226, GO:0005575, GO:0003674, GO:0005654, GO:0044281, GO:0005623, GO:0006913, GO:0008219, GO:0003723, GO:0016491, GO:0006914, GO:0051186, GO:0003729, GO:0005829, GO:0034641, GO:0008150, GO:0006091, GO:0055085, GO:0006790, GO:0007165, GO:0007267, GO:0000988, GO:0005783, GO:0043234, GO:0008233, GO:…	nucleoplasm, cellular amino acid metabolic process, cell-cell signaling, transcription factor binding, cellular_component, cell, rna binding, protein complex, molecular_function, transcription factor activity, protein binding, cytoplasm, ion binding, cellular nitrogen compound metabolic process, mrna binding, biosynthetic process, enzyme regulator activity, sulfur compound metabolic process, immu…	20.0084	85.71	40.74	36.51	109.442	0.0432981	0.649648	0.174362	2.61615	5	5	25	Infinity	99.6753	Confident
C01R01	Q9CZU6	Citrate synthase, mitochondrial (CISY_MOUSE)	ENSMUSG00000005683	Cs	10	GO:0044281, GO:0005623, GO:0005975, GO:0008150, GO:0006091, GO:0016746, GO:0005737, GO:0005739, GO:0043226, GO:0005575, GO:0005622, GO:0003674	carbohydrate metabolic process, cytoplasm, generation of precursor metabolites and energy, biological_process, small molecule metabolic process, organelle, transferase activity, transferring acyl groups, cell, cellular_component, intracellular, mitochondrion, molecular_function	51.7034	64.87	35.13	33.19	125.273	0.049561	1.15443	0.199583	4.64893	20	20	80	Infinity	99.6753	Confident
C01R01	P63085	Mitogen-activated protein kinase 1 (MK01_MOUSE)	ENSMUSG00000063358	Mapk1	16	GO:0009790, GO:0007010, GO:0005794, GO:0043226, GO:0044281, GO:0005623, GO:0006913, GO:0008219, GO:0005829, GO:0050877, GO:0008150, GO:0007267, GO:0048646, GO:0006259, GO:0004871, GO:0006810, GO:0002376, GO:0005886, GO:0006412, GO:0005634, GO:0006605, GO:0042592, GO:0008283, GO:0040011, GO:0043167, GO:0048856, GO:0006464, GO:0009058, GO:0005575, GO:0003674, GO:0005654, GO:0005768, GO:0016192, GO:…	cell-cell signaling, anatomical structure formation involved in morphogenesis, transcription factor binding, molecular_function, protein targeting, immune system process, homeostatic process, enzyme binding, nervous system process, signal transduction, cytoskeleton, organelle, mitochondrion, cell motility, signal transducer activity, response to stress, kinase activity, small molecule metabolic p…	41.2492	84.08	10.34	7.82	25.8884	0.0102421	0.183507	0.0412451	0.738985	4	3	12	46.9031	90.1176	Confident
C01R01	P99029	Peroxiredoxin-5, mitochondrial (PRDX5_MOUSE)	ENSMUSG00000024953	Prdx5	19	GO:0008150, GO:0009056, GO:0009058, GO:0043226, GO:0005575, GO:0003674, GO:0005622, GO:0006950, GO:0044281, GO:0005777, GO:0003677, GO:0005634, GO:0005623, GO:0008219, GO:0016491, GO:0005737, GO:0042592, GO:0005739, GO:0051186, GO:0005829, GO:0031410, GO:0034641, GO:0030234	catabolic process, cofactor metabolic process, cell death, biological_process, cytosol, organelle, peroxisome, nucleus, cellular_component, cell, molecular_function, mitochondrion, cytoplasm, cytoplasmic vesicle, cellular nitrogen compound metabolic process, biosynthetic process, response to stress, small molecule metabolic process, enzyme regulator activity, dna binding, oxidoreductase activity,…	21.8835	100	38.1	38.1	218.719	0.0865306	1.03092	0.348461	4.15153	9	9	59	Infinity	99.6753	Confident
C01R01	Q91VD9	NADH-ubiquinone oxidoreductase 75 kDa subunit, mitochondrial (NDUS1_MOUSE)	ENSMUSG00000025968	Ndufs1	1	GO:0008150, GO:0006091, GO:0043167, GO:0043234, GO:0043226, GO:0005575, GO:0003674, GO:0005622, GO:0007005, GO:0044281, GO:0005623, GO:0008219, GO:0016491, GO:0005737, GO:0005739, GO:0034641	mitochondrion organization, cell death, biological_process, organelle, protein complex, cellular_component, cell, molecular_function, mitochondrion, cytoplasm, ion binding, cellular nitrogen compound metabolic process, generation of precursor metabolites and energy, small molecule metabolic process, oxidoreductase activity, intracellular	79.7256	73.87	28.34	28.34	56.5949	0.0223903	0.557068	0.0901661	2.24333	20	20	92	Infinity	99.6753	Confident
C01R01	Q99LP6	GrpE protein homolog 1, mitochondrial (GRPE1_MOUSE)	ENSMUSG00000029198	Grpel1	5	GO:0008150, GO:0055085, GO:0051082, GO:0043234, GO:0043226, GO:0006457, GO:0005575, GO:0006810, GO:0003674, GO:0005622, GO:0007005, GO:0005634, GO:0005623, GO:0006605, GO:0005737, GO:0005739, GO:0030234	mitochondrion organization, biological_process, organelle, nucleus, transport, protein complex, cellular_component, cell, molecular_function, mitochondrion, cytoplasm, transmembrane transport, enzyme regulator activity, protein targeting, protein folding, intracellular, unfolded protein binding	24.2919	100	5.07	5.07	11.6482	0.00460829	0.0722672	0.0185577	0.291022	1	1	5	Infinity	99.6753	Doubtful
C01R01	Q91V92	ATP-citrate synthase (ACLY_MOUSE)	ENSMUSG00000020917	Acly	11	GO:0008150, GO:0016746, GO:0006790, GO:0043167, GO:0043234, GO:0009058, GO:0043226, GO:0005575, GO:0005622, GO:0003674, GO:0005886, GO:0005654, GO:0044281, GO:0005623, GO:0005634, GO:0005737, GO:0006629, GO:0051186, GO:0005739, GO:0005829	nucleoplasm, cofactor metabolic process, biological_process, plasma membrane, cytosol, organelle, transferase activity, transferring acyl groups, nucleus, protein complex, cellular_component, cell, molecular_function, mitochondrion, cytoplasm, ion binding, biosynthetic process, small molecule metabolic process, lipid metabolic process, sulfur compound metabolic process, intracellular	119.651	78.37	5.59	5.59	10.1008	0.0039961	0.0857111	0.0160924	0.34516	6	6	12	Infinity	99.6753	Confident
C01R01	P38060	Hydroxymethylglutaryl-CoA lyase, mitochondrial (HMGCL_MOUSE)	ENSMUSG00000028672	Hmgcl	4	GO:0008150, GO:0006790, GO:0065003, GO:0006461, GO:0022607, GO:0043167, GO:0048856, GO:0016829, GO:0009058, GO:0043226, GO:0005575, GO:0005622, GO:0003674, GO:0006950, GO:0007005, GO:0044281, GO:0005777, GO:0005623, GO:0005737, GO:0005739, GO:0006629, GO:0051186	mitochondrion organization, cofactor metabolic process, biological_process, cellular component assembly, organelle, peroxisome, macromolecular complex assembly, cellular_component, cell, molecular_function, mitochondrion, cytoplasm, ion binding, biosynthetic process, response to stress, small molecule metabolic process, lyase activity, lipid metabolic process, sulfur compound metabolic process, p…	34.2167	74.46	4.31	4.31	37.4467	0.0148148	0.0746078	0.0596596	0.300447	2	2	9	25.8495	87.6557	Doubtful
C01R01	P08249	Malate dehydrogenase, mitochondrial (MDHM_MOUSE)	ENSMUSG00000019179	Mdh2	5	GO:0008150, GO:0006091, GO:0006464, GO:0043226, GO:0005575, GO:0003674, GO:0005622, GO:0044281, GO:0005623, GO:0005975, GO:0016491, GO:0005737, GO:0051186, GO:0005739, GO:0034641	carbohydrate metabolic process, cofactor metabolic process, biological_process, organelle, cellular_component, cell, molecular_function, mitochondrion, cytoplasm, cellular nitrogen compound metabolic process, generation of precursor metabolites and energy, small molecule metabolic process, cellular protein modification process, oxidoreductase activity, intracellular	35.5888	86.39	57.1	57.1	235.389	0.0931254	2.38386	0.375018	9.59983	18	18	116	Infinity	99.6753	Confident
C01R01	P63011	Ras-related protein Rab-3A (RAB3A_MOUSE)	ENSMUSG00000111277	Rab3a	CHR_MG190_MG3751_PATCH	GO:0043167, GO:0048856, GO:0043226, GO:0005575, GO:0003674, GO:0005623, GO:0005768, GO:0016192, GO:0003924, GO:0031410, GO:0005829, GO:0050877, GO:0008150, GO:0061024, GO:0000902, GO:0007267, GO:0021700, GO:0006810, GO:0005622, GO:0005886, GO:0007005, GO:0005737, GO:0030154, GO:0008092, GO:0030234, GO:0019899	cell differentiation, cell-cell signaling, gtpase activity, cellular_component, cell, molecular_function, developmental maturation, cytoplasm, ion binding, endosome, membrane organization, enzyme regulator activity, cell morphogenesis, cytoskeletal protein binding, enzyme binding, mitochondrion organization, nervous system process, cytosol, biological_process, plasma membrane, organelle, transpor…	24.9541	87.27	52.73	52.73	154.493	0.0611212	1.51189	0.246136	6.0884	11	6	62	Infinity	99.6753	Confident
C01R01	P63038	60 kDa heat shock protein, mitochondrial (CH60_MOUSE)	ENSMUSG00000025980	Hspd1	1	GO:0008283, GO:0043167, GO:0048856, GO:0007155, GO:0005794, GO:0008289, GO:0009058, GO:0005576, GO:0043226, GO:0005575, GO:0003674, GO:0005623, GO:0003723, GO:0008219, GO:0005768, GO:0005829, GO:0031410, GO:0034641, GO:0008150, GO:0055085, GO:0007165, GO:0051082, GO:0005783, GO:0043234, GO:0044403, GO:0006259, GO:0006457, GO:0006810, GO:0006950, GO:0005622, GO:0005886, GO:0002376, GO:0007005, GO:…	extracellular region, cellular_component, cell, rna binding, protein complex, molecular_function, cytoplasm, ion binding, endosome, cellular nitrogen compound metabolic process, biosynthetic process, cell adhesion, protein targeting, protein folding, immune system process, extracellular space, unfolded protein binding, enzyme binding, mitochondrion organization, cell proliferation, cell death, dn…	60.9174	86.04	51.48	51.31	102.692	0.0406272	1.27072	0.163607	5.11723	32	32	167	Infinity	99.6753	Confident
C01R01	Q99KE1	NAD-dependent malic enzyme, mitochondrial (MAOM_MOUSE)	ENSMUSG00000024556	Me2	18	GO:0008150, GO:0043167, GO:0016829, GO:0043226, GO:0005575, GO:0005622, GO:0003674, GO:0044281, GO:0005623, GO:0005737, GO:0016491, GO:0005739, GO:0051186, GO:0034641	cofactor metabolic process, biological_process, organelle, cellular_component, cell, molecular_function, mitochondrion, cytoplasm, ion binding, cellular nitrogen compound metabolic process, small molecule metabolic process, lyase activity, oxidoreductase activity, intracellular	65.7569	69.44	2.55	2.55	19.4062	0.00767754	0.0378367	0.0309176	0.152369	4	4	7	Infinity	99.6753	Doubtful
C01R01	Q925N0	Sideroflexin-5 (SFXN5_MOUSE)	ENSMUSG00000033720	Sfxn5	6	GO:0005623, GO:0008150, GO:0055085, GO:0022857, GO:0005737, GO:0042592, GO:0005739, GO:0043226, GO:0006810, GO:0005575, GO:0005622, GO:0003674	cytoplasm, transmembrane transport, biological_process, transmembrane transporter activity, organelle, homeostatic process, transport, cell, cellular_component, intracellular, mitochondrion, molecular_function	37.3049	58.19	9.06	6.43	50.7788	0.0200893	0.178769	0.0809	0.719905	5	5	14	Infinity	99.6753	Doubtful
C01R01	Q9CYH2	Redox-regulatory protein FAM213A (F213A_MOUSE)	ENSMUSG00000021792	Fam213a	14	GO:0005623, GO:0008150, GO:0005737, GO:0005739, GO:0048856, GO:0030154, GO:0043226, GO:0005576, GO:0005575, GO:0003674, GO:0002376, GO:0005622	cytoplasm, cell differentiation, biological_process, organelle, extracellular region, immune system process, cell, anatomical structure development, cellular_component, intracellular, mitochondrion, molecular_function	24.3789	73.85	5.5	5.05	60.5023	0.0239362	0.154782	0.0963914	0.62331	4	4	9	Infinity	99.6753	Doubtful
C01R01	Q99KI0	Aconitate hydratase, mitochondrial (ACON_MOUSE)	ENSMUSG00000022477	Aco2	15	GO:0008150, GO:0006091, GO:0016829, GO:0048856, GO:0043167, GO:0043226, GO:0005575, GO:0005622, GO:0006950, GO:0003674, GO:0044281, GO:0005623, GO:0005737, GO:0005739	biological_process, organelle, cellular_component, cell, molecular_function, mitochondrion, cytoplasm, ion binding, generation of precursor metabolites and energy, response to stress, small molecule metabolic process, lyase activity, anatomical structure development, intracellular	85.41	76.54	47.05	47.05	99.4577	0.0393478	1.39503	0.158455	5.6178	39	39	230	Infinity	99.6753	Confident
C01R01	P16858	Glyceraldehyde-3-phosphate dehydrogenase (G3P_MOUSE)	ENSMUSG00000057666	Gapdh	6	GO:0007010, GO:0009056, GO:0048856, GO:0006464, GO:0009058, GO:0043226, GO:0005576, GO:0005575, GO:0003674, GO:0044281, GO:0005623, GO:0008219, GO:0016491, GO:0051186, GO:0005829, GO:0034641, GO:0008150, GO:0006091, GO:0043234, GO:0044403, GO:0006810, GO:0002376, GO:0005622, GO:0005886, GO:0006950, GO:0006412, GO:0005635, GO:0005811, GO:0005634, GO:0005975, GO:0005856, GO:0005737, GO:0005739, GO:…	carbohydrate metabolic process, extracellular region, cellular_component, cell, protein complex, molecular_function, cytoplasm, cellular nitrogen compound metabolic process, biosynthetic process, enzyme regulator activity, immune system process, cytoskeletal protein binding, lipid droplet, enzyme binding, catabolic process, cofactor metabolic process, cytoskeleton organization, cell death, cytoso…	35.7872	80.18	58.56	56.16	247.513	0.097922	1.86512	0.394334	7.51088	21	18	153	Infinity	99.6753	Confident
C01R01	P15532	Nucleoside diphosphate kinase A (NDKA_MOUSE)	ENSMUSG00000037601	Nme1	11	GO:0008283, GO:0048856, GO:0043167, GO:0009058, GO:0043226, GO:0005575, GO:0003674, GO:0044281, GO:0005623, GO:0008219, GO:0016192, GO:0004518, GO:0005829, GO:0034641, GO:0008150, GO:0006259, GO:0006810, GO:0005886, GO:0005622, GO:0002376, GO:0005634, GO:0003677, GO:0005856, GO:0005815, GO:0005737, GO:0042592, GO:0005739, GO:0030154, GO:0008092, GO:0016301, GO:0019899	cell differentiation, cellular_component, cell, molecular_function, cytoplasm, ion binding, cellular nitrogen compound metabolic process, biosynthetic process, immune system process, homeostatic process, cytoskeletal protein binding, enzyme binding, cell proliferation, cell death, dna metabolic process, cytosol, biological_process, plasma membrane, cytoskeleton, organelle, nucleus, transport, mit…	17.1969	100	38.82	38.82	101.439	0.0401316	0.895736	0.161611	3.60715	8	8	20	Infinity	99.6753	Confident
C01R01	P68037	Ubiquitin-conjugating enzyme E2 L3 (UB2L3_MOUSE)	ENSMUSG00000038965	Ube2l3	16	GO:0008283, GO:0008150, GO:0043167, GO:0000988, GO:0006464, GO:0009058, GO:0043226, GO:0006810, GO:0005575, GO:0007005, GO:0003674, GO:0007049, GO:0005622, GO:0006605, GO:0005634, GO:0005623, GO:0005737, GO:0034641, GO:0030234, GO:0019899	enzyme binding, mitochondrion organization, cell proliferation, biological_process, cell cycle, organelle, nucleus, transport, cellular_component, cell, molecular_function, transcription factor activity, protein binding, cytoplasm, ion binding, cellular nitrogen compound metabolic process, biosynthetic process, enzyme regulator activity, protein targeting, cellular protein modification process, i…	17.8502	83.77	24.03	24.03	82.0667	0.0324675	0.211528	0.130747	0.851826	5	5	17	Infinity	99.6753	Confident
C01R01	P32020	Non-specific lipid-transfer protein (NLTP_MOUSE)	ENSMUSG00000028603	Scp2	4	GO:0061024, GO:0008150, GO:0016746, GO:0006790, GO:0043167, GO:0008289, GO:0009058, GO:0043226, GO:0005575, GO:0006810, GO:0005622, GO:0003674, GO:0005654, GO:0044281, GO:0005634, GO:0005777, GO:0005623, GO:0007009, GO:0005737, GO:0005739, GO:0051186, GO:0006629	nucleoplasm, cofactor metabolic process, biological_process, organelle, transferase activity, transferring acyl groups, nucleus, peroxisome, transport, cellular_component, cell, lipid binding, molecular_function, mitochondrion, cytoplasm, plasma membrane organization, ion binding, biosynthetic process, membrane organization, small molecule metabolic process, lipid metabolic process, sulfur compou…	59.0878	70.93	3.66	3.66	9.09228	0.00359712	0.0826367	0.0144857	0.33278	5	5	7	Infinity	99.6753	Confident
C01R01	P46638	Ras-related protein Rab-11B (RB11B_MOUSE)	ENSMUSG00000077450	Rab11b	17	GO:0008150, GO:0007267, GO:0043167, GO:0043226, GO:0006810, GO:0005575, GO:0005622, GO:0003674, GO:0005623, GO:0005768, GO:0016192, GO:0005737, GO:0043473, GO:0003924, GO:0042592, GO:0005739, GO:0031410, GO:0008092	biological_process, cell-cell signaling, organelle, gtpase activity, transport, cellular_component, cell, molecular_function, mitochondrion, cytoplasm, pigmentation, ion binding, endosome, cytoplasmic vesicle, homeostatic process, cytoskeletal protein binding, intracellular, vesicle-mediated transport	24.4745	87.61	41.74	41.74	136.073	0.0538336	0.8166	0.216789	3.28846	8	8	33	Infinity	99.6753	Confident
C01R01	P20029	78 kDa glucose-regulated protein (GRP78_MOUSE)	ENSMUSG00000026864	Hspa5	2	GO:0016887, GO:0009790, GO:0040011, GO:0009056, GO:0043167, GO:0006464, GO:0048856, GO:0043226, GO:0005576, GO:0005575, GO:0003674, GO:0005623, GO:0008219, GO:0034641, GO:0008150, GO:0007165, GO:0051082, GO:0005783, GO:0043234, GO:0006810, GO:0005622, GO:0006950, GO:0005886, GO:0048870, GO:0005634, GO:0005737, GO:0005739, GO:0030154, GO:0019899	cell differentiation, locomotion, embryo development, extracellular region, cellular_component, cell, protein complex, molecular_function, cytoplasm, ion binding, cellular nitrogen compound metabolic process, unfolded protein binding, enzyme binding, catabolic process, cell death, biological_process, signal transduction, plasma membrane, organelle, nucleus, transport, atpase activity, mitochondri…	72.3775	85.95	27.18	27.18	38.9992	0.015429	0.41067	0.062133	1.65377	15	13	43	Infinity	99.6753	Confident
C01R01	Q8VEM8	Phosphate carrier protein, mitochondrial (MPCP_MOUSE)	ENSMUSG00000061904	Slc25a3	10	GO:0005623, GO:0008150, GO:0055085, GO:0022857, GO:0005737, GO:0005739, GO:0043226, GO:0006810, GO:0005575, GO:0003674, GO:0005622	cytoplasm, transmembrane transport, biological_process, transmembrane transporter activity, organelle, transport, cell, cellular_component, intracellular, mitochondrion, molecular_function	39.6065	75.63	22.13	22.13	175.43	0.0694042	0.995262	0.279492	4.00794	15	15	76	Infinity	99.6753	Confident
C01R01	Q8BKZ9	Pyruvate dehydrogenase protein X component, mitochondrial (ODPX_MOUSE)	ENSMUSG00000010914	Pdhx	2	GO:0008150, GO:0016746, GO:0006790, GO:0009058, GO:0043226, GO:0005575, GO:0003674, GO:0005622, GO:0044281, GO:0005623, GO:0016491, GO:0005737, GO:0051186, GO:0005739, GO:0034641	cofactor metabolic process, biological_process, organelle, transferase activity, transferring acyl groups, cellular_component, cell, molecular_function, mitochondrion, cytoplasm, cellular nitrogen compound metabolic process, biosynthetic process, small molecule metabolic process, sulfur compound metabolic process, oxidoreductase activity, intracellular	53.9652	69.86	5.19	5.19	87.592	0.0346535	0.0873357	0.13955	0.351703	6	6	27	Infinity	99.6753	Confident
C01R01	P10637	Microtubule-associated protein tau (TAU_MOUSE)	ENSMUSG00000018411	Mapt	11	GO:0007010, GO:0009056, GO:0040011, GO:0006461, GO:0022607, GO:0006464, GO:0048856, GO:0043226, GO:0005575, GO:0003674, GO:0005654, GO:0005623, GO:0008219, GO:0030705, GO:0006914, GO:0005929, GO:0005829, GO:0050877, GO:0008150, GO:0065003, GO:0007165, GO:0000902, GO:0043234, GO:0004871, GO:0006810, GO:0005886, GO:0006950, GO:0040007, GO:0005622, GO:0007005, GO:0048870, GO:0003677, GO:0005634, GO:…	nucleoplasm, cell differentiation, cellular component assembly, locomotion, cellular_component, cell, protein complex, molecular_function, cytoplasm, cilium, cell morphogenesis, cytoskeletal protein binding, enzyme binding, mitochondrion organization, catabolic process, nervous system process, autophagy, cytoskeleton organization, cell death, cytosol, biological_process, signal transduction, plas…	76.1973	67.53	16.92	15.14	87.9778	0.0348061	0.367107	0.140165	1.47835	14	14	84	Infinity	99.6753	Confident
C01R01	Q99L04	Dehydrogenase/reductase SDR family member 1 (DHRS1_MOUSE)	ENSMUSG00000002332	Dhrs1	14	GO:0008150, GO:0005623, GO:0005737, GO:0016491, GO:0005739, GO:0005783, GO:0043226, GO:0005575, GO:0003674, GO:0005622	cytoplasm, biological_process, organelle, oxidoreductase activity, cell, cellular_component, intracellular, endoplasmic reticulum, mitochondrion, molecular_function	33.9834	91.37	3.83	3.83	48.4534	0.0191693	0.0722672	0.0771953	0.291022	1	1	7	Infinity	99.6753	Doubtful
C01R01	P52480	Pyruvate kinase PKM (KPYM_MOUSE)	ENSMUSG00000032294	Pkm	9	GO:0008150, GO:0006091, GO:0009056, GO:0043167, GO:0043226, GO:0005576, GO:0005575, GO:0003674, GO:0005622, GO:0044281, GO:0005623, GO:0005634, GO:0005975, GO:0008219, GO:0005737, GO:0005739, GO:0051186, GO:0005929, GO:0005829, GO:0034641, GO:0016301	carbohydrate metabolic process, catabolic process, cofactor metabolic process, cell death, biological_process, cytosol, organelle, extracellular region, nucleus, cellular_component, cell, molecular_function, mitochondrion, cytoplasm, cilium, ion binding, cellular nitrogen compound metabolic process, generation of precursor metabolites and energy, kinase activity, small molecule metabolic process,…	57.808	89.45	64.22	61.21	152.145	0.0601923	2.28193	0.242396	9.18937	39	39	238	Infinity	99.6753	Confident
C01R01	Q9CZ13	Cytochrome b-c1 complex subunit 1, mitochondrial (QCR1_MOUSE)	ENSMUSG00000107235	Uqcrc1	CHR_MG117_PATCH	GO:0008150, GO:0006091, GO:0043167, GO:0043234, GO:0008233, GO:0043226, GO:0005575, GO:0003674, GO:0005622, GO:0044281, GO:0005623, GO:0005737, GO:0005739, GO:0005829, GO:0051604, GO:0034641, GO:0019899	enzyme binding, protein maturation, biological_process, cytosol, organelle, peptidase activity, protein complex, cellular_component, cell, molecular_function, mitochondrion, cytoplasm, ion binding, cellular nitrogen compound metabolic process, generation of precursor metabolites and energy, small molecule metabolic process, intracellular	52.8185	65.83	38.96	38.96	218.007	0.0862486	1.26754	0.347325	5.10442	17	17	113	Infinity	99.6753	Confident
C01R01	Q4KMM3	Oxidation resistance protein 1 (OXR1_MOUSE)	ENSMUSG00000022307	Oxr1	15	GO:0008150, GO:0006464, GO:0005730, GO:0043226, GO:0005575, GO:0005622, GO:0006950, GO:0003674, GO:0005654, GO:0005634, GO:0005623, GO:0008219, GO:0016491, GO:0005737, GO:0005739	nucleoplasm, cell death, biological_process, organelle, nucleus, cellular_component, cell, molecular_function, mitochondrion, cytoplasm, response to stress, nucleolus, cellular protein modification process, oxidoreductase activity, intracellular	95.8525	75.4	7.16	7.16	19.1237	0.00756579	0.099606	0.0304676	0.401115	8	8	18	Infinity	99.6753	Confident
C01R01	P09671	Superoxide dismutase [Mn], mitochondrial (SODM_MOUSE)	ENSMUSG00000006818	Sod2	17	GO:0008283, GO:0006461, GO:0040011, GO:0022607, GO:0043167, GO:0048856, GO:0009058, GO:0043226, GO:0005575, GO:0003013, GO:0003674, GO:0005623, GO:0008219, GO:0016491, GO:0043473, GO:0051186, GO:0034641, GO:0050877, GO:0008150, GO:0006091, GO:0065003, GO:0006790, GO:0007165, GO:0007568, GO:0006950, GO:0005622, GO:0002376, GO:0007005, GO:0048870, GO:0003677, GO:0005737, GO:0042592, GO:0005739, GO:…	cell differentiation, cellular component assembly, locomotion, cellular_component, cell, molecular_function, cytoplasm, ion binding, cellular nitrogen compound metabolic process, biosynthetic process, sulfur compound metabolic process, immune system process, homeostatic process, enzyme binding, mitochondrion organization, nervous system process, cofactor metabolic process, cell proliferation, cel…	24.5875	71.17	22.97	22.97	125.703	0.0497312	0.492496	0.200268	1.98329	6	6	24	Infinity	99.6753	Confident
C01R01	Q99L13	3-hydroxyisobutyrate dehydrogenase, mitochondrial (3HIDH_MOUSE)	ENSMUSG00000029776	Hibadh	6	GO:0044281, GO:0008150, GO:0005623, GO:0016491, GO:0005737, GO:0009056, GO:0005739, GO:0006520, GO:0043226, GO:0005575, GO:0003674, GO:0005622	cytoplasm, catabolic process, cellular amino acid metabolic process, biological_process, small molecule metabolic process, organelle, oxidoreductase activity, cell, cellular_component, intracellular, mitochondrion, molecular_function	35.4166	77.31	18.81	18.81	50.4229	0.0199485	0.433013	0.0803331	1.74375	7	7	22	Infinity	99.6753	Confident
C01R01	Q8JZN5	Acyl-CoA dehydrogenase family member 9, mitochondrial (ACAD9_MOUSE)	ENSMUSG00000027710	Acad9	3	GO:0008150, GO:0065003, GO:0006461, GO:0022607, GO:0043167, GO:0043226, GO:0005575, GO:0003674, GO:0007005, GO:0005622, GO:0044281, GO:0005623, GO:0005634, GO:0016491, GO:0005737, GO:0005739, GO:0006629	mitochondrion organization, biological_process, cellular component assembly, organelle, nucleus, macromolecular complex assembly, cellular_component, cell, molecular_function, mitochondrion, cytoplasm, ion binding, small molecule metabolic process, lipid metabolic process, protein complex assembly, oxidoreductase activity, intracellular	68.6787	74.08	4.48	2.4	2.12765	0.000841751	0.0670113	0.00338975	0.269856	2	2	4	Infinity	99.6753	Doubtful
C01R01	Q9DB20	ATP synthase subunit O, mitochondrial (ATPO_MOUSE)	ENSMUSG00000022956	Atp5o	16	GO:0016887, GO:0008150, GO:0055085, GO:0022857, GO:0008289, GO:0009058, GO:0043234, GO:0043226, GO:0005576, GO:0006810, GO:0005575, GO:0005886, GO:0005622, GO:0003674, GO:0044281, GO:0005623, GO:0005737, GO:0005739, GO:0034641	biological_process, transmembrane transporter activity, plasma membrane, organelle, extracellular region, transport, protein complex, cellular_component, cell, atpase activity, lipid binding, molecular_function, mitochondrion, cytoplasm, transmembrane transport, cellular nitrogen compound metabolic process, biosynthetic process, small molecule metabolic process, intracellular	23.3487	100	46.95	46.95	144.72	0.0572546	0.778279	0.230566	3.13415	9	9	50	Infinity	99.6753	Confident
C01R01	O09165	Calsequestrin-1 (CASQ1_MOUSE)	ENSMUSG00000007122	Casq1	1	GO:0008150, GO:0055085, GO:0007010, GO:0065003, GO:0007165, GO:0006461, GO:0022607, GO:0048856, GO:0043167, GO:0048646, GO:0005794, GO:0005783, GO:0043226, GO:0006810, GO:0005575, GO:0006950, GO:0005886, GO:0005622, GO:0003674, GO:0005623, GO:0005737, GO:0042592, GO:0005739, GO:0030154	cell differentiation, cytoskeleton organization, biological_process, signal transduction, plasma membrane, cellular component assembly, organelle, anatomical structure formation involved in morphogenesis, macromolecular complex assembly, transport, cellular_component, cell, molecular_function, mitochondrion, cytoplasm, transmembrane transport, ion binding, response to stress, protein complex asse…	46.3492	48.15	4.69	4.69	12.9623	0.00512821	0.0722672	0.0206514	0.291022	2	2	3	Infinity	99.6753	Doubtful
C01R01	Q9DB77	Cytochrome b-c1 complex subunit 2, mitochondrial (QCR2_MOUSE)	ENSMUSG00000030884	Uqcrc2	7	GO:0008150, GO:0043167, GO:0008233, GO:0043234, GO:0043226, GO:0005575, GO:0006810, GO:0007005, GO:0003674, GO:0005622, GO:0005654, GO:0005623, GO:0005634, GO:0006605, GO:0005737, GO:0005739, GO:0051604	mitochondrion organization, nucleoplasm, protein maturation, biological_process, organelle, nucleus, peptidase activity, transport, protein complex, cellular_component, cell, molecular_function, mitochondrion, cytoplasm, ion binding, protein targeting, intracellular	48.205	70.86	41.5	41.5	203.355	0.0804522	1.11879	0.323983	4.50537	16	16	103	Infinity	99.6753	Confident
C01R01	Q9D0S9	Histidine triad nucleotide-binding protein 2, mitochondrial (HINT2_MOUSE)	ENSMUSG00000028470	Hint2	4	GO:0008150, GO:0009056, GO:0006464, GO:0009058, GO:0005730, GO:0043226, GO:0005575, GO:0003674, GO:0005622, GO:0005634, GO:0005623, GO:0008219, GO:0005737, GO:0006629, GO:0005739	catabolic process, cell death, biological_process, organelle, nucleus, cellular_component, cell, molecular_function, mitochondrion, cytoplasm, biosynthetic process, lipid metabolic process, nucleolus, cellular protein modification process, intracellular	17.3094	100	17.18	17.18	85.2889	0.0337423	0.274275	0.135881	1.10451	2	2	9	Infinity	99.6753	Confident
C01R01	Q9QXX4	Calcium-binding mitochondrial carrier protein Aralar2 (CMC2_MOUSE)	ENSMUSG00000015112	Slc25a13	6	GO:0008150, GO:0006091, GO:0055085, GO:0022857, GO:0043167, GO:0009058, GO:0043226, GO:0006810, GO:0005575, GO:0003674, GO:0005622, GO:0044281, GO:0005623, GO:0005737, GO:0005739, GO:0034641	biological_process, transmembrane transporter activity, organelle, transport, cellular_component, cell, molecular_function, mitochondrion, cytoplasm, transmembrane transport, ion binding, cellular nitrogen compound metabolic process, generation of precursor metabolites and energy, biosynthetic process, small molecule metabolic process, intracellular	74.4198	77.22	7.1	5.33	13.541	0.00535714	0.136464	0.0215733	0.549542	6	2	22	21.8965	86.9565	Doubtful
C01R01	Q60930	Voltage-dependent anion-selective channel protein 2 (VDAC2_MOUSE)	ENSMUSG00000021771	Vdac2	14	GO:0008150, GO:0055085, GO:0022857, GO:0065003, GO:0006461, GO:0007165, GO:0022607, GO:0043234, GO:0043226, GO:0005575, GO:0006810, GO:0005622, GO:0000003, GO:0003674, GO:0005623, GO:0008219, GO:0005737, GO:0005739, GO:0031410	cell death, biological_process, transmembrane transporter activity, signal transduction, cellular component assembly, organelle, macromolecular complex assembly, transport, protein complex, cellular_component, cell, molecular_function, mitochondrion, cytoplasm, transmembrane transport, cytoplasmic vesicle, protein complex assembly, intracellular, reproduction	31.7126	86.1	21.69	21.69	155.905	0.0616798	0.610262	0.248386	2.45754	8	8	46	Infinity	99.6753	Confident
C01R01	Q60931	Voltage-dependent anion-selective channel protein 3 (VDAC3_MOUSE)	ENSMUSG00000008892	Vdac3	8	GO:0008150, GO:0055085, GO:0022857, GO:0022607, GO:0007267, GO:0043234, GO:0043226, GO:0005575, GO:0006810, GO:0005622, GO:0003674, GO:0006950, GO:0005623, GO:0005737, GO:0005739, GO:0050877	nervous system process, biological_process, transmembrane transporter activity, cell-cell signaling, cellular component assembly, organelle, transport, protein complex, cellular_component, cell, molecular_function, mitochondrion, cytoplasm, transmembrane transport, response to stress, intracellular	30.7334	85.51	20.85	20.85	164.705	0.0651614	0.539927	0.262406	2.17429	8	7	50	Infinity	99.6753	Confident
C01R01	Q60932	Voltage-dependent anion-selective channel protein 1 (VDAC1_MOUSE)	ENSMUSG00000020402	Vdac1	11	GO:0008150, GO:0055085, GO:0022857, GO:0009056, GO:0007267, GO:0043234, GO:0043226, GO:0005575, GO:0006810, GO:0005622, GO:0003674, GO:0006950, GO:0005886, GO:0007005, GO:0005623, GO:0008219, GO:0005737, GO:0006914, GO:0005739, GO:0031410, GO:0050877, GO:0019899	enzyme binding, mitochondrion organization, catabolic process, nervous system process, autophagy, cell death, biological_process, transmembrane transporter activity, cell-cell signaling, plasma membrane, organelle, transport, protein complex, cellular_component, cell, molecular_function, mitochondrion, cytoplasm, transmembrane transport, cytoplasmic vesicle, response to stress, intracellular	32.3314	91.89	62.16	53.04	159.988	0.0632949	1.5483	0.25489	6.23502	15	14	138	Infinity	99.6753	Confident
C01R01	Q64433	10 kDa heat shock protein, mitochondrial (CH10_MOUSE)	ENSMUSG00000073676	Hspe1	1	GO:0008150, GO:0005623, GO:0005737, GO:0005739, GO:0043167, GO:0051082, GO:0006457, GO:0043226, GO:0005575, GO:0003674, GO:0006950, GO:0005622	cytoplasm, ion binding, biological_process, response to stress, organelle, protein folding, cell, cellular_component, intracellular, unfolded protein binding, mitochondrion, molecular_function	10.9559	100	31.37	31.37	276.72	0.109477	0.539927	0.440867	2.17429	3	3	22	Infinity	99.6753	Confident
C01R01	Q9D0M3	Cytochrome c1, heme protein, mitochondrial (CY1_MOUSE)	ENSMUSG00000022551	Cyc1	15	GO:0008150, GO:0006091, GO:0055085, GO:0043167, GO:0043234, GO:0009058, GO:0043226, GO:0005575, GO:0006810, GO:0005622, GO:0003674, GO:0044281, GO:0005623, GO:0005737, GO:0016491, GO:0005739, GO:0034641	biological_process, organelle, transport, protein complex, cellular_component, cell, molecular_function, mitochondrion, cytoplasm, transmembrane transport, ion binding, cellular nitrogen compound metabolic process, generation of precursor metabolites and energy, biosynthetic process, small molecule metabolic process, oxidoreductase activity, intracellular	35.3049	75.08	28.62	28.62	120.34	0.0476093	0.501311	0.191724	2.01879	6	6	32	Infinity	99.6753	Confident
C01R01	Q9D0K2	Succinyl-CoA:3-ketoacid coenzyme A transferase 1, mitochondrial (SCOT1_MOUSE)	ENSMUSG00000022186	Oxct1	15	GO:0008150, GO:0009056, GO:0007267, GO:0048856, GO:0043226, GO:0005575, GO:0006810, GO:0006950, GO:0005622, GO:0003674, GO:0005654, GO:0044281, GO:0005634, GO:0005623, GO:0005737, GO:0042592, GO:0005739	catabolic process, nucleoplasm, biological_process, cell-cell signaling, organelle, nucleus, transport, cellular_component, cell, molecular_function, mitochondrion, cytoplasm, response to stress, small molecule metabolic process, homeostatic process, anatomical structure development, intracellular	55.953	75	33.08	29.23	100.506	0.0397624	0.449741	0.160124	1.81111	16	16	81	Infinity	99.6753	Confident
C01R01	O09111	NADH dehydrogenase [ubiquinone] 1 beta subcomplex subunit 11, mitochondrial (NDUBB_MOUSE)	ENSMUSG00000031059	Ndufb11	X	GO:0008150, GO:0065003, GO:0006461, GO:0022607, GO:0043234, GO:0043226, GO:0005575, GO:0005622, GO:0003674, GO:0007005, GO:0005623, GO:0005737, GO:0005739	mitochondrion organization, biological_process, cellular component assembly, organelle, macromolecular complex assembly, protein complex, cellular_component, cell, molecular_function, mitochondrion, cytoplasm, protein complex assembly, intracellular	17.4326	83.44	17.88	17.88	192.503	0.0761589	0.258925	0.306694	1.0427	2	2	17	Infinity	99.6753	Confident
C01R01	Q9D1G1	Ras-related protein Rab-1B (RAB1B_MOUSE)	ENSMUSG00000024870	Rab1b	19	GO:0008150, GO:0009056, GO:0022607, GO:0043167, GO:0005794, GO:0005783, GO:0043226, GO:0044403, GO:0006810, GO:0005575, GO:0005622, GO:0003674, GO:0005623, GO:0016192, GO:0005737, GO:0006914, GO:0003924, GO:0005739	catabolic process, autophagy, biological_process, cellular component assembly, organelle, gtpase activity, symbiont process, transport, cellular_component, cell, molecular_function, mitochondrion, cytoplasm, ion binding, golgi apparatus, intracellular, endoplasmic reticulum, vesicle-mediated transport	22.1732	100	53.23	53.23	184.323	0.0729225	1.22754	0.29366	4.94334	11	3	57	Infinity	99.6753	Confident
C01R01	Q7TMF3	NADH dehydrogenase [ubiquinone] 1 alpha subcomplex subunit 12 (NDUAC_MOUSE)	ENSMUSG00000020022	Ndufa12	10	GO:0008150, GO:0006091, GO:0043234, GO:0043226, GO:0005575, GO:0003674, GO:0005622, GO:0006950, GO:0044281, GO:0005623, GO:0005737, GO:0016491, GO:0005739, GO:0005829, GO:0034641	biological_process, cytosol, organelle, protein complex, cellular_component, cell, molecular_function, mitochondrion, cytoplasm, cellular nitrogen compound metabolic process, generation of precursor metabolites and energy, response to stress, small molecule metabolic process, oxidoreductase activity, intracellular	17.0756	100	14.48	14.48	156.889	0.062069	0.258925	0.249953	1.0427	2	2	14	Infinity	99.6753	Confident
C01R01	P18242	Cathepsin D (CATD_MOUSE)	ENSMUSG00000007891	Ctsd	7	GO:0008150, GO:0009056, GO:0022607, GO:0008233, GO:0005576, GO:0043226, GO:0005575, GO:0005773, GO:0005622, GO:0003674, GO:0005764, GO:0005623, GO:0005615, GO:0005737, GO:0006914, GO:0005739, GO:0031410	catabolic process, autophagy, vacuole, biological_process, cellular component assembly, organelle, extracellular region, peptidase activity, cellular_component, cell, molecular_function, mitochondrion, cytoplasm, cytoplasmic vesicle, extracellular space, intracellular, lysosome	44.925	68.05	13.17	11.22	92.3034	0.0365174	0.343399	0.147056	1.38288	10	10	33	Infinity	99.6753	Confident
C01R01	Q9D172	ES1 protein homolog, mitochondrial (ES1_MOUSE)	ENSMUSG00000053329	D10Jhu81e	10	GO:0008150, GO:0005623, GO:0005737, GO:0005739, GO:0043226, GO:0005575, GO:0005622, GO:0003674	cytoplasm, biological_process, organelle, cell, cellular_component, intracellular, mitochondrion, molecular_function	28.0728	70.68	16.92	16.92	79.1871	0.0313283	0.258925	0.12616	1.0427	4	4	17	Infinity	99.6753	Confident
C01R01	P85094	Isochorismatase domain-containing protein 2A (ISC2A_MOUSE)	ENSMUSG00000086784	Isoc2a	7	GO:0005634, GO:0008150, GO:0005623, GO:0005737, GO:0005739, GO:0043226, GO:0005575, GO:0003674, GO:0005622	cytoplasm, biological_process, organelle, nucleus, cell, cellular_component, intracellular, mitochondrion, molecular_function	22.403	70.87	8.74	8.74	116.886	0.0462428	0.128838	0.186221	0.518833	4	4	11	Infinity	99.6753	Doubtful
C01R01	Q9Z0X1	Apoptosis-inducing factor 1, mitochondrial (AIFM1_MOUSE)	ENSMUSG00000036932	Aifm1	X	GO:0006461, GO:0009056, GO:0022607, GO:0048856, GO:0043167, GO:0043226, GO:0005575, GO:0003674, GO:0005623, GO:0008219, GO:0016491, GO:0005829, GO:0034641, GO:0008150, GO:0006091, GO:0065003, GO:0007165, GO:0006259, GO:0007005, GO:0005622, GO:0006950, GO:0005634, GO:0003677, GO:0005737, GO:0005739, GO:0030154, GO:0034655	cell differentiation, cellular component assembly, cellular_component, cell, molecular_function, cytoplasm, ion binding, cellular nitrogen compound metabolic process, mitochondrion organization, catabolic process, nucleobase-containing compound catabolic process, cell death, dna metabolic process, cytosol, biological_process, signal transduction, organelle, nucleus, macromolecular complex assembl…	66.7238	82.03	7.35	7.35	36.4261	0.014411	0.0951502	0.0580335	0.383172	4	4	14	Infinity	99.6753	Confident
C01R01	Q91ZZ3	Beta-synuclein (SYUB_MOUSE)	ENSMUSG00000034891	Sncb	13	GO:0005623, GO:0008150, GO:0008219, GO:0005737, GO:0005739, GO:0007267, GO:0043167, GO:0043226, GO:0005575, GO:0003674, GO:0005622	cytoplasm, ion binding, cell death, biological_process, cell-cell signaling, organelle, cell, cellular_component, intracellular, mitochondrion, molecular_function	14.0429	44.36	52.63	52.63	418.549	0.165588	2.83119	0.666826	11.4012	8	4	49	Infinity	99.6753	Confident
C01R01	P19783	Cytochrome c oxidase subunit 4 isoform 1, mitochondrial (COX41_MOUSE)	ENSMUSG00000031818	Cox4i1	8	GO:0008150, GO:0006091, GO:0055085, GO:0022857, GO:0043234, GO:0043226, GO:0006810, GO:0005575, GO:0005622, GO:0003674, GO:0044281, GO:0005623, GO:0005634, GO:0016491, GO:0005737, GO:0005739, GO:0034641	biological_process, transmembrane transporter activity, organelle, nucleus, transport, protein complex, cellular_component, cell, molecular_function, mitochondrion, cytoplasm, transmembrane transport, cellular nitrogen compound metabolic process, generation of precursor metabolites and energy, small molecule metabolic process, oxidoreductase activity, intracellular	19.5178	100	42.6	42.6	213.967	0.0846506	1.0893	0.34089	4.38662	9	9	40	Infinity	99.6753	Confident
C01R01	P51881	ADP/ATP translocase 2 (ADT2_MOUSE)	ENSMUSG00000016319	Slc25a5	X	GO:0008283, GO:0008150, GO:0061024, GO:0055085, GO:0022857, GO:0007165, GO:0007059, GO:0043234, GO:0043226, GO:0005576, GO:0005575, GO:0006810, GO:0007005, GO:0005622, GO:0003674, GO:0005623, GO:0005856, GO:0008219, GO:0005737, GO:0005739, GO:0019899	enzyme binding, mitochondrion organization, cell proliferation, cell death, biological_process, transmembrane transporter activity, signal transduction, cytoskeleton, organelle, extracellular region, transport, protein complex, cellular_component, cell, molecular_function, mitochondrion, cytoplasm, transmembrane transport, chromosome segregation, membrane organization, intracellular	32.9102	81.21	33.56	28.19	145.414	0.0575292	1.53958	0.231671	6.19992	20	8	109	Infinity	99.6753	Confident
C01R01	P50516	V-type proton ATPase catalytic subunit A (VATA_MOUSE)	ENSMUSG00000052459	Atp6v1a	16	GO:0016887, GO:0008150, GO:0055085, GO:0022857, GO:0043167, GO:0043234, GO:0043226, GO:0005575, GO:0005773, GO:0006810, GO:0003674, GO:0005622, GO:0005886, GO:0005764, GO:0044281, GO:0005623, GO:0005737, GO:0042592, GO:0005739, GO:0005829, GO:0034641	vacuole, biological_process, transmembrane transporter activity, plasma membrane, cytosol, organelle, transport, protein complex, cellular_component, cell, atpase activity, molecular_function, mitochondrion, cytoplasm, transmembrane transport, ion binding, cellular nitrogen compound metabolic process, small molecule metabolic process, homeostatic process, intracellular, lysosome	68.2826	74.39	35.01	35.01	67.0598	0.0265305	0.809572	0.106839	3.26016	21	21	93	Infinity	99.6753	Confident
C01R01	P50518	V-type proton ATPase subunit E 1 (VATE1_MOUSE)	ENSMUSG00000019210	Atp6v1e1	6	GO:0016887, GO:0008150, GO:0055085, GO:0022857, GO:0043234, GO:0043226, GO:0006810, GO:0005575, GO:0005622, GO:0005886, GO:0003674, GO:0005623, GO:0005768, GO:0005737, GO:0005739, GO:0031410, GO:0005829, GO:0019899	enzyme binding, biological_process, transmembrane transporter activity, plasma membrane, cytosol, organelle, transport, protein complex, cellular_component, cell, atpase activity, molecular_function, mitochondrion, cytoplasm, transmembrane transport, endosome, cytoplasmic vesicle, intracellular	26.1408	88.05	32.3	28.76	128.02	0.0506479	0.603719	0.20396	2.43119	9	9	43	Infinity	99.6753	Confident
C01R01	P54071	Isocitrate dehydrogenase [NADP], mitochondrial (IDHP_MOUSE)	ENSMUSG00000030541	Idh2	7	GO:0008283, GO:0008150, GO:0006091, GO:0040011, GO:0048856, GO:0043167, GO:0009058, GO:0043226, GO:0006810, GO:0005575, GO:0003674, GO:0005622, GO:0044281, GO:0048870, GO:0005975, GO:0005623, GO:0005777, GO:0005737, GO:0016491, GO:0051186, GO:0005739, GO:0030154, GO:0005829, GO:0034641	carbohydrate metabolic process, cell differentiation, cofactor metabolic process, cell proliferation, biological_process, cytosol, organelle, locomotion, peroxisome, transport, cellular_component, cell, molecular_function, mitochondrion, cell motility, cytoplasm, ion binding, cellular nitrogen compound metabolic process, generation of precursor metabolites and energy, biosynthetic process, small …	50.8739	84.96	8.41	8.41	54.8536	0.0217014	0.126482	0.0873919	0.509344	5	5	21	Infinity	99.6753	Confident
C01R01	P14824	Annexin A6 (ANXA6_MOUSE)	ENSMUSG00000018340	Anxa6	11	GO:0008150, GO:0055085, GO:0022857, GO:0065003, GO:0006461, GO:0007165, GO:0022607, GO:0043167, GO:0008289, GO:0043226, GO:0006810, GO:0005575, GO:0005773, GO:0005622, GO:0003674, GO:0005764, GO:0005623, GO:0008219, GO:0005768, GO:0005737, GO:0042592, GO:0005739, GO:0005829, GO:0031410	vacuole, cell death, biological_process, transmembrane transporter activity, signal transduction, cytosol, cellular component assembly, organelle, macromolecular complex assembly, transport, cellular_component, cell, lipid binding, molecular_function, mitochondrion, cytoplasm, transmembrane transport, ion binding, endosome, cytoplasmic vesicle, protein complex assembly, homeostatic process, intra…	75.8374	91.68	22.44	21.1	33.3236	0.0131836	0.389495	0.0530906	1.56851	21	21	69	Infinity	99.6753	Confident
C01R01	P31324	cAMP-dependent protein kinase type II-beta regulatory subunit (KAP3_MOUSE)	ENSMUSG00000002997	Prkar2b	12	GO:0008150, GO:0006464, GO:0043167, GO:0043226, GO:0005575, GO:0003674, GO:0005886, GO:0005622, GO:0044281, GO:0005623, GO:0005856, GO:0005815, GO:0005737, GO:0006629, GO:0005739, GO:0005929, GO:0030234, GO:0050877, GO:0019899	enzyme binding, nervous system process, biological_process, plasma membrane, cytoskeleton, organelle, cellular_component, cell, molecular_function, mitochondrion, cytoplasm, cilium, ion binding, microtubule organizing center, small molecule metabolic process, enzyme regulator activity, lipid metabolic process, cellular protein modification process, intracellular	46.138	93.51	19.23	19.23	23.798	0.00941506	0.264855	0.0379147	1.06658	7	6	16	Infinity	99.6753	Confident
C01R01	P05063	Fructose-bisphosphate aldolase C (ALDOC_MOUSE)	ENSMUSG00000017390	Aldoc	11	GO:0008150, GO:0006091, GO:0009056, GO:0048856, GO:0016829, GO:0043226, GO:0005575, GO:0005622, GO:0003674, GO:0044281, GO:0005623, GO:0005975, GO:0005737, GO:0005739, GO:0051186, GO:0030154, GO:0034641, GO:0008092	carbohydrate metabolic process, catabolic process, cell differentiation, cofactor metabolic process, biological_process, organelle, cellular_component, cell, molecular_function, mitochondrion, cytoplasm, cellular nitrogen compound metabolic process, generation of precursor metabolites and energy, small molecule metabolic process, lyase activity, cytoskeletal protein binding, anatomical structure …	39.3702	76.58	69.97	67.77	180.071	0.0712402	2.16228	0.286886	8.70754	22	18	144	Infinity	99.6753	Confident
C01R01	Q9D051	Pyruvate dehydrogenase E1 component subunit beta, mitochondrial (ODPB_MOUSE)	ENSMUSG00000021748	Pdhb	14	GO:0008150, GO:0006091, GO:0006790, GO:0009058, GO:0043226, GO:0005575, GO:0003674, GO:0005622, GO:0005654, GO:0044281, GO:0005634, GO:0005623, GO:0005975, GO:0005737, GO:0016491, GO:0051186, GO:0005739, GO:0034641	carbohydrate metabolic process, nucleoplasm, cofactor metabolic process, biological_process, organelle, nucleus, cellular_component, cell, molecular_function, mitochondrion, cytoplasm, cellular nitrogen compound metabolic process, generation of precursor metabolites and energy, biosynthetic process, small molecule metabolic process, sulfur compound metabolic process, oxidoreductase activity, intr…	38.912	64.07	23.12	23.12	157.674	0.0623794	0.483982	0.251203	1.949	8	8	55	Infinity	99.6753	Confident
C01R01	P62259	14-3-3 protein epsilon (1433E_MOUSE)	ENSMUSG00000020849	Ywhae	11	GO:0040011, GO:0043167, GO:0048856, GO:0006464, GO:0043226, GO:0005575, GO:0003674, GO:0005623, GO:0006913, GO:0016491, GO:0031410, GO:0005829, GO:0008150, GO:0055085, GO:0007165, GO:0043234, GO:0006810, GO:0006950, GO:0005886, GO:0005622, GO:0048870, GO:0005634, GO:0006605, GO:0005856, GO:0005737, GO:0042592, GO:0005739, GO:0030154, GO:0019899	cell differentiation, locomotion, cellular_component, cell, protein complex, molecular_function, cytoplasm, ion binding, protein targeting, homeostatic process, enzyme binding, cytosol, biological_process, signal transduction, plasma membrane, cytoskeleton, organelle, nucleus, transport, mitochondrion, cell motility, transmembrane transport, cytoplasmic vesicle, response to stress, nucleocytoplas…	29.1554	100	52.16	52.16	169.964	0.0672419	1.47708	0.270784	5.94822	15	13	86	Infinity	99.6753	Confident
C01R01	Q9ESW4	Acylglycerol kinase, mitochondrial (AGK_MOUSE)	ENSMUSG00000029916	Agk	6	GO:0061024, GO:0008150, GO:0055085, GO:0043167, GO:0009058, GO:0043234, GO:0043226, GO:0005575, GO:0006810, GO:0005622, GO:0007005, GO:0003674, GO:0005623, GO:0006605, GO:0005737, GO:0005739, GO:0006629, GO:0034641, GO:0016301	mitochondrion organization, biological_process, organelle, transport, protein complex, cellular_component, cell, molecular_function, mitochondrion, cytoplasm, transmembrane transport, ion binding, cellular nitrogen compound metabolic process, biosynthetic process, kinase activity, membrane organization, lipid metabolic process, protein targeting, intracellular	46.9463	71.97	4.99	4.99	16.5422	0.0065445	0.0944998	0.0263548	0.380553	3	3	7	Infinity	99.6753	Confident
C01R01	Q3UUI3	Acyl-coenzyme A thioesterase THEM4 (THEM4_MOUSE)	ENSMUSG00000028145	Them4	3	GO:0061024, GO:0008150, GO:0007165, GO:0043226, GO:0044403, GO:0006810, GO:0005575, GO:0003674, GO:0007005, GO:0005886, GO:0005622, GO:0044281, GO:0005623, GO:0008219, GO:0005737, GO:0006629, GO:0005739, GO:0005829	mitochondrion organization, cell death, biological_process, signal transduction, plasma membrane, cytosol, organelle, symbiont process, transport, cellular_component, cell, molecular_function, mitochondrion, cytoplasm, membrane organization, small molecule metabolic process, lipid metabolic process, intracellular	26.0146	77.83	19.13	19.13	195.34	0.0772812	0.333521	0.311213	1.3431	7	7	28	Infinity	99.6753	Confident
C01R01	Q4VAE3	Transmembrane protein 65 (TMM65_MOUSE)	ENSMUSG00000062373	Tmem65	15	GO:0005623, GO:0008150, GO:0005737, GO:0005739, GO:0048856, GO:0043226, GO:0005575, GO:0003013, GO:0003674, GO:0005622, GO:0005886	cytoplasm, circulatory system process, biological_process, plasma membrane, organelle, cell, anatomical structure development, cellular_component, intracellular, mitochondrion, molecular_function	24.9021	59.83	4.7	4.7	76.1341	0.0301205	0.122018	0.121296	0.491371	4	4	8	Infinity	99.6753	Doubtful
C01R01	Q91YT0	NADH dehydrogenase [ubiquinone] flavoprotein 1, mitochondrial (NDUV1_MOUSE)	ENSMUSG00000037916	Ndufv1	19	GO:0008150, GO:0006091, GO:0043167, GO:0043234, GO:0043226, GO:0005575, GO:0003674, GO:0005622, GO:0044281, GO:0005623, GO:0005737, GO:0016491, GO:0005739, GO:0005829, GO:0034641	biological_process, cytosol, organelle, protein complex, cellular_component, cell, molecular_function, mitochondrion, cytoplasm, ion binding, cellular nitrogen compound metabolic process, generation of precursor metabolites and energy, small molecule metabolic process, oxidoreductase activity, intracellular	50.8017	80.82	23.92	23.92	38.8004	0.0153503	0.467799	0.0618161	1.88384	11	11	40	Infinity	99.6753	Confident
C01R01	P56382	ATP synthase subunit epsilon, mitochondrial (ATP5E_MOUSE)	ENSMUSG00000016252	Atp5e	2	GO:0016887, GO:0008150, GO:0055085, GO:0022857, GO:0043234, GO:0009058, GO:0043226, GO:0005575, GO:0006810, GO:0003674, GO:0005622, GO:0044281, GO:0005623, GO:0005737, GO:0005739, GO:0034641	biological_process, transmembrane transporter activity, organelle, transport, protein complex, cellular_component, cell, atpase activity, molecular_function, mitochondrion, cytoplasm, transmembrane transport, cellular nitrogen compound metabolic process, biosynthetic process, small molecule metabolic process, intracellular	5.83415	100	30.77	30.77	267.348	0.105769	0.467799	0.425935	1.88384	2	2	11	42.477	90.0118	Confident
C01R01	Q78IK4	MICOS complex subunit Mic27 (MIC27_MOUSE)	ENSMUSG00000025525	Apool	X	GO:0008150, GO:0061024, GO:0005623, GO:0005737, GO:0005739, GO:0043234, GO:0043226, GO:0005575, GO:0003674, GO:0007005, GO:0005622	cytoplasm, mitochondrion organization, biological_process, membrane organization, organelle, cell, protein complex, cellular_component, intracellular, mitochondrion, molecular_function	29.2422	90.57	4.15	4.15	28.6149	0.0113208	0.070069	0.0455889	0.282169	3	3	6	22.5545	87.3176	Doubtful
C01R01	P56391	Cytochrome c oxidase subunit 6B1 (CX6B1_MOUSE)	ENSMUSG00000036751	Cox6b1	7	GO:0005623, GO:0043226, GO:0005737, GO:0005575, GO:0005622, GO:0005739	cytoplasm, cell, cellular_component, intracellular, organelle, mitochondrion	10.0649	100	25.58	25.58	58.7826	0.0232558	0.359356	0.0936516	1.44714	3	3	9	Infinity	99.6753	Confident
C01R01	Q02053	Ubiquitin-like modifier-activating enzyme 1 (UBA1_MOUSE)	ENSMUSG00000001924	Uba1	X	GO:0008150, GO:0009056, GO:0043167, GO:0006464, GO:0005783, GO:0005694, GO:0043226, GO:0005575, GO:0005773, GO:0005622, GO:0006950, GO:0003674, GO:0005764, GO:0005654, GO:0005623, GO:0005634, GO:0005768, GO:0005737, GO:0005739, GO:0005829, GO:0031410, GO:0016874	catabolic process, nucleoplasm, vacuole, biological_process, cytosol, organelle, chromosome, nucleus, cellular_component, cell, molecular_function, mitochondrion, cytoplasm, ion binding, endosome, cytoplasmic vesicle, response to stress, ligase activity, cellular protein modification process, intracellular, lysosome, endoplasmic reticulum	117.734	73.44	19.47	17.2	55.343	0.021895	0.365893	0.0881717	1.47346	26	20	108	Infinity	99.6753	Confident
C01R01	Q8CAQ8	MICOS complex subunit Mic60 (MIC60_MOUSE)	ENSMUSG00000052337	Immt	6	GO:0005623, GO:0061024, GO:0008150, GO:0005737, GO:0042592, GO:0005739, GO:0043234, GO:0043226, GO:0005575, GO:0005622, GO:0007005, GO:0003674	cytoplasm, mitochondrion organization, biological_process, membrane organization, organelle, homeostatic process, cell, protein complex, cellular_component, intracellular, mitochondrion, molecular_function	83.8482	95.11	5.28	5.28	15.2127	0.00601852	0.0754221	0.0242367	0.303726	9	9	21	Infinity	99.6753	Confident
C01R01	P61028	Ras-related protein Rab-8B (RAB8B_MOUSE)	ENSMUSG00000036943	Rab8b	9	GO:0034330, GO:0043167, GO:0043226, GO:0005575, GO:0003674, GO:0005654, GO:0005623, GO:0007009, GO:0005768, GO:0016192, GO:0003924, GO:0031410, GO:0061024, GO:0008150, GO:0055085, GO:0007267, GO:0006810, GO:0005886, GO:0005622, GO:0002376, GO:0005777, GO:0005634, GO:0006605, GO:0005737, GO:0005739	nucleoplasm, cell-cell signaling, gtpase activity, cellular_component, cell, molecular_function, cytoplasm, plasma membrane organization, ion binding, endosome, membrane organization, protein targeting, immune system process, biological_process, plasma membrane, organelle, peroxisome, nucleus, transport, mitochondrion, transmembrane transport, cytoplasmic vesicle, cell junction organization, intr…	23.5881	100	27.05	27.05	61.2071	0.024215	0.403004	0.0975143	1.6229	7	3	29	Infinity	99.6753	Confident
C01R01	Q64133	Amine oxidase [flavin-containing] A (AOFA_MOUSE)	ENSMUSG00000025037	Maoa	X	GO:0005623, GO:0008150, GO:0016491, GO:0009056, GO:0005737, GO:0005739, GO:0043226, GO:0005575, GO:0003674, GO:0005622	cytoplasm, catabolic process, biological_process, organelle, oxidoreductase activity, cell, cellular_component, intracellular, mitochondrion, molecular_function	59.5637	66.92	7.41	4.37	14.6756	0.00580601	0.115884	0.0233809	0.466667	5	4	14	47.6627	90.106	Confident
C01R01	Q9ERS2	NADH dehydrogenase [ubiquinone] 1 alpha subcomplex subunit 13 (NDUAD_MOUSE)	ENSMUSG00000036199	Ndufa13	8	GO:0009056, GO:0006461, GO:0022607, GO:0043167, GO:0009058, GO:0043226, GO:0005575, GO:0003674, GO:0005654, GO:0005623, GO:0008219, GO:0016491, GO:0034641, GO:0061024, GO:0008150, GO:0055085, GO:0065003, GO:0007165, GO:0043234, GO:0006810, GO:0040007, GO:0005622, GO:0007005, GO:0005634, GO:0006605, GO:0005737, GO:0005739	nucleoplasm, cellular component assembly, cellular_component, cell, protein complex, molecular_function, cytoplasm, ion binding, cellular nitrogen compound metabolic process, biosynthetic process, membrane organization, protein targeting, mitochondrion organization, catabolic process, cell death, biological_process, signal transduction, organelle, nucleus, macromolecular complex assembly, transpo…	16.8486	100	14.58	14.58	52.6595	0.0208333	0.232847	0.0838963	0.937678	4	4	9	Infinity	99.6753	Confident
C01R01	P38647	Stress-70 protein, mitochondrial (GRP75_MOUSE)	ENSMUSG00000024359	Hspa9	18	GO:0022607, GO:0048856, GO:0043167, GO:0009058, GO:0005730, GO:0043226, GO:0005576, GO:0005575, GO:0003674, GO:0006913, GO:0005623, GO:0051186, GO:0008150, GO:0006790, GO:0051082, GO:0006457, GO:0006810, GO:0005622, GO:0002376, GO:0005634, GO:0005737, GO:0042592, GO:0005739, GO:0030154, GO:0019899	cell differentiation, cellular component assembly, extracellular region, cellular_component, cell, molecular_function, cytoplasm, ion binding, biosynthetic process, nucleolus, sulfur compound metabolic process, protein folding, immune system process, homeostatic process, unfolded protein binding, enzyme binding, cofactor metabolic process, biological_process, organelle, nucleus, transport, mitoch…	73.4156	93.08	27.25	27.25	73.3345	0.0290129	0.487352	0.116835	1.96258	22	21	109	Infinity	99.6753	Confident
C01R01	Q9ERH6	Modulator of apoptosis 1 (MOAP1_MOUSE)	ENSMUSG00000096458	Moap1	12	GO:0008150, GO:0061024, GO:0007165, GO:0043226, GO:0006810, GO:0005575, GO:0007005, GO:0003674, GO:0006950, GO:0005622, GO:0005634, GO:0005623, GO:0008219, GO:0005737, GO:0005739, GO:0005829, GO:0019899	enzyme binding, mitochondrion organization, cell death, biological_process, signal transduction, cytosol, organelle, nucleus, transport, cellular_component, cell, molecular_function, mitochondrion, cytoplasm, response to stress, membrane organization, intracellular	39.3789	91.19	4.26	4.26	15.7486	0.00623053	0.0525003	0.0250905	0.21142	2	2	3	Infinity	99.6753	Doubtful
C01R01	Q9QUI0	Transforming protein RhoA (RHOA_MOUSE)	ENSMUSG00000007815	Rhoa	9	GO:0007010, GO:0022607, GO:0043226, GO:0003013, GO:0044281, GO:0005623, GO:0008219, GO:0003924, GO:0005829, GO:0008150, GO:0006091, GO:0065003, GO:0000902, GO:0048646, GO:0021700, GO:0006810, GO:0002376, GO:0040007, GO:0005886, GO:0006412, GO:0005634, GO:0008283, GO:0040011, GO:0006461, GO:0034330, GO:0043167, GO:0006464, GO:0048856, GO:0007155, GO:0009058, GO:0005575, GO:0003674, GO:0000278, GO:…	cellular component assembly, anatomical structure formation involved in morphogenesis, mitotic cell cycle, molecular_function, cell morphogenesis, mitotic nuclear division, immune system process, signal transduction, cytoskeleton, organelle, cell division, macromolecular complex assembly, mitochondrion, circulatory system process, cell motility, generation of precursor metabolites and energy, res…	21.7681	84.46	27.46	27.46	72.0316	0.0284974	0.389495	0.11476	1.56851	6	0	22	50.1845	90.0943	Confident
C01R01	P56480	ATP synthase subunit beta, mitochondrial (ATPB_MOUSE)	ENSMUSG00000025393	Atp5b	10	GO:0016887, GO:0040011, GO:0043167, GO:0048856, GO:0007155, GO:0009058, GO:0005576, GO:0043226, GO:0005575, GO:0003674, GO:0044281, GO:0005623, GO:0034641, GO:0008150, GO:0055085, GO:0022857, GO:0048646, GO:0043234, GO:0006810, GO:0005622, GO:0005886, GO:0048870, GO:0005737, GO:0042592, GO:0006629, GO:0005739	transmembrane transporter activity, locomotion, anatomical structure formation involved in morphogenesis, extracellular region, cellular_component, cell, protein complex, molecular_function, cytoplasm, ion binding, cellular nitrogen compound metabolic process, biosynthetic process, cell adhesion, homeostatic process, biological_process, plasma membrane, organelle, transport, atpase activity, mito…	56.2655	76.94	73.16	73.16	154.559	0.0611471	4.17947	0.246241	16.8308	39	39	301	Infinity	99.6753	Confident
C01R01	P03930	ATP synthase protein 8 (ATP8_MOUSE)		Mtatp8		GO:0008150, GO:0055085, GO:0022857, GO:0043234, GO:0009058, GO:0043226, GO:0005575, GO:0006810, GO:0005622, GO:0003674, GO:0044281, GO:0005623, GO:0016491, GO:0005737, GO:0005739, GO:0034641	biological_process, transmembrane transporter activity, organelle, transport, protein complex, cellular_component, cell, molecular_function, mitochondrion, cytoplasm, transmembrane transport, cellular nitrogen compound metabolic process, biosynthetic process, small molecule metabolic process, oxidoreductase activity, intracellular	7.76119	61.19	14.93	14.93	226.357	0.0895522	0.389495	0.360629	1.56851	1	1	6	Infinity	99.6753	Doubtful
C01R01	Q8CAY6	Acetyl-CoA acetyltransferase, cytosolic (THIC_MOUSE)	ENSMUSG00000023832	Acat2	17	GO:0008150, GO:0016746, GO:0009056, GO:0005730, GO:0043226, GO:0006810, GO:0005575, GO:0003674, GO:0005622, GO:0044281, GO:0005623, GO:0005634, GO:0005737, GO:0006629, GO:0005739, GO:0005829	catabolic process, biological_process, cytosol, organelle, transferase activity, transferring acyl groups, nucleus, transport, cellular_component, cell, molecular_function, mitochondrion, cytoplasm, small molecule metabolic process, lipid metabolic process, nucleolus, intracellular	41.2712	57.43	6.55	6.55	7.61341	0.00301205	0.0680004	0.0121296	0.273839	2	2	2	Infinity	99.6753	Doubtful
C01R01	Q03265	ATP synthase subunit alpha, mitochondrial (ATPA_MOUSE)	ENSMUSG00000116276	Atp5a1	CHR_MG3700_PATCH	GO:0008283, GO:0016887, GO:0008150, GO:0055085, GO:0022857, GO:0040011, GO:0043167, GO:0009058, GO:0043234, GO:0005576, GO:0043226, GO:0006810, GO:0005575, GO:0003674, GO:0005622, GO:0005886, GO:0044281, GO:0048870, GO:0005623, GO:0005634, GO:0005737, GO:0006629, GO:0005739, GO:0034641	cell proliferation, biological_process, transmembrane transporter activity, plasma membrane, organelle, locomotion, extracellular region, nucleus, transport, protein complex, cellular_component, cell, atpase activity, molecular_function, mitochondrion, cell motility, cytoplasm, transmembrane transport, ion binding, cellular nitrogen compound metabolic process, biosynthetic process, small molecule…	59.7156	85.71	49.91	48.28	251.449	0.0994793	1.66975	0.400605	6.72412	34	34	318	Infinity	99.6753	Confident
C01R01	P06151	L-lactate dehydrogenase A chain (LDHA_MOUSE)	ENSMUSG00000063229	Ldha	7	GO:0008150, GO:0006091, GO:0009056, GO:0009058, GO:0043226, GO:0005575, GO:0005622, GO:0003674, GO:0044281, GO:0005975, GO:0005623, GO:0016491, GO:0005737, GO:0051186, GO:0005739, GO:0005929, GO:0005829, GO:0034641	carbohydrate metabolic process, catabolic process, cofactor metabolic process, biological_process, cytosol, organelle, cellular_component, cell, molecular_function, mitochondrion, cytoplasm, cilium, cellular nitrogen compound metabolic process, generation of precursor metabolites and energy, biosynthetic process, small molecule metabolic process, oxidoreductase activity, intracellular	36.4752	81.33	40.06	40.06	180.651	0.0714697	1.19839	0.28781	4.82595	15	13	103	Infinity	99.6753	Confident
C01R01	P18760	Cofilin-1 (COF1_MOUSE)	ENSMUSG00000056201	Cfl1	19	GO:0009790, GO:0007010, GO:0040011, GO:0006461, GO:0034330, GO:0022607, GO:0043167, GO:0006464, GO:0048856, GO:0008289, GO:0007155, GO:0005576, GO:0043226, GO:0005575, GO:0003674, GO:0000278, GO:0051301, GO:0005623, GO:0006913, GO:0005829, GO:0008150, GO:0055085, GO:0065003, GO:0007165, GO:0000902, GO:0007267, GO:0048646, GO:0044403, GO:0006810, GO:0005622, GO:0040007, GO:0005886, GO:0007049, GO:…	cell differentiation, cell-cell signaling, cellular component assembly, locomotion, anatomical structure formation involved in morphogenesis, embryo development, extracellular region, mitotic cell cycle, cellular_component, cell, molecular_function, cytoplasm, ion binding, cell adhesion, cell morphogenesis, extracellular space, cytoskeletal protein binding, enzyme binding, cytoskeleton organizati…	18.5477	100	55.42	55.42	317.677	0.12568	1.21222	0.506118	4.88162	10	9	86	Infinity	99.6753	Confident
C01R01	P16125	L-lactate dehydrogenase B chain (LDHB_MOUSE)	ENSMUSG00000030246	Ldhb	6	GO:0008150, GO:0009058, GO:0043226, GO:0005575, GO:0003674, GO:0005622, GO:0044281, GO:0005623, GO:0005975, GO:0005737, GO:0016491, GO:0051186, GO:0005739, GO:0005829, GO:0034641, GO:0019899	carbohydrate metabolic process, enzyme binding, cofactor metabolic process, biological_process, cytosol, organelle, cellular_component, cell, molecular_function, mitochondrion, cytoplasm, cellular nitrogen compound metabolic process, biosynthetic process, small molecule metabolic process, oxidoreductase activity, intracellular	36.549	84.73	42.81	42.81	165.436	0.0654503	1.6827	0.26357	6.77625	17	16	101	Infinity	99.6753	Confident
C01R01	Q8BW75	Amine oxidase [flavin-containing] B (AOFB_MOUSE)	ENSMUSG00000040147	Maob	X	GO:0008150, GO:0009056, GO:0043167, GO:0043226, GO:0005575, GO:0006810, GO:0005622, GO:0003674, GO:0005623, GO:0016491, GO:0005737, GO:0005739, GO:0034641	catabolic process, biological_process, organelle, transport, cellular_component, cell, molecular_function, mitochondrion, cytoplasm, ion binding, cellular nitrogen compound metabolic process, oxidoreductase activity, intracellular	58.5204	71.92	4.81	4.81	28.9025	0.0114345	0.0784174	0.046047	0.315788	6	5	11	Infinity	99.6753	Confident
C01R01	P62897	Cytochrome c, somatic (CYC_MOUSE)	ENSMUSG00000063694	Cycs	6	GO:0008150, GO:0006091, GO:0043167, GO:0043226, GO:0005575, GO:0003674, GO:0005622, GO:0044281, GO:0005623, GO:0005634, GO:0008219, GO:0016491, GO:0005737, GO:0051186, GO:0005739, GO:0005829, GO:0034641	cofactor metabolic process, cell death, biological_process, cytosol, organelle, nucleus, cellular_component, cell, molecular_function, mitochondrion, cytoplasm, ion binding, cellular nitrogen compound metabolic process, generation of precursor metabolites and energy, small molecule metabolic process, oxidoreductase activity, intracellular	11.598	100	41.9	41.9	220.668	0.0873016	0.550516	0.351565	2.21694	4	4	31	Infinity	99.6753	Confident
C01R01	Q8CHT0	Delta-1-pyrroline-5-carboxylate dehydrogenase, mitochondrial (AL4A1_MOUSE)	ENSMUSG00000028737	Aldh4a1	4	GO:0044281, GO:0005623, GO:0008150, GO:0009056, GO:0005737, GO:0016491, GO:0005739, GO:0006520, GO:0043226, GO:0005575, GO:0003674, GO:0005622	cytoplasm, catabolic process, cellular amino acid metabolic process, biological_process, small molecule metabolic process, organelle, oxidoreductase activity, cell, cellular_component, intracellular, mitochondrion, molecular_function	61.8015	72.95	11.74	8.72	29.7484	0.0117692	0.168952	0.0473947	0.680372	7	7	16	Infinity	99.6753	Confident
C01R01	Q06185	ATP synthase subunit e, mitochondrial (ATP5I_MOUSE)		Atp5i		GO:0016887, GO:0008150, GO:0055085, GO:0022857, GO:0043234, GO:0009058, GO:0043226, GO:0006810, GO:0005575, GO:0005622, GO:0003674, GO:0044281, GO:0005623, GO:0005737, GO:0005739, GO:0034641	biological_process, transmembrane transporter activity, organelle, transport, protein complex, cellular_component, cell, atpase activity, molecular_function, mitochondrion, cytoplasm, transmembrane transport, cellular nitrogen compound metabolic process, biosynthetic process, small molecule metabolic process, intracellular	8.23047	100	50.7	50.7	243.272	0.0962441	0.637894	0.387577	2.56881	4	4	19	Infinity	99.6753	Confident
C01R01	Q8BFR5	Elongation factor Tu, mitochondrial (EFTU_MOUSE)	ENSMUSG00000073838	Tufm	7	GO:0008150, GO:0043167, GO:0008135, GO:0009058, GO:0043226, GO:0005575, GO:0003674, GO:0005622, GO:0006412, GO:0005623, GO:0003723, GO:0005737, GO:0003924, GO:0005739, GO:0034641	biological_process, organelle, gtpase activity, cellular_component, cell, rna binding, molecular_function, mitochondrion, cytoplasm, ion binding, cellular nitrogen compound metabolic process, translation factor activity, rna binding, biosynthetic process, translation, intracellular	49.477	94.03	3.1	3.1	27.9608	0.0110619	0.0444026	0.0445467	0.17881	1	1	5	Infinity	99.6753	Doubtful
C01R01	Q8BWT1	3-ketoacyl-CoA thiolase, mitochondrial (THIM_MOUSE)	ENSMUSG00000036880	Acaa2	18	GO:0008150, GO:0061024, GO:0016746, GO:0007165, GO:0009056, GO:0043226, GO:0006810, GO:0005575, GO:0003674, GO:0006950, GO:0007005, GO:0005622, GO:0044281, GO:0005623, GO:0008219, GO:0005737, GO:0006629, GO:0005739	mitochondrion organization, catabolic process, cell death, biological_process, signal transduction, organelle, transferase activity, transferring acyl groups, transport, cellular_component, cell, molecular_function, mitochondrion, cytoplasm, response to stress, membrane organization, small molecule metabolic process, lipid metabolic process, intracellular	41.8034	79.6	6.8	6.8	38.2013	0.0151134	0.118872	0.0608618	0.478701	5	5	12	Infinity	99.6753	Confident
C01R01	Q8BWF0	Succinate-semialdehyde dehydrogenase, mitochondrial (SSDH_MOUSE)	ENSMUSG00000035936	Aldh5a1	13	GO:0008150, GO:0006091, GO:0006790, GO:0065003, GO:0009056, GO:0006461, GO:0022607, GO:0048856, GO:0006520, GO:0043226, GO:0005575, GO:0005622, GO:0003674, GO:0044281, GO:0005623, GO:0005975, GO:0016491, GO:0005737, GO:0005739, GO:0051186, GO:0006629, GO:0034641	carbohydrate metabolic process, catabolic process, cellular amino acid metabolic process, cofactor metabolic process, biological_process, cellular component assembly, organelle, macromolecular complex assembly, cellular_component, cell, molecular_function, mitochondrion, cytoplasm, cellular nitrogen compound metabolic process, generation of precursor metabolites and energy, small molecule metabol…	55.9328	74.38	34.23	34.23	91.6739	0.0362684	0.652654	0.146053	2.62825	14	14	67	Infinity	99.6753	Confident
C01R01	Q7TQD2	Tubulin polymerization-promoting protein (TPPP_MOUSE)	ENSMUSG00000021573	Tppp	13	GO:0008150, GO:0007010, GO:0065003, GO:0006461, GO:0022607, GO:0043226, GO:0005575, GO:0003674, GO:0005622, GO:0005634, GO:0005623, GO:0005856, GO:0005737, GO:0005739, GO:0005829, GO:0008092	cytoskeleton organization, biological_process, cytoskeleton, cytosol, cellular component assembly, organelle, nucleus, macromolecular complex assembly, cellular_component, cell, molecular_function, mitochondrion, cytoplasm, protein complex assembly, cytoskeletal protein binding, intracellular	23.5601	88.07	44.5	44.5	214.286	0.0847768	0.701254	0.341398	2.82397	12	12	50	Infinity	99.6753	Confident
C01R01	Q3UIU2	NADH dehydrogenase [ubiquinone] 1 beta subcomplex subunit 6 (NDUB6_MOUSE)	ENSMUSG00000071014	Ndufb6	4	GO:0008150, GO:0006091, GO:0065003, GO:0006461, GO:0022607, GO:0043234, GO:0043226, GO:0005575, GO:0005622, GO:0007005, GO:0005654, GO:0044281, GO:0005634, GO:0005623, GO:0005737, GO:0005739, GO:0034641	mitochondrion organization, nucleoplasm, biological_process, cellular component assembly, organelle, nucleus, macromolecular complex assembly, protein complex, cellular_component, cell, mitochondrion, cytoplasm, cellular nitrogen compound metabolic process, generation of precursor metabolites and energy, small molecule metabolic process, protein complex assembly, intracellular	15.505	100	14.06	14.06	59.2419	0.0234375	0.128838	0.0943833	0.518833	1	1	4	Infinity	99.6753	Doubtful
C01R01	P06801	NADP-dependent malic enzyme (MAOX_MOUSE)	ENSMUSG00000032418	Me1	9	GO:0008150, GO:0065003, GO:0006461, GO:0022607, GO:0043167, GO:0016829, GO:0043226, GO:0005575, GO:0005622, GO:0003674, GO:0044281, GO:0005623, GO:0005737, GO:0016491, GO:0005739, GO:0051186, GO:0005829, GO:0034641	cofactor metabolic process, biological_process, cytosol, cellular component assembly, organelle, macromolecular complex assembly, cellular_component, cell, molecular_function, mitochondrion, cytoplasm, ion binding, cellular nitrogen compound metabolic process, small molecule metabolic process, lyase activity, protein complex assembly, oxidoreductase activity, intracellular	63.9131	80.07	3.15	3.15	4.67219	0.00184843	0.0360593	0.00744366	0.145212	3	3	4	Infinity	99.6753	Doubtful
C01R01	P67778	Prohibitin (PHB_MOUSE)	ENSMUSG00000038845	Phb	11	GO:0008283, GO:0009056, GO:0006464, GO:0048856, GO:0009058, GO:0043226, GO:0005575, GO:0003674, GO:0005654, GO:0005623, GO:0003700, GO:0005768, GO:0008219, GO:0031410, GO:0051604, GO:0034641, GO:0008150, GO:0007165, GO:0006259, GO:0005886, GO:0005622, GO:0000003, GO:0040007, GO:0002376, GO:0006950, GO:0007005, GO:0005634, GO:0003677, GO:0051276, GO:0005737, GO:0005739, GO:0019899	nucleoplasm, protein maturation, cellular_component, cell, molecular_function, cytoplasm, endosome, cellular nitrogen compound metabolic process, biosynthetic process, immune system process, enzyme binding, mitochondrion organization, catabolic process, chromosome organization, cell proliferation, cell death, dna metabolic process, biological_process, signal transduction, plasma membrane, organel…	29.8019	90.07	31.62	31.62	161.474	0.0638831	0.743329	0.257258	2.9934	8	8	37	Infinity	99.6753	Confident
C01R01	Q2NL51	Glycogen synthase kinase-3 alpha (GSK3A_MOUSE)	ENSMUSG00000057177	Gsk3a	7	GO:0009056, GO:0040011, GO:0043167, GO:0006464, GO:0048856, GO:0009058, GO:0043226, GO:0005575, GO:0003013, GO:0003674, GO:0005623, GO:0008219, GO:0006914, GO:0034641, GO:0008150, GO:0061024, GO:0006091, GO:0007165, GO:0007267, GO:0006259, GO:0007568, GO:0006810, GO:0005622, GO:0007005, GO:0040007, GO:0048870, GO:0005975, GO:0006605, GO:0005856, GO:0005737, GO:0005739, GO:0030154, GO:0016301, GO:…	carbohydrate metabolic process, cell differentiation, cell-cell signaling, locomotion, cellular_component, cell, molecular_function, cytoplasm, ion binding, cellular nitrogen compound metabolic process, biosynthetic process, membrane organization, protein targeting, enzyme binding, mitochondrion organization, catabolic process, autophagy, cell death, dna metabolic process, biological_process, sig…	51.6284	58.37	2.86	2.86	26.5138	0.0104895	0.0502111	0.0422415	0.202201	1	1	3	Infinity	99.6753	Doubtful
C01R01	P31786	Acyl-CoA-binding protein (ACBP_MOUSE)	ENSMUSG00000026385	Dbi	1	GO:0008150, GO:0048856, GO:0007267, GO:0043167, GO:0005794, GO:0005783, GO:0008289, GO:0043226, GO:0005576, GO:0005575, GO:0005622, GO:0006950, GO:0003674, GO:0005623, GO:0005615, GO:0005737, GO:0005739, GO:0006629, GO:0031410, GO:0050877	nervous system process, biological_process, cell-cell signaling, organelle, extracellular region, cellular_component, cell, lipid binding, molecular_function, mitochondrion, cytoplasm, ion binding, cytoplasmic vesicle, response to stress, lipid metabolic process, golgi apparatus, extracellular space, anatomical structure development, intracellular, endoplasmic reticulum	9.99414	100	55.17	55.17	157.373	0.0622605	0.719072	0.250724	2.89572	5	5	18	Infinity	99.6753	Confident
C01R01	Q8BVI4	Dihydropteridine reductase (DHPR_MOUSE)	ENSMUSG00000015806	Qdpr	5	GO:0008150, GO:0009056, GO:0048856, GO:0043167, GO:0006520, GO:0009058, GO:0043226, GO:0005575, GO:0005622, GO:0003674, GO:0044281, GO:0005623, GO:0005737, GO:0016491, GO:0005739, GO:0051186, GO:0005829, GO:0034641	catabolic process, cellular amino acid metabolic process, cofactor metabolic process, biological_process, cytosol, organelle, cellular_component, cell, molecular_function, mitochondrion, cytoplasm, ion binding, cellular nitrogen compound metabolic process, biosynthetic process, small molecule metabolic process, oxidoreductase activity, anatomical structure development, intracellular	25.5538	88.38	41.49	41.49	189.312	0.0748963	0.823348	0.301609	3.31564	8	8	38	Infinity	99.6753	Confident
C01R01	Q9CR68	Cytochrome b-c1 complex subunit Rieske, mitochondrial (UCRI_MOUSE)	ENSMUSG00000038462	Uqcrfs1	13	GO:0008150, GO:0006091, GO:0022857, GO:0043167, GO:0043234, GO:0043226, GO:0005575, GO:0003674, GO:0005622, GO:0005623, GO:0016491, GO:0005737, GO:0005739	biological_process, transmembrane transporter activity, organelle, protein complex, cellular_component, cell, molecular_function, mitochondrion, cytoplasm, ion binding, generation of precursor metabolites and energy, oxidoreductase activity, intracellular	29.3492	66.06	45.26	45.26	83.892	0.0331897	0.887392	0.133655	3.57354	12	12	48	Infinity	99.6753	Confident
C01R01	Q9CR62	Mitochondrial 2-oxoglutarate/malate carrier protein (M2OM_MOUSE)	ENSMUSG00000014606	Slc25a11	11	GO:0005623, GO:0008150, GO:0022857, GO:0005737, GO:0005739, GO:0043226, GO:0005575, GO:0006810, GO:0005622, GO:0003674	cytoplasm, biological_process, transmembrane transporter activity, organelle, transport, cell, cellular_component, intracellular, mitochondrion, molecular_function	34.1329	87.9	21.97	16.24	70.845	0.028028	0.545928	0.112869	2.19846	14	14	38	Infinity	99.6753	Confident
C01R01	P56812	Programmed cell death protein 5 (PDCD5_MOUSE)	ENSMUSG00000030417	Pdcd5	7	GO:0008283, GO:0061024, GO:0008150, GO:0055085, GO:0007165, GO:0043167, GO:0006457, GO:0043226, GO:0006810, GO:0005575, GO:0003674, GO:0005622, GO:0007005, GO:0005634, GO:0005623, GO:0006605, GO:0003677, GO:0008219, GO:0005737, GO:0005829, GO:0008092, GO:0030234	mitochondrion organization, cell proliferation, cell death, biological_process, signal transduction, cytosol, organelle, nucleus, transport, cellular_component, cell, molecular_function, cytoplasm, transmembrane transport, ion binding, membrane organization, enzyme regulator activity, dna binding, protein targeting, protein folding, cytoskeletal protein binding, intracellular	14.2663	100	19.84	19.84	50.1519	0.0198413	0.245197	0.0799012	0.987414	3	3	5	28.529	87.7574	Confident
C01R01	Q9DCT2	NADH dehydrogenase [ubiquinone] iron-sulfur protein 3, mitochondrial (NDUS3_MOUSE)	ENSMUSG00000111727	Ndufs3	CHR_MG191_PATCH	GO:0008150, GO:0006091, GO:0007165, GO:0043234, GO:0043226, GO:0005575, GO:0005622, GO:0003674, GO:0040007, GO:0005654, GO:0005623, GO:0005634, GO:0008219, GO:0005737, GO:0016491, GO:0005739	nucleoplasm, cell death, biological_process, signal transduction, organelle, nucleus, protein complex, cellular_component, cell, molecular_function, mitochondrion, cytoplasm, generation of precursor metabolites and energy, growth, oxidoreductase activity, intracellular	30.1305	88.59	19.77	19.77	113.728	0.0449937	0.34596	0.18119	1.39319	4	4	25	Infinity	99.6753	Confident
C01R01	Q9CQR4	Acyl-coenzyme A thioesterase 13 (ACO13_MOUSE)	ENSMUSG00000006717	Acot13	13	GO:0008150, GO:0065003, GO:0006461, GO:0022607, GO:0043226, GO:0005575, GO:0003674, GO:0005622, GO:0005623, GO:0005634, GO:0005856, GO:0005737, GO:0005739, GO:0005829	biological_process, cytoskeleton, cytosol, cellular component assembly, organelle, nucleus, macromolecular complex assembly, cellular_component, cell, molecular_function, mitochondrion, cytoplasm, protein complex assembly, intracellular	15.1729	81.43	15.71	15.71	54.164	0.0214286	0.311134	0.0862933	1.25294	2	2	5	Infinity	99.6753	Confident
C01R01	Q9DCS9	NADH dehydrogenase [ubiquinone] 1 beta subcomplex subunit 10 (NDUBA_MOUSE)	ENSMUSG00000040048	Ndufb10	17	GO:0008150, GO:0065003, GO:0006461, GO:0022607, GO:0043234, GO:0043226, GO:0005575, GO:0005622, GO:0007005, GO:0003674, GO:0005623, GO:0005737, GO:0005739	mitochondrion organization, biological_process, cellular component assembly, organelle, macromolecular complex assembly, protein complex, cellular_component, cell, molecular_function, mitochondrion, cytoplasm, protein complex assembly, intracellular	21.0104	100	34.09	34.09	122.074	0.0482955	0.359356	0.194487	1.44714	7	7	23	Infinity	99.6753	Confident
C01R01	P05202	Aspartate aminotransferase, mitochondrial (AATM_MOUSE)	ENSMUSG00000031672	Got2	8	GO:0008150, GO:0009056, GO:0043167, GO:0006520, GO:0008289, GO:0009058, GO:0043226, GO:0005575, GO:0006810, GO:0005886, GO:0003674, GO:0005622, GO:0044281, GO:0005623, GO:0005737, GO:0051186, GO:0005739, GO:0019899	enzyme binding, catabolic process, cellular amino acid metabolic process, cofactor metabolic process, biological_process, plasma membrane, organelle, transport, cellular_component, cell, lipid binding, molecular_function, mitochondrion, cytoplasm, ion binding, biosynthetic process, small molecule metabolic process, intracellular	47.3812	86.98	32.33	32.33	85.3077	0.0337498	0.890583	0.135911	3.5864	16	16	76	Infinity	99.6753	Confident
C01R01	Q9DCZ4	MICOS complex subunit Mic26 (MIC26_MOUSE)	ENSMUSG00000079508	Apoo	X	GO:0008150, GO:0061024, GO:0005794, GO:0005783, GO:0043234, GO:0005576, GO:0043226, GO:0005575, GO:0005622, GO:0003674, GO:0007005, GO:0005623, GO:0005737, GO:0005739, GO:0005829	mitochondrion organization, biological_process, cytosol, organelle, extracellular region, protein complex, cellular_component, cell, molecular_function, mitochondrion, cytoplasm, membrane organization, golgi apparatus, intracellular, endoplasmic reticulum	22.5896	72.22	5.05	5.05	51.0637	0.020202	0.115884	0.0813539	0.466667	2	2	11	22.4354	87.346	Doubtful
C01R01	Q8R1I1	Cytochrome b-c1 complex subunit 9 (QCR9_MOUSE)	ENSMUSG00000059534	Uqcr10	11	GO:0008150, GO:0006091, GO:0065003, GO:0022857, GO:0006461, GO:0022607, GO:0043234, GO:0043226, GO:0005575, GO:0003674, GO:0007005, GO:0005622, GO:0044281, GO:0005623, GO:0016491, GO:0005737, GO:0005739, GO:0034641	mitochondrion organization, biological_process, transmembrane transporter activity, cellular component assembly, organelle, macromolecular complex assembly, protein complex, cellular_component, cell, molecular_function, mitochondrion, cytoplasm, cellular nitrogen compound metabolic process, generation of precursor metabolites and energy, small molecule metabolic process, protein complex assembly,…	7.44087	100	26.56	26.56	157.978	0.0625	0.258925	0.251689	1.0427	1	1	6	Infinity	99.6753	Doubtful
C01R01	P18572	Basigin (BASI_MOUSE)	ENSMUSG00000023175	Bsg	10	GO:0008150, GO:0061024, GO:0048856, GO:0043226, GO:0005575, GO:0005622, GO:0003674, GO:0005886, GO:0000003, GO:0005623, GO:0007009, GO:0005737, GO:0005739, GO:0031410	biological_process, plasma membrane, organelle, cellular_component, cell, molecular_function, mitochondrion, cytoplasm, plasma membrane organization, cytoplasmic vesicle, membrane organization, anatomical structure development, intracellular, reproduction	42.4183	68.64	5.4	5.4	39.9485	0.0158046	0.125336	0.0636454	0.504729	5	5	19	Infinity	99.6753	Confident
C01R01	Q9CQX2	Cytochrome b5 type B (CYB5B_MOUSE)	ENSMUSG00000031924	Cyb5b	8	GO:0008150, GO:0005623, GO:0005737, GO:0005739, GO:0043167, GO:0043226, GO:0030234, GO:0005575, GO:0003674, GO:0005622	cytoplasm, ion binding, biological_process, organelle, enzyme regulator activity, cell, cellular_component, intracellular, mitochondrion, molecular_function	16.3078	58.9	27.4	27.4	240.729	0.0952381	0.637894	0.383526	2.56881	3	3	17	Infinity	99.6753	Confident
C01R01	Q9DCX2	ATP synthase subunit d, mitochondrial (ATP5H_MOUSE)	ENSMUSG00000034566	Atp5h	11	GO:0016887, GO:0008150, GO:0055085, GO:0022857, GO:0043234, GO:0009058, GO:0043226, GO:0005575, GO:0006810, GO:0005622, GO:0003674, GO:0005654, GO:0044281, GO:0005623, GO:0005634, GO:0005737, GO:0005739, GO:0034641	nucleoplasm, biological_process, transmembrane transporter activity, organelle, nucleus, transport, protein complex, cellular_component, cell, atpase activity, molecular_function, mitochondrion, cytoplasm, transmembrane transport, cellular nitrogen compound metabolic process, biosynthetic process, small molecule metabolic process, intracellular	18.7376	100	51.55	51.55	195.2	0.0772257	0.873817	0.310989	3.51888	8	8	40	Infinity	99.6753	Confident
C01R01	Q9CQV7	Mitochondrial import inner membrane translocase subunit TIM14 (TIM14_MOUSE)	ENSMUSG00000027679	Dnajc19	3	GO:0005623, GO:0008150, GO:0005737, GO:0005739, GO:0048856, GO:0043226, GO:0005575, GO:0006810, GO:0050877, GO:0003674, GO:0005622, GO:0000003	cytoplasm, nervous system process, biological_process, organelle, transport, cell, anatomical structure development, cellular_component, intracellular, mitochondrion, molecular_function, reproduction	12.4287	100	16.38	16.38	21.7901	0.00862069	0.136464	0.0347157	0.549542	1	1	1	Infinity	99.6753	Doubtful
C01R01	Q9DCW4	Electron transfer flavoprotein subunit beta (ETFB_MOUSE)	ENSMUSG00000004610	Etfb	7	GO:0008150, GO:0006091, GO:0009056, GO:0043234, GO:0043226, GO:0005575, GO:0005622, GO:0003674, GO:0044281, GO:0005623, GO:0016491, GO:0005737, GO:0005739, GO:0006629, GO:0005829	catabolic process, biological_process, cytosol, organelle, protein complex, cellular_component, cell, molecular_function, mitochondrion, cytoplasm, generation of precursor metabolites and energy, small molecule metabolic process, lipid metabolic process, oxidoreductase activity, intracellular	27.606	86.27	23.92	23.92	152.042	0.0601515	0.343399	0.242231	1.38288	7	7	28	Infinity	99.6753	Confident
C01R01	Q9DCN2	NADH-cytochrome b5 reductase 3 (NB5R3_MOUSE)	ENSMUSG00000018042	Cyb5r3	15	GO:0008150, GO:0043167, GO:0005783, GO:0009058, GO:0043226, GO:0005575, GO:0003674, GO:0005622, GO:0044281, GO:0005811, GO:0005623, GO:0016491, GO:0005737, GO:0006629, GO:0005739	lipid droplet, biological_process, organelle, cellular_component, cell, molecular_function, mitochondrion, cytoplasm, ion binding, biosynthetic process, small molecule metabolic process, lipid metabolic process, oxidoreductase activity, intracellular, endoplasmic reticulum	34.1057	81.73	13.29	13.29	115.461	0.045679	0.218188	0.18395	0.878647	7	7	26	Infinity	99.6753	Confident
C01R01	Q9CQQ7	ATP synthase F(0) complex subunit B1, mitochondrial (AT5F1_MOUSE)	ENSMUSG00000000563	Atp5f1	3	GO:0016887, GO:0008150, GO:0055085, GO:0022857, GO:0043234, GO:0009058, GO:0043226, GO:0005575, GO:0006810, GO:0005622, GO:0003674, GO:0005654, GO:0044281, GO:0005623, GO:0005634, GO:0005737, GO:0005739, GO:0034641	nucleoplasm, biological_process, transmembrane transporter activity, organelle, nucleus, transport, protein complex, cellular_component, cell, atpase activity, molecular_function, mitochondrion, cytoplasm, transmembrane transport, cellular nitrogen compound metabolic process, biosynthetic process, small molecule metabolic process, intracellular	28.9304	100	33.98	33.98	221.969	0.0878164	1.06199	0.353638	4.27664	11	11	86	Infinity	99.6753	Confident
C01R01	Q9CR21	Acyl carrier protein, mitochondrial (ACPM_MOUSE)	ENSMUSG00000030869	Ndufab1	7	GO:0008150, GO:0065003, GO:0006461, GO:0022607, GO:0006464, GO:0043167, GO:0043234, GO:0009058, GO:0043226, GO:0005575, GO:0007005, GO:0003674, GO:0005622, GO:0005654, GO:0044281, GO:0005634, GO:0005975, GO:0005623, GO:0005737, GO:0005739, GO:0006629, GO:0005829, GO:0051604	carbohydrate metabolic process, mitochondrion organization, nucleoplasm, protein maturation, biological_process, cytosol, cellular component assembly, organelle, nucleus, macromolecular complex assembly, protein complex, cellular_component, cell, molecular_function, mitochondrion, cytoplasm, ion binding, biosynthetic process, small molecule metabolic process, lipid metabolic process, protein comp…	17.359	80.13	14.74	14.74	192.102	0.076	0.311134	0.306054	1.25294	2	2	11	Infinity	99.6753	Confident
C01R01	Q9Z2I0	Mitochondrial proton/calcium exchanger protein (LETM1_MOUSE)	ENSMUSG00000005299	Letm1	5	GO:0061024, GO:0008150, GO:0055085, GO:0022857, GO:0065003, GO:0006461, GO:0022607, GO:0043167, GO:0043226, GO:0005575, GO:0006810, GO:0003674, GO:0005622, GO:0007005, GO:0005623, GO:0005737, GO:0042592, GO:0005739	mitochondrion organization, biological_process, transmembrane transporter activity, cellular component assembly, organelle, macromolecular complex assembly, transport, cellular_component, cell, molecular_function, mitochondrion, cytoplasm, transmembrane transport, ion binding, membrane organization, protein complex assembly, homeostatic process, intracellular	82.9369	94.04	6.64	6.64	27.3161	0.0108069	0.0673378	0.0435197	0.271171	5	5	17	Infinity	99.6753	Confident
C01R01	Q9Z2I9	Succinate--CoA ligase [ADP-forming] subunit beta, mitochondrial (SUCB1_MOUSE)	ENSMUSG00000022110	Sucla2	14	GO:0008150, GO:0006091, GO:0006790, GO:0043167, GO:0043226, GO:0005575, GO:0003674, GO:0005622, GO:0044281, GO:0005623, GO:0005737, GO:0005739, GO:0051186, GO:0016874	cofactor metabolic process, biological_process, organelle, cellular_component, cell, molecular_function, mitochondrion, cytoplasm, ion binding, generation of precursor metabolites and energy, small molecule metabolic process, sulfur compound metabolic process, ligase activity, intracellular	50.0821	80.56	21.6	21.6	77.5495	0.0306804	0.347813	0.123551	1.40065	10	10	40	Infinity	99.6753	Confident
C01R01	Q9D3D9	ATP synthase subunit delta, mitochondrial (ATPD_MOUSE)	ENSMUSG00000003072	Atp5d	10	GO:0016887, GO:0008150, GO:0055085, GO:0022857, GO:0043234, GO:0009058, GO:0043226, GO:0006810, GO:0005575, GO:0003674, GO:0005622, GO:0044281, GO:0005623, GO:0005737, GO:0005739, GO:0034641	biological_process, transmembrane transporter activity, organelle, transport, protein complex, cellular_component, cell, atpase activity, molecular_function, mitochondrion, cytoplasm, transmembrane transport, cellular nitrogen compound metabolic process, biosynthetic process, small molecule metabolic process, intracellular	17.5891	33.93	23.21	23.21	317.804	0.125731	0.778279	0.506321	3.13415	4	4	16	Infinity	99.6753	Confident
C01R01	Q9CRD0	OCIA domain-containing protein 1 (OCAD1_MOUSE)	ENSMUSG00000029152	Ociad1	5	GO:0008150, GO:0005623, GO:0005768, GO:0005737, GO:0005739, GO:0030154, GO:0031410, GO:0043226, GO:0005575, GO:0005622, GO:0003674	cytoplasm, endosome, cell differentiation, cytoplasmic vesicle, biological_process, organelle, cell, cellular_component, intracellular, mitochondrion, molecular_function	27.5928	75.71	15.79	15.79	17.8843	0.00707547	0.160155	0.0284931	0.644949	5	5	6	Infinity	99.6753	Confident
C01R01	Q9CQZ6	NADH dehydrogenase [ubiquinone] 1 beta subcomplex subunit 3 (NDUB3_MOUSE)	ENSMUSG00000026032	Ndufb3	1	GO:0008150, GO:0006091, GO:0065003, GO:0006461, GO:0022607, GO:0043234, GO:0043226, GO:0005575, GO:0005622, GO:0003674, GO:0007005, GO:0005623, GO:0005737, GO:0005739	mitochondrion organization, biological_process, cellular component assembly, organelle, macromolecular complex assembly, protein complex, cellular_component, cell, molecular_function, mitochondrion, cytoplasm, generation of precursor metabolites and energy, protein complex assembly, intracellular	11.6848	100	10.58	10.58	170.131	0.0673077	0.178769	0.271049	0.719905	3	3	11	Infinity	99.6753	Doubtful
C01R01	Q9CQZ5	NADH dehydrogenase [ubiquinone] 1 alpha subcomplex subunit 6 (NDUA6_MOUSE)	ENSMUSG00000022450	Ndufa6	15	GO:0005623, GO:0008150, GO:0005737, GO:0005739, GO:0043234, GO:0043226, GO:0005575, GO:0005622, GO:0006950, GO:0003674	cytoplasm, biological_process, response to stress, organelle, cell, protein complex, cellular_component, intracellular, mitochondrion, molecular_function	15.273	100	27.48	27.48	93.2595	0.0368957	0.350314	0.14858	1.41072	4	4	16	Infinity	99.6753	Confident
C01R01	P42125	Enoyl-CoA delta isomerase 1, mitochondrial (ECI1_MOUSE)	ENSMUSG00000024132	Eci1	17	GO:0008150, GO:0009056, GO:0016829, GO:0043226, GO:0005575, GO:0005622, GO:0003674, GO:0044281, GO:0005623, GO:0005737, GO:0006629, GO:0005739, GO:0016853	catabolic process, biological_process, organelle, cellular_component, cell, molecular_function, mitochondrion, cytoplasm, small molecule metabolic process, lyase activity, lipid metabolic process, isomerase activity, intracellular	32.2298	89.62	14.88	14.88	71.4274	0.0282584	0.193777	0.113797	0.780342	6	6	15	Infinity	99.6753	Confident
C01R01	Q9CPQ8	ATP synthase subunit g, mitochondrial (ATP5L_MOUSE)	ENSMUSG00000038717	Atp5l	9	GO:0016887, GO:0008150, GO:0055085, GO:0022857, GO:0009058, GO:0043234, GO:0043226, GO:0006810, GO:0005575, GO:0003674, GO:0005622, GO:0044281, GO:0005623, GO:0005737, GO:0005739, GO:0034641	biological_process, transmembrane transporter activity, organelle, transport, protein complex, cellular_component, cell, atpase activity, molecular_function, mitochondrion, cytoplasm, transmembrane transport, cellular nitrogen compound metabolic process, biosynthetic process, small molecule metabolic process, intracellular	11.4172	100	33.01	33.01	453.996	0.179612	0.701254	0.7233	2.82397	3	3	27	Infinity	99.6753	Confident
C01R01	Q9CPQ1	Cytochrome c oxidase subunit 6C (COX6C_MOUSE)	ENSMUSG00000014313	Cox6c	15	GO:0008150, GO:0006091, GO:0055085, GO:0022857, GO:0043226, GO:0006810, GO:0005575, GO:0005622, GO:0003674, GO:0005623, GO:0005737, GO:0016491, GO:0005739	biological_process, transmembrane transporter activity, organelle, transport, cellular_component, cell, molecular_function, mitochondrion, cytoplasm, transmembrane transport, generation of precursor metabolites and energy, oxidoreductase activity, intracellular	8.46351	100	43.42	43.42	321.5	0.127193	1.03092	0.512209	4.15153	4	4	15	Infinity	99.6753	Confident
C01R01	Q9CPP6	NADH dehydrogenase [ubiquinone] 1 alpha subcomplex subunit 5 (NDUA5_MOUSE)	ENSMUSG00000023089	Ndufa5	6	GO:0008150, GO:0006091, GO:0065003, GO:0006461, GO:0022607, GO:0043234, GO:0043226, GO:0005575, GO:0005622, GO:0003674, GO:0007005, GO:0005623, GO:0005737, GO:0016491, GO:0005739	mitochondrion organization, biological_process, cellular component assembly, organelle, macromolecular complex assembly, protein complex, cellular_component, cell, molecular_function, mitochondrion, cytoplasm, generation of precursor metabolites and energy, protein complex assembly, oxidoreductase activity, intracellular	13.3512	100	25	25	54.4753	0.0215517	0.29155	0.0867892	1.17408	4	4	6	Infinity	99.6753	Confident
C01R01	P97450	ATP synthase-coupling factor 6, mitochondrial (ATP5J_MOUSE)	ENSMUSG00000022890	Atp5j	16	GO:0016887, GO:0008150, GO:0055085, GO:0022857, GO:0009058, GO:0043234, GO:0043226, GO:0005575, GO:0006810, GO:0005622, GO:0003674, GO:0044281, GO:0005623, GO:0005737, GO:0005739, GO:0034641	biological_process, transmembrane transporter activity, organelle, transport, protein complex, cellular_component, cell, atpase activity, molecular_function, mitochondrion, cytoplasm, transmembrane transport, cellular nitrogen compound metabolic process, biosynthetic process, small molecule metabolic process, intracellular	12.4886	100	34.26	34.26	97.5175	0.0385802	0.43845	0.155363	1.76565	4	4	16	Infinity	99.6753	Confident
C01R01	Q9CQ85	Mitochondrial import inner membrane translocase subunit Tim22 (TIM22_MOUSE)	ENSMUSG00000020843	Timm22	11	GO:0061024, GO:0008150, GO:0055085, GO:0043234, GO:0043226, GO:0005575, GO:0006810, GO:0003674, GO:0005622, GO:0007005, GO:0005623, GO:0006605, GO:0005737, GO:0005739	mitochondrion organization, biological_process, organelle, transport, protein complex, cellular_component, cell, molecular_function, mitochondrion, cytoplasm, transmembrane transport, membrane organization, protein targeting, intracellular	20.101	69.07	7.73	7.73	31.0142	0.0122699	0.122018	0.0494113	0.491371	2	2	4	Infinity	99.6753	Doubtful
C01R01	Q9CPV4	Glyoxalase domain-containing protein 4 (GLOD4_MOUSE)	ENSMUSG00000017286	Glod4	11	GO:0005623, GO:0005737, GO:0005739, GO:0043226, GO:0005575, GO:0003674, GO:0005622	cytoplasm, organelle, cell, cellular_component, intracellular, mitochondrion, molecular_function	33.2955	82.89	11.07	11.07	110.267	0.0436242	0.140625	0.175675	0.566299	2	2	16	Infinity	99.6753	Confident
C01R01	Q9CQ75	NADH dehydrogenase [ubiquinone] 1 alpha subcomplex subunit 2 (NDUA2_MOUSE)	ENSMUSG00000014294	Ndufa2	18	GO:0008150, GO:0065003, GO:0006461, GO:0022607, GO:0043234, GO:0043226, GO:0005575, GO:0007005, GO:0003674, GO:0005622, GO:0005623, GO:0005737, GO:0016491, GO:0005739	mitochondrion organization, biological_process, cellular component assembly, organelle, macromolecular complex assembly, protein complex, cellular_component, cell, molecular_function, mitochondrion, cytoplasm, protein complex assembly, oxidoreductase activity, intracellular	10.9088	100	14.14	14.14	459.573	0.181818	0.154782	0.732185	0.62331	2	2	19	Infinity	99.6753	Doubtful
C01R01	Q9Z1P6	NADH dehydrogenase [ubiquinone] 1 alpha subcomplex subunit 7 (NDUA7_MOUSE)	ENSMUSG00000041881	Ndufa7	17	GO:0008150, GO:0006091, GO:0005198, GO:0009058, GO:0043234, GO:0005840, GO:0043226, GO:0005575, GO:0003674, GO:0005622, GO:0006412, GO:0044281, GO:0005623, GO:0003735, GO:0005737, GO:0016491, GO:0005739, GO:0034641	biological_process, organelle, structural molecule activity, protein complex, cellular_component, cell, molecular_function, mitochondrion, cytoplasm, cellular nitrogen compound metabolic process, generation of precursor metabolites and energy, biosynthetic process, small molecule metabolic process, translation, ribosome, oxidoreductase activity, intracellular, structural constituent of ribosome	12.5676	100	20.35	20.35	134.212	0.0530973	0.258925	0.213824	1.0427	4	4	11	Infinity	99.6753	Confident
C01R01	Q9CQ69	Cytochrome b-c1 complex subunit 8 (QCR8_MOUSE)	ENSMUSG00000044894	Uqcrq	11	GO:0008150, GO:0006091, GO:0022857, GO:0048856, GO:0043234, GO:0043226, GO:0005575, GO:0005622, GO:0003674, GO:0044281, GO:0005623, GO:0005737, GO:0016491, GO:0005739, GO:0030154, GO:0034641	cell differentiation, biological_process, transmembrane transporter activity, organelle, protein complex, cellular_component, cell, molecular_function, mitochondrion, cytoplasm, cellular nitrogen compound metabolic process, generation of precursor metabolites and energy, small molecule metabolic process, oxidoreductase activity, anatomical structure development, intracellular	9.76211	100	28.05	28.05	277.425	0.109756	0.389495	0.44199	1.56851	2	2	12	Infinity	99.6753	Confident
C01R01	Q9DC70	NADH dehydrogenase [ubiquinone] iron-sulfur protein 7, mitochondrial (NDUS7_MOUSE)	ENSMUSG00000020153	Ndufs7	10	GO:0008150, GO:0065003, GO:0006461, GO:0022607, GO:0043167, GO:0043234, GO:0043226, GO:0005575, GO:0003674, GO:0005622, GO:0007005, GO:0005886, GO:0005623, GO:0016491, GO:0005737, GO:0005739, GO:0019899	enzyme binding, mitochondrion organization, biological_process, plasma membrane, cellular component assembly, organelle, macromolecular complex assembly, protein complex, cellular_component, cell, molecular_function, mitochondrion, cytoplasm, ion binding, protein complex assembly, oxidoreductase activity, intracellular	24.6668	75.89	10.27	10.27	90.2733	0.0357143	0.172102	0.143822	0.693059	3	3	13	Infinity	99.6753	Confident
C01R01	Q9CQ54	NADH dehydrogenase [ubiquinone] 1 subunit C2 (NDUC2_MOUSE)	ENSMUSG00000030647	Ndufc2	7	GO:0008150, GO:0006091, GO:0065003, GO:0007165, GO:0006461, GO:0022607, GO:0009058, GO:0043234, GO:0043226, GO:0005575, GO:0005622, GO:0006950, GO:0007005, GO:0003674, GO:0044281, GO:0005623, GO:0008219, GO:0016491, GO:0005737, GO:0005739, GO:0034641	mitochondrion organization, cell death, biological_process, signal transduction, cellular component assembly, organelle, macromolecular complex assembly, protein complex, cellular_component, cell, molecular_function, mitochondrion, cytoplasm, cellular nitrogen compound metabolic process, generation of precursor metabolites and energy, biosynthetic process, response to stress, small molecule metab…	14.1542	100	25.83	25.83	154.468	0.0611111	0.584893	0.246096	2.35538	3	3	21	Infinity	99.6753	Confident
C01R01	Q9DC69	NADH dehydrogenase [ubiquinone] 1 alpha subcomplex subunit 9, mitochondrial (NDUA9_MOUSE)	ENSMUSG00000000399	Ndufa9	6	GO:0008150, GO:0065003, GO:0006461, GO:0022607, GO:0043234, GO:0009058, GO:0043226, GO:0005575, GO:0003674, GO:0005622, GO:0007005, GO:0005654, GO:0044281, GO:0005623, GO:0005634, GO:0005737, GO:0016491, GO:0005739, GO:0051186	mitochondrion organization, nucleoplasm, cofactor metabolic process, biological_process, cellular component assembly, organelle, nucleus, macromolecular complex assembly, protein complex, cellular_component, cell, molecular_function, mitochondrion, cytoplasm, biosynthetic process, small molecule metabolic process, protein complex assembly, oxidoreductase activity, intracellular	42.4984	92.84	14.06	14.06	72.6337	0.0287356	0.158323	0.115719	0.637571	5	5	28	Infinity	99.6753	Confident
C01R01	P07901	Heat shock protein HSP 90-alpha (HS90A_MOUSE)	ENSMUSG00000021270	Hsp90aa1	12	GO:0016887, GO:0009056, GO:0006461, GO:0022607, GO:0048856, GO:0006464, GO:0043167, GO:0007155, GO:0009058, GO:0043226, GO:0005575, GO:0003674, GO:0005623, GO:0005829, GO:0031410, GO:0034641, GO:0008150, GO:0061024, GO:0055085, GO:0065003, GO:0007165, GO:0000902, GO:0022618, GO:0051082, GO:0006259, GO:0006457, GO:0006810, GO:0005622, GO:0040007, GO:0007005, GO:0006950, GO:0005886, GO:0002376, GO:…	cell differentiation, cellular component assembly, cellular_component, cell, molecular_function, cytoplasm, ion binding, cellular nitrogen compound metabolic process, biosynthetic process, cell adhesion, membrane organization, enzyme regulator activity, cell morphogenesis, protein targeting, protein folding, immune system process, homeostatic process, cytoskeletal protein binding, unfolded protei…	84.7348	81.99	11.6	11.6	38.0691	0.015061	0.135131	0.0606511	0.544174	9	6	31	Infinity	99.6753	Confident
C01R01	Q9DBL1	Short/branched chain specific acyl-CoA dehydrogenase, mitochondrial (ACDSB_MOUSE)	ENSMUSG00000030861	Acadsb	7	GO:0008150, GO:0006790, GO:0043167, GO:0043226, GO:0005575, GO:0003674, GO:0005622, GO:0044281, GO:0005623, GO:0016491, GO:0005737, GO:0006629, GO:0051186, GO:0005739	cofactor metabolic process, biological_process, organelle, cellular_component, cell, molecular_function, mitochondrion, cytoplasm, ion binding, small molecule metabolic process, lipid metabolic process, sulfur compound metabolic process, oxidoreductase activity, intracellular	47.8433	78.01	4.17	4.17	20.9474	0.00828729	0.0502111	0.0333731	0.202201	2	2	4	Infinity	99.6753	Doubtful
C01R01	Q64521	Glycerol-3-phosphate dehydrogenase, mitochondrial (GPDM_MOUSE)	ENSMUSG00000026827	Gpd2	2	GO:0008150, GO:0009056, GO:0043167, GO:0048856, GO:0009058, GO:0043226, GO:0005575, GO:0003674, GO:0040007, GO:0005622, GO:0044281, GO:0005975, GO:0005623, GO:0016491, GO:0005737, GO:0005739	carbohydrate metabolic process, catabolic process, biological_process, organelle, cellular_component, cell, molecular_function, mitochondrion, cytoplasm, ion binding, biosynthetic process, small molecule metabolic process, growth, oxidoreductase activity, anatomical structure development, intracellular	80.9025	83.63	14.17	14.17	43.1686	0.0170785	0.276093	0.0687756	1.11183	12	12	45	Infinity	99.6753	Confident
C01R01	P24472	Glutathione S-transferase A4 (GSTA4_MOUSE)	ENSMUSG00000032348	Gsta4	9	GO:0008150, GO:0006790, GO:0043167, GO:0043226, GO:0005575, GO:0003674, GO:0006950, GO:0005622, GO:0005623, GO:0005737, GO:0051186, GO:0005739, GO:0034641, GO:0016765	cofactor metabolic process, biological_process, organelle, transferase activity, transferring alkyl or aryl (other than methyl) groups, cellular_component, cell, molecular_function, mitochondrion, cytoplasm, ion binding, cellular nitrogen compound metabolic process, response to stress, sulfur compound metabolic process, intracellular	25.5474	80.18	21.62	21.62	106.502	0.0421348	0.268961	0.169678	1.08311	4	4	20	Infinity	99.6753	Confident
C01R01	Q8C5H8	NAD kinase 2, mitochondrial (NAKD2_MOUSE)	ENSMUSG00000111527	Nadk2	CHR_MG4288_PATCH	GO:0008150, GO:0043167, GO:0009058, GO:0043226, GO:0005575, GO:0005622, GO:0003674, GO:0044281, GO:0005623, GO:0005737, GO:0051186, GO:0005739, GO:0034641, GO:0016301	cofactor metabolic process, biological_process, organelle, cellular_component, cell, molecular_function, mitochondrion, cytoplasm, ion binding, cellular nitrogen compound metabolic process, biosynthetic process, kinase activity, small molecule metabolic process, intracellular	50.8269	87.83	6.86	6.86	30.7568	0.0121681	0.0784174	0.0490014	0.315788	2	2	7	Infinity	99.6753	Confident
C01R01	Q9CQA3	Succinate dehydrogenase [ubiquinone] iron-sulfur subunit, mitochondrial (SDHB_MOUSE)	ENSMUSG00000009863	Sdhb	4	GO:0008150, GO:0006091, GO:0043167, GO:0043234, GO:0043226, GO:0005575, GO:0003674, GO:0005622, GO:0005886, GO:0005654, GO:0044281, GO:0005623, GO:0005634, GO:0016491, GO:0005737, GO:0005739	nucleoplasm, biological_process, plasma membrane, organelle, nucleus, protein complex, cellular_component, cell, molecular_function, mitochondrion, cytoplasm, ion binding, generation of precursor metabolites and energy, small molecule metabolic process, oxidoreductase activity, intracellular	31.7929	90.78	18.79	18.79	103.825	0.0410757	0.315369	0.165412	1.27	6	6	35	Infinity	99.6753	Confident
C01R01	Q9CQH3	NADH dehydrogenase [ubiquinone] 1 beta subcomplex subunit 5, mitochondrial (NDUB5_MOUSE)	ENSMUSG00000027673	Ndufb5	3	GO:0008150, GO:0065003, GO:0006461, GO:0022607, GO:0043234, GO:0043226, GO:0005575, GO:0005622, GO:0007005, GO:0003674, GO:0005654, GO:0005623, GO:0005634, GO:0005737, GO:0005739	mitochondrion organization, nucleoplasm, biological_process, cellular component assembly, organelle, nucleus, macromolecular complex assembly, protein complex, cellular_component, cell, molecular_function, mitochondrion, cytoplasm, protein complex assembly, intracellular	21.6964	77.78	14.29	4.23	68.7797	0.0272109	0.29155	0.109579	1.17408	4	4	13	Infinity	99.6753	Doubtful
C01R01	Q9D2G2	Dihydrolipoyllysine-residue succinyltransferase component of 2-oxoglutarate dehydrogenase complex, mitochondrial (ODO2_MOUSE)	ENSMUSG00000004789	Dlst	12	GO:0008150, GO:0016746, GO:0006091, GO:0006790, GO:0009056, GO:0006464, GO:0006520, GO:0043234, GO:0043226, GO:0005575, GO:0003674, GO:0005622, GO:0044281, GO:0005623, GO:0005634, GO:0005737, GO:0051186, GO:0005739	catabolic process, cellular amino acid metabolic process, cofactor metabolic process, biological_process, organelle, transferase activity, transferring acyl groups, nucleus, protein complex, cellular_component, cell, molecular_function, mitochondrion, cytoplasm, generation of precursor metabolites and energy, small molecule metabolic process, sulfur compound metabolic process, cellular protein mo…	48.9635	76.65	9.03	6.39	42.3697	0.0167625	0.13921	0.0675027	0.560601	6	6	19	Infinity	99.6753	Confident
C01R01	O54983	Ketimine reductase mu-crystallin (CRYM_MOUSE)	ENSMUSG00000030905	Crym	7	GO:0008150, GO:0000988, GO:0009058, GO:0043226, GO:0005575, GO:0006810, GO:0003674, GO:0005622, GO:0005634, GO:0005623, GO:0005737, GO:0016491, GO:0005739, GO:0005829, GO:0034641, GO:0050877	nervous system process, biological_process, cytosol, organelle, nucleus, transport, cellular_component, cell, molecular_function, mitochondrion, transcription factor activity, protein binding, cytoplasm, cellular nitrogen compound metabolic process, biosynthetic process, oxidoreductase activity, intracellular	33.5021	51.12	39.62	39.62	189.11	0.0748166	1.75423	0.301288	7.06431	12	12	64	Infinity	99.6753	Confident
C01R01	Q8R164	Valacyclovir hydrolase (BPHL_MOUSE)	ENSMUSG00000038286	Bphl	13	GO:0005623, GO:0005737, GO:0005739, GO:0043226, GO:0005575, GO:0003674, GO:0005622	cytoplasm, organelle, cell, cellular_component, intracellular, mitochondrion, molecular_function	32.8301	100	4.12	4.12	78.1749	0.0309278	0.0660505	0.124547	0.265987	2	2	11	Infinity	99.6753	Doubtful
C01R01	Q9CPY7	Cytosol aminopeptidase (AMPL_MOUSE)	ENSMUSG00000039682	Lap3	5	GO:0008150, GO:0043167, GO:0005794, GO:0008233, GO:0043226, GO:0005575, GO:0003674, GO:0005622, GO:0005654, GO:0005634, GO:0005623, GO:0005737, GO:0005739, GO:0005829	nucleoplasm, biological_process, cytosol, organelle, nucleus, peptidase activity, cellular_component, cell, molecular_function, mitochondrion, cytoplasm, ion binding, golgi apparatus, intracellular	56.1057	81.12	3.08	3.08	11.234	0.00444444	0.0404983	0.0178979	0.163088	4	4	11	Infinity	99.6753	Doubtful
C01R01	Q9CQ92	Mitochondrial fission 1 protein (FIS1_MOUSE)	ENSMUSG00000019054	Fis1	5	GO:0008150, GO:0061024, GO:0065003, GO:0009056, GO:0007165, GO:0006461, GO:0022607, GO:0048856, GO:0005783, GO:0043226, GO:0005575, GO:0006810, GO:0007005, GO:0003674, GO:0005622, GO:0005777, GO:0006605, GO:0005623, GO:0008219, GO:0005737, GO:0006914, GO:0042592, GO:0005739	mitochondrion organization, catabolic process, autophagy, cell death, biological_process, signal transduction, cellular component assembly, organelle, peroxisome, macromolecular complex assembly, transport, cellular_component, cell, molecular_function, mitochondrion, cytoplasm, membrane organization, protein targeting, protein complex assembly, homeostatic process, anatomical structure developmen…	16.998	80.92	34.21	34.21	106.705	0.0422149	0.467799	0.17	1.88384	4	4	14	Infinity	99.6753	Confident
C01R01	P30275	Creatine kinase U-type, mitochondrial (KCRU_MOUSE)	ENSMUSG00000000308	Ckmt1	2	GO:0005623, GO:0008150, GO:0008219, GO:0005737, GO:0005739, GO:0043167, GO:0043226, GO:0005575, GO:0016301, GO:0005622, GO:0003674	cytoplasm, ion binding, cell death, biological_process, kinase activity, organelle, cell, cellular_component, intracellular, mitochondrion, molecular_function	46.9742	72.97	24.4	24.4	97.42	0.0385417	0.279802	0.155208	1.12677	7	7	30	Infinity	99.6753	Confident
C01R01	P00405	Cytochrome c oxidase subunit 2 (COX2_MOUSE)		Mtco2		GO:0008150, GO:0006091, GO:0055085, GO:0022857, GO:0043167, GO:0048856, GO:0043234, GO:0043226, GO:0005575, GO:0006810, GO:0003674, GO:0005622, GO:0006950, GO:0044281, GO:0005623, GO:0005737, GO:0016491, GO:0005739, GO:0034641	biological_process, transmembrane transporter activity, organelle, transport, protein complex, cellular_component, cell, molecular_function, mitochondrion, cytoplasm, transmembrane transport, ion binding, cellular nitrogen compound metabolic process, generation of precursor metabolites and energy, response to stress, small molecule metabolic process, oxidoreductase activity, anatomical structure …	25.959	31.28	20.26	20.26	344.141	0.13615	0.995262	0.54828	4.00794	3	3	18	Infinity	99.6753	Confident
C01R02	O55042	Alpha-synuclein (SYUA_MOUSE)	ENSMUSG00000025889	Snca	6	GO:0007010, GO:0022607, GO:0005794, GO:0043226, GO:0044281, GO:0005623, GO:0008219, GO:0016491, GO:0006914, GO:0005829, GO:0008150, GO:0006091, GO:0065003, GO:0007267, GO:0005840, GO:0006810, GO:0005886, GO:0002376, GO:0005635, GO:0005634, GO:0042393, GO:0042592, GO:0006461, GO:0040011, GO:0009056, GO:0043167, GO:0048856, GO:0006464, GO:0008289, GO:0009058, GO:0005576, GO:0005575, GO:0003674, GO:…	cell-cell signaling, cellular component assembly, molecular_function, enzyme regulator activity, immune system process, extracellular space, homeostatic process, enzyme binding, catabolic process, autophagy, cofactor metabolic process, signal transduction, cytoskeleton, organelle, nuclear envelope, macromolecular complex assembly, mitochondrion, generation of precursor metabolites and energy, res…	14.4762	72.14	50.71	50.71	402.172	0.0824257	1.73842	0.679055	14.3218	8	4	19	Infinity	100	Confident
C01R02	Q9CWZ7	Gamma-soluble NSF attachment protein (SNAG_MOUSE)	ENSMUSG00000024581	Napg	18	GO:0008150, GO:0061024, GO:0043234, GO:0043226, GO:0006810, GO:0005773, GO:0005575, GO:0003674, GO:0005622, GO:0005623, GO:0016192, GO:0005737, GO:0005739	vacuole, biological_process, organelle, transport, protein complex, cellular_component, cell, molecular_function, mitochondrion, cytoplasm, membrane organization, intracellular, vesicle-mediated transport	34.7103	76.92	18.91	18.91	122.281	0.0250617	0.343399	0.206468	2.82906	6	6	14	Infinity	100	Confident
C01R02	P48962	ADP/ATP translocase 1 (ADT1_MOUSE)	ENSMUSG00000031633	Slc25a4	8	GO:0061024, GO:0008150, GO:0055085, GO:0022857, GO:0043226, GO:0005575, GO:0006810, GO:0003674, GO:0005622, GO:0007005, GO:0005623, GO:0008219, GO:0005737, GO:0005739	mitochondrion organization, cell death, biological_process, transmembrane transporter activity, organelle, transport, cellular_component, cell, molecular_function, mitochondrion, cytoplasm, transmembrane transport, membrane organization, intracellular	32.8831	81.21	43.62	43.62	120.933	0.0247853	1.81838	0.204191	14.9805	20	9	47	Infinity	100	Confident
C01R02	Q99JR1	Sideroflexin-1 (SFXN1_MOUSE)	ENSMUSG00000021474	Sfxn1	13	GO:0008150, GO:0055085, GO:0022857, GO:0048856, GO:0043226, GO:0005575, GO:0006810, GO:0005622, GO:0002376, GO:0003674, GO:0005623, GO:0005737, GO:0042592, GO:0005739, GO:0030154	cell differentiation, biological_process, transmembrane transporter activity, organelle, transport, cellular_component, cell, molecular_function, mitochondrion, cytoplasm, transmembrane transport, immune system process, homeostatic process, anatomical structure development, intracellular	35.6263	79.81	17.08	17.08	73.1384	0.0149898	0.433013	0.123492	3.56733	5	3	9	Infinity	100	Confident
C01R02	P52196	Thiosulfate sulfurtransferase (THTR_MOUSE)	ENSMUSG00000044986	Tst	15	GO:0008150, GO:0055085, GO:0048856, GO:0043226, GO:0005575, GO:0006810, GO:0005622, GO:0003674, GO:0005623, GO:0003723, GO:0005737, GO:0005739, GO:0030154, GO:0019843	cell differentiation, biological_process, organelle, transport, cellular_component, cell, rna binding, molecular_function, mitochondrion, cytoplasm, transmembrane transport, rrna binding, anatomical structure development, intracellular	33.4448	74.07	9.43	9.43	221.782	0.0454545	0.140625	0.374472	1.15852	2	2	11	Infinity	100	Confident
C01R02	O08749	Dihydrolipoyl dehydrogenase, mitochondrial (DLDH_MOUSE)	ENSMUSG00000020664	Dld	12	GO:0009790, GO:0048856, GO:0006464, GO:0043167, GO:0009058, GO:0043226, GO:0005773, GO:0005575, GO:0003674, GO:0005654, GO:0044281, GO:0005623, GO:0016491, GO:0051186, GO:0005929, GO:0031410, GO:0034641, GO:0008150, GO:0006091, GO:0006790, GO:0021700, GO:0043234, GO:0007568, GO:0005622, GO:0000003, GO:0005634, GO:0005737, GO:0042592, GO:0005739, GO:0006629, GO:0030154	nucleoplasm, cell differentiation, embryo development, cellular_component, cell, protein complex, molecular_function, developmental maturation, cytoplasm, cilium, ion binding, cellular nitrogen compound metabolic process, biosynthetic process, sulfur compound metabolic process, homeostatic process, cofactor metabolic process, vacuole, biological_process, organelle, nucleus, mitochondrion, cytopla…	54.2382	74.26	10.02	10.02	70.4506	0.0144389	0.136464	0.118954	1.12424	3	3	10	Infinity	100	Confident
C01R02	Q8VDQ8	NAD-dependent protein deacetylase sirtuin-2 (SIR2_MOUSE)	ENSMUSG00000015149	Sirt2	7	GO:0008283, GO:0006461, GO:0009056, GO:0022607, GO:0048856, GO:0006464, GO:0043167, GO:0007059, GO:0005694, GO:0009058, GO:0005730, GO:0043226, GO:0005575, GO:0003674, GO:0051301, GO:0005623, GO:0008219, GO:0006914, GO:0005829, GO:0034641, GO:0016810, GO:0032182, GO:0008150, GO:0065003, GO:0007165, GO:0000228, GO:0021700, GO:0008134, GO:0006950, GO:0005886, GO:0005622, GO:0000003, GO:0007049, GO:…	cell differentiation, cellular component assembly, transcription factor binding, cellular_component, cell, molecular_function, developmental maturation, cytoplasm, ion binding, cellular nitrogen compound metabolic process, biosynthetic process, nucleolus, enzyme binding, catabolic process, autophagy, chromosome organization, cell proliferation, cell death, cytosol, biological_process, signal tran…	43.2284	86.38	20.31	20.31	73.7048	0.0151059	0.467799	0.124448	3.85391	9	9	16	Infinity	100	Confident
C01R02	P61922	4-aminobutyrate aminotransferase, mitochondrial (GABT_MOUSE)	ENSMUSG00000057880	Abat	16	GO:0009056, GO:0048856, GO:0043167, GO:0006520, GO:0007155, GO:0009058, GO:0043226, GO:0005575, GO:0003013, GO:0003674, GO:0044281, GO:0005623, GO:0034641, GO:0008150, GO:0007165, GO:0007267, GO:0007568, GO:0006810, GO:0005622, GO:0000003, GO:0006950, GO:0005737, GO:0042592, GO:0005739, GO:0019899	cellular amino acid metabolic process, cell-cell signaling, cellular_component, cell, molecular_function, cytoplasm, ion binding, cellular nitrogen compound metabolic process, biosynthetic process, cell adhesion, homeostatic process, enzyme binding, catabolic process, biological_process, signal transduction, organelle, transport, mitochondrion, circulatory system process, response to stress, smal…	56.4156	88.6	39	39	83.6619	0.0171466	0.813931	0.14126	6.70548	15	15	36	Infinity	100	Confident
C01R02	O88844	Isocitrate dehydrogenase [NADP] cytoplasmic (IDHC_MOUSE)	ENSMUSG00000025950	Idh1	1	GO:0008150, GO:0006091, GO:0006790, GO:0009056, GO:0048856, GO:0043167, GO:0009058, GO:0043226, GO:0005575, GO:0000003, GO:0003674, GO:0005622, GO:0006950, GO:0044281, GO:0005623, GO:0005777, GO:0005975, GO:0016491, GO:0005737, GO:0005739, GO:0006629, GO:0051186, GO:0005829, GO:0034641	carbohydrate metabolic process, catabolic process, cofactor metabolic process, biological_process, cytosol, organelle, peroxisome, cellular_component, cell, molecular_function, mitochondrion, cytoplasm, ion binding, cellular nitrogen compound metabolic process, generation of precursor metabolites and energy, biosynthetic process, response to stress, small molecule metabolic process, lipid metabol…	46.6445	92.51	18.36	18.36	56.6905	0.0116188	0.29155	0.0957202	2.4019	7	7	9	Infinity	100	Confident
C01R02	Q8K3J1	NADH dehydrogenase [ubiquinone] iron-sulfur protein 8, mitochondrial (NDUS8_MOUSE)	ENSMUSG00000059734	Ndufs8	19	GO:0008150, GO:0065003, GO:0006461, GO:0022607, GO:0043167, GO:0043234, GO:0043226, GO:0005575, GO:0003674, GO:0005622, GO:0006950, GO:0007005, GO:0005623, GO:0016491, GO:0005737, GO:0005739	mitochondrion organization, biological_process, cellular component assembly, organelle, macromolecular complex assembly, protein complex, cellular_component, cell, molecular_function, mitochondrion, cytoplasm, ion binding, response to stress, protein complex assembly, oxidoreductase activity, intracellular	24.0228	83.02	4.25	4.25	27.7228	0.00568182	0.0926009	0.046809	0.762882	2	2	2	30.1226	92.3996	Doubtful
C01R02	Q505D7	Optic atrophy 3 protein homolog (OPA3_MOUSE)	ENSMUSG00000052214	Opa3	7	GO:0008150, GO:0048856, GO:0043226, GO:0005575, GO:0005622, GO:0003674, GO:0040007, GO:0007005, GO:0005623, GO:0005737, GO:0006629, GO:0005739, GO:0050877	mitochondrion organization, nervous system process, biological_process, organelle, cellular_component, cell, molecular_function, mitochondrion, cytoplasm, lipid metabolic process, growth, anatomical structure development, intracellular	20.0973	78.21	6.7	6.7	104.554	0.0214286	0.115884	0.176537	0.954697	3	3	5	Infinity	100	Doubtful
C01R02	Q9JK48	Endophilin-B1 (SHLB1_MOUSE)	ENSMUSG00000037062	Sh3glb1	3	GO:0016746, GO:0009056, GO:0006461, GO:0022607, GO:0043167, GO:0005794, GO:0008289, GO:0009058, GO:0043226, GO:0005575, GO:0005773, GO:0003674, GO:0051301, GO:0005623, GO:0007009, GO:0008219, GO:0006914, GO:0005829, GO:0031410, GO:0008150, GO:0061024, GO:0065003, GO:0007165, GO:0005783, GO:0006457, GO:0006810, GO:0005622, GO:0006950, GO:0007005, GO:0007049, GO:0006605, GO:0005737, GO:0005739, GO:…	cellular component assembly, transferase activity, transferring acyl groups, cellular_component, cell, molecular_function, cytoplasm, plasma membrane organization, ion binding, biosynthetic process, membrane organization, protein targeting, protein folding, mitochondrion organization, catabolic process, autophagy, vacuole, cell death, cytosol, biological_process, signal transduction, cell cycle, …	40.8298	67.12	4.11	4.11	17.7426	0.00363636	0.053725	0.0299578	0.442607	1	1	1	29.6332	90.1758	Doubtful
C01R02	O55125	Protein NipSnap homolog 1 (NIPS1_MOUSE)	ENSMUSG00000034285	Nipsnap1	11	GO:0005623, GO:0008150, GO:0005737, GO:0005739, GO:0043226, GO:0005575, GO:0050877, GO:0005886, GO:0005622, GO:0003674	cytoplasm, nervous system process, biological_process, plasma membrane, organelle, cell, cellular_component, intracellular, mitochondrion, molecular_function	33.342	79.93	14.44	14.44	44.3825	0.00909624	0.258925	0.0749384	2.13313	6	6	8	124.078	97.5031	Confident
C01R02	Q9JKC6	Cell cycle exit and neuronal differentiation protein 1 (CEND_MOUSE)	ENSMUSG00000060240	Cend1	7	GO:0008283, GO:0008150, GO:0040011, GO:0048856, GO:0048646, GO:0021700, GO:0043226, GO:0005575, GO:0005622, GO:0003674, GO:0048870, GO:0005623, GO:0005737, GO:0005739, GO:0030154	cell differentiation, cell proliferation, biological_process, organelle, locomotion, anatomical structure formation involved in morphogenesis, cellular_component, cell, molecular_function, mitochondrion, developmental maturation, cell motility, cytoplasm, anatomical structure development, intracellular	14.9778	56.38	30.87	30.87	295.27	0.0605159	0.778279	0.498553	6.41177	6	6	14	Infinity	100	Confident
C01R02	P47738	Aldehyde dehydrogenase, mitochondrial (ALDH2_MOUSE)	ENSMUSG00000029455	Aldh2	5	GO:0044281, GO:0005623, GO:0008150, GO:0005737, GO:0016491, GO:0009056, GO:0005739, GO:0043226, GO:0005575, GO:0005622, GO:0003674	cytoplasm, catabolic process, biological_process, small molecule metabolic process, organelle, oxidoreductase activity, cell, cellular_component, intracellular, mitochondrion, molecular_function	56.5018	68.98	24.28	24.28	96.2228	0.019721	0.457593	0.162469	3.76983	10	10	20	Infinity	100	Confident
C01R02	Q61335	B-cell receptor-associated protein 31 (BAP31_MOUSE)	ENSMUSG00000002015	Bcap31	X	GO:0008150, GO:0009056, GO:0007165, GO:0005794, GO:0005783, GO:0043234, GO:0043226, GO:0005575, GO:0006810, GO:0000003, GO:0005622, GO:0003674, GO:0005886, GO:0006950, GO:0005811, GO:0005623, GO:0008219, GO:0016192, GO:0005737, GO:0042592, GO:0005739, GO:0031410	lipid droplet, catabolic process, cell death, biological_process, signal transduction, plasma membrane, organelle, transport, protein complex, cellular_component, cell, molecular_function, mitochondrion, cytoplasm, cytoplasmic vesicle, response to stress, golgi apparatus, homeostatic process, intracellular, endoplasmic reticulum, reproduction, vesicle-mediated transport	27.939	76.33	4.08	4.08	19.9151	0.00408163	0.0624678	0.0336261	0.514634	1	1	1	29.6332	90.1758	Doubtful
C01R02	Q9CWS0	N(G),N(G)-dimethylarginine dimethylaminohydrolase 1 (DDAH1_MOUSE)	ENSMUSG00000028194	Ddah1	3	GO:0016810, GO:0008283, GO:0008150, GO:0009056, GO:0048856, GO:0006464, GO:0043167, GO:0006520, GO:0048646, GO:0009058, GO:0043226, GO:0005575, GO:0003013, GO:0005622, GO:0006950, GO:0003674, GO:0044281, GO:0005623, GO:0005737, GO:0005739, GO:0034641	catabolic process, cellular amino acid metabolic process, cell proliferation, biological_process, organelle, anatomical structure formation involved in morphogenesis, hydrolase activity, acting on carbon-nitrogen (but not peptide) bonds, cellular_component, cell, molecular_function, mitochondrion, circulatory system process, cytoplasm, ion binding, cellular nitrogen compound metabolic process, bi…	31.3609	85.61	30.18	30.18	93.0643	0.0190736	0.747528	0.157136	6.15843	9	8	14	Infinity	100	Confident
C01R02	Q9D8S4	Oligoribonuclease, mitochondrial (ORN_MOUSE)	ENSMUSG00000032026	Rexo2	9	GO:0008150, GO:0005623, GO:0005634, GO:0005737, GO:0004518, GO:0005739, GO:0034641, GO:0043226, GO:0005730, GO:0005575, GO:0005622, GO:0003674	cytoplasm, nuclease activity, cellular nitrogen compound metabolic process, biological_process, organelle, nucleolus, nucleus, cell, cellular_component, intracellular, mitochondrion, molecular_function	26.7216	88.61	7.59	7.59	20.5874	0.00421941	0.070069	0.0347611	0.577255	2	2	4	32.6591	94.5885	Doubtful
C01R02	Q8K2B3	Succinate dehydrogenase [ubiquinone] flavoprotein subunit, mitochondrial (SDHA_MOUSE)	ENSMUSG00000021577	Sdha	13	GO:0008150, GO:0006091, GO:0043167, GO:0048856, GO:0043234, GO:0043226, GO:0005730, GO:0005575, GO:0003674, GO:0005622, GO:0044281, GO:0005634, GO:0005623, GO:0016491, GO:0005737, GO:0005739, GO:0034641	biological_process, organelle, nucleus, protein complex, cellular_component, cell, molecular_function, mitochondrion, cytoplasm, ion binding, cellular nitrogen compound metabolic process, generation of precursor metabolites and energy, small molecule metabolic process, nucleolus, oxidoreductase activity, anatomical structure development, intracellular	72.5392	77.11	18.22	16.42	59.3723	0.0121684	0.396135	0.100248	3.26352	10	10	23	Infinity	100	Confident
C01R02	Q11011	Puromycin-sensitive aminopeptidase (PSA_MOUSE)	ENSMUSG00000001441	Npepps	11	GO:0008150, GO:0009056, GO:0043167, GO:0008233, GO:0043226, GO:0006810, GO:0005575, GO:0007005, GO:0006950, GO:0005622, GO:0003674, GO:0006605, GO:0005634, GO:0005623, GO:0005737, GO:0005829, GO:0034641	mitochondrion organization, catabolic process, biological_process, cytosol, organelle, nucleus, peptidase activity, transport, cellular_component, cell, molecular_function, cytoplasm, ion binding, cellular nitrogen compound metabolic process, response to stress, protein targeting, intracellular	103.26	68.26	20.11	20.11	63.6397	0.013043	0.404004	0.107454	3.32834	17	17	42	Infinity	100	Confident
C01R02	P35700	Peroxiredoxin-1 (PRDX1_MOUSE)	ENSMUSG00000028691	Prdx1	4	GO:0008283, GO:0008150, GO:0009056, GO:0007165, GO:0006464, GO:0005576, GO:0043226, GO:0005575, GO:0006810, GO:0005622, GO:0006950, GO:0002376, GO:0003674, GO:0006605, GO:0006913, GO:0005623, GO:0005634, GO:0016491, GO:0005737, GO:0042592, GO:0005739, GO:0051186, GO:0005829	catabolic process, cofactor metabolic process, cell proliferation, biological_process, signal transduction, cytosol, organelle, extracellular region, nucleus, transport, cellular_component, cell, molecular_function, mitochondrion, cytoplasm, response to stress, protein targeting, nucleocytoplasmic transport, cellular protein modification process, immune system process, oxidoreductase activity, ho…	22.1624	100	37.19	37.19	119.733	0.0245394	1.22754	0.202165	10.113	8	6	15	Infinity	100	Confident
C01R02	Q2TPA8	Hydroxysteroid dehydrogenase-like protein 2 (HSDL2_MOUSE)	ENSMUSG00000028383	Hsdl2	4	GO:0005777, GO:0008150, GO:0005623, GO:0005737, GO:0016491, GO:0005739, GO:0043226, GO:0005575, GO:0003674, GO:0005622	cytoplasm, biological_process, organelle, peroxisome, oxidoreductase activity, cell, cellular_component, intracellular, mitochondrion, molecular_function	54.1739	80	4.29	4.29	16.3003	0.00334076	0.0964782	0.0275225	0.794825	2	2	2	48.9433	95.7027	Confident
C01R02	P17665	Cytochrome c oxidase subunit 7C, mitochondrial (COX7C_MOUSE)	ENSMUSG00000017778	Cox7c	13	GO:0008150, GO:0006091, GO:0055085, GO:0022857, GO:0043234, GO:0043226, GO:0006810, GO:0005575, GO:0003674, GO:0005622, GO:0044281, GO:0005623, GO:0005737, GO:0016491, GO:0005739, GO:0034641	biological_process, transmembrane transporter activity, organelle, transport, protein complex, cellular_component, cell, molecular_function, mitochondrion, cytoplasm, transmembrane transport, cellular nitrogen compound metabolic process, generation of precursor metabolites and energy, small molecule metabolic process, oxidoreductase activity, intracellular	7.32788	100	14.29	14.29	232.343	0.047619	0.258925	0.392304	2.13313	1	1	3	Infinity	100	Doubtful
C01R02	P16330	2',3'-cyclic-nucleotide 3'-phosphodiesterase (CN37_MOUSE)	ENSMUSG00000006782	Cnp	11	GO:0007010, GO:0009056, GO:0048856, GO:0043226, GO:0005576, GO:0005575, GO:0003674, GO:0005654, GO:0044281, GO:0005623, GO:0003723, GO:0005829, GO:0031410, GO:0034641, GO:0008150, GO:0061024, GO:0000902, GO:0007568, GO:0006810, GO:0005886, GO:0005622, GO:0007005, GO:0005634, GO:0005615, GO:0005856, GO:0005737, GO:0005739, GO:0030154, GO:0034655	nucleoplasm, cell differentiation, extracellular region, cellular_component, cell, rna binding, molecular_function, cytoplasm, cellular nitrogen compound metabolic process, membrane organization, cell morphogenesis, extracellular space, mitochondrion organization, catabolic process, nucleobase-containing compound catabolic process, cytoskeleton organization, cytosol, biological_process, plasma me…	47.0935	85.24	37.86	37.86	234.289	0.0480179	0.795714	0.39559	6.55541	18	18	41	Infinity	100	Confident
C01R02	Q8BH95	Enoyl-CoA hydratase, mitochondrial (ECHM_MOUSE)	ENSMUSG00000025465	Echs1	7	GO:0044281, GO:0005623, GO:0008150, GO:0009056, GO:0005737, GO:0006629, GO:0005739, GO:0016829, GO:0043226, GO:0005575, GO:0005622, GO:0003674	cytoplasm, catabolic process, biological_process, small molecule metabolic process, organelle, lipid metabolic process, lyase activity, cell, cellular_component, intracellular, mitochondrion, molecular_function	31.4542	77.24	11.72	11.72	134.466	0.0275591	0.136464	0.227042	1.12424	2	2	9	Infinity	100	Confident
C01R02	P35486	Pyruvate dehydrogenase E1 component subunit alpha, somatic form, mitochondrial (ODPA_MOUSE)	ENSMUSG00000031299	Pdha1	X	GO:0008150, GO:0006091, GO:0006790, GO:0009058, GO:0005730, GO:0043226, GO:0005575, GO:0003674, GO:0005622, GO:0044281, GO:0005634, GO:0005623, GO:0005975, GO:0016491, GO:0005737, GO:0051186, GO:0005739, GO:0034641	carbohydrate metabolic process, cofactor metabolic process, biological_process, organelle, nucleus, cellular_component, cell, molecular_function, mitochondrion, cytoplasm, cellular nitrogen compound metabolic process, generation of precursor metabolites and energy, biosynthetic process, small molecule metabolic process, sulfur compound metabolic process, nucleolus, oxidoreductase activity, intrac…	43.2036	75.9	20.26	20.26	81.8384	0.0167729	0.435036	0.138182	3.58399	8	8	13	Infinity	100	Confident
C01R02	Q61171	Peroxiredoxin-2 (PRDX2_MOUSE)	ENSMUSG00000005161	Prdx2	8	GO:0008283, GO:0008150, GO:0007165, GO:0009056, GO:0048856, GO:0006464, GO:0007155, GO:0009058, GO:0043226, GO:0005575, GO:0005622, GO:0003674, GO:0002376, GO:0006950, GO:0005623, GO:0008219, GO:0016491, GO:0005737, GO:0042592, GO:0005739, GO:0051186, GO:0030154, GO:0005829, GO:0034641	catabolic process, cell differentiation, cofactor metabolic process, cell proliferation, cell death, biological_process, signal transduction, cytosol, organelle, cellular_component, cell, molecular_function, mitochondrion, cytoplasm, cellular nitrogen compound metabolic process, biosynthetic process, response to stress, cell adhesion, cellular protein modification process, immune system process, …	21.7651	67.68	35.86	35.86	153.29	0.031417	1.63665	0.258825	13.4834	8	8	16	Infinity	100	Confident
C01R02	Q62465	Synaptic vesicle membrane protein VAT-1 homolog (VAT1_MOUSE)	ENSMUSG00000034993	Vat1	11	GO:0061024, GO:0008150, GO:0043167, GO:0048856, GO:0043226, GO:0005575, GO:0003674, GO:0005622, GO:0007005, GO:0005623, GO:0005737, GO:0016491, GO:0005739	mitochondrion organization, biological_process, organelle, cellular_component, cell, molecular_function, mitochondrion, cytoplasm, ion binding, membrane organization, oxidoreductase activity, anatomical structure development, intracellular	43.069	62.07	18.47	18.47	120.518	0.0247002	0.417474	0.20349	3.43931	5	5	13	Infinity	100	Confident
C01R02	Q9D6R2	Isocitrate dehydrogenase [NAD] subunit alpha, mitochondrial (IDH3A_MOUSE)	ENSMUSG00000032279	Idh3a	9	GO:0044281, GO:0008150, GO:0005623, GO:0006091, GO:0005737, GO:0016491, GO:0005739, GO:0043167, GO:0043226, GO:0005575, GO:0005622, GO:0003674	cytoplasm, ion binding, generation of precursor metabolites and energy, biological_process, small molecule metabolic process, organelle, oxidoreductase activity, cell, cellular_component, intracellular, mitochondrion, molecular_function	39.6131	72.68	36.07	36.07	146.358	0.0299962	1.15443	0.247121	9.51068	13	13	32	Infinity	100	Confident
C01R02	O08553	Dihydropyrimidinase-related protein 2 (DPYL2_MOUSE)	ENSMUSG00000022048	Dpysl2	14	GO:0016810, GO:0008150, GO:0007010, GO:0040011, GO:0000902, GO:0048856, GO:0043226, GO:0006810, GO:0005575, GO:0005886, GO:0040007, GO:0005622, GO:0003674, GO:0005623, GO:0005856, GO:0016192, GO:0005737, GO:0005739, GO:0030154, GO:0005829, GO:0008092, GO:0019899	enzyme binding, cell differentiation, cytoskeleton organization, biological_process, plasma membrane, cytoskeleton, cytosol, organelle, locomotion, hydrolase activity, acting on carbon-nitrogen (but not peptide) bonds, transport, cellular_component, cell, molecular_function, mitochondrion, cytoplasm, cell morphogenesis, growth, cytoskeletal protein binding, anatomical structure development, intra…	62.2386	82.34	61.89	61.89	139.913	0.0286754	1.69795	0.236239	13.9884	27	21	64	Infinity	100	Confident
C01R02	O88696	ATP-dependent Clp protease proteolytic subunit, mitochondrial (CLPP_MOUSE)	ENSMUSG00000002660	Clpp	17	GO:0008150, GO:0065003, GO:0006461, GO:0009056, GO:0022607, GO:0043234, GO:0008233, GO:0043226, GO:0005575, GO:0003674, GO:0005622, GO:0005623, GO:0005737, GO:0005739	catabolic process, biological_process, cellular component assembly, organelle, peptidase activity, macromolecular complex assembly, protein complex, cellular_component, cell, molecular_function, mitochondrion, cytoplasm, protein complex assembly, intracellular	29.7813	69.12	5.51	5.51	22.4848	0.00460829	0.0926009	0.0379649	0.762882	3	3	3	25.2224	88.2411	Doubtful
C01R02	P12787	Cytochrome c oxidase subunit 5A, mitochondrial (COX5A_MOUSE)	ENSMUSG00000000088	Cox5a	9	GO:0008150, GO:0006091, GO:0055085, GO:0022857, GO:0043167, GO:0043234, GO:0043226, GO:0005575, GO:0006810, GO:0003674, GO:0005622, GO:0044281, GO:0005623, GO:0005737, GO:0016491, GO:0005739, GO:0034641	biological_process, transmembrane transporter activity, organelle, transport, protein complex, cellular_component, cell, molecular_function, mitochondrion, cytoplasm, transmembrane transport, ion binding, cellular nitrogen compound metabolic process, generation of precursor metabolites and energy, small molecule metabolic process, oxidoreductase activity, intracellular	16.0913	80.14	46.58	46.58	115.296	0.0236301	1.25393	0.194674	10.3304	6	6	10	Infinity	100	Confident
C01R02	P48771	Cytochrome c oxidase subunit 7A2, mitochondrial (CX7A2_MOUSE)	ENSMUSG00000032330	Cox7a2	9	GO:0008150, GO:0006091, GO:0055085, GO:0022857, GO:0043226, GO:0006810, GO:0005575, GO:0003674, GO:0005622, GO:0005623, GO:0005737, GO:0016491, GO:0005739	biological_process, transmembrane transporter activity, organelle, transport, cellular_component, cell, molecular_function, mitochondrion, cytoplasm, transmembrane transport, generation of precursor metabolites and energy, oxidoreductase activity, intracellular	9.28496	100	27.71	27.71	195.952	0.0401606	0.701254	0.330859	5.77721	3	3	8	Infinity	100	Confident
C01R02	Q8K1M6	Dynamin-1-like protein (DNM1L_MOUSE)	ENSMUSG00000022789	Dnm1l	16	GO:0009056, GO:0006461, GO:0022607, GO:0048856, GO:0043167, GO:0008289, GO:0005794, GO:0043226, GO:0003013, GO:0005575, GO:0003674, GO:0044281, GO:0005623, GO:0016192, GO:0008219, GO:0003924, GO:0006914, GO:0031410, GO:0005829, GO:0034641, GO:0008150, GO:0061024, GO:0065003, GO:0007165, GO:0006810, GO:0007005, GO:0005622, GO:0005777, GO:0005856, GO:0005737, GO:0005739, GO:0008092, GO:0019899	cellular component assembly, gtpase activity, cellular_component, cell, molecular_function, cytoplasm, ion binding, cellular nitrogen compound metabolic process, membrane organization, cytoskeletal protein binding, enzyme binding, mitochondrion organization, catabolic process, autophagy, cell death, cytosol, biological_process, signal transduction, cytoskeleton, organelle, peroxisome, macromolecu…	82.6065	92.72	22.78	22.78	45.5162	0.00932861	0.284386	0.0768527	2.34288	15	15	29	Infinity	100	Confident
C01R02	P11499	Heat shock protein HSP 90-beta (HS90B_MOUSE)	ENSMUSG00000023944	Hsp90ab1	17	GO:0006461, GO:0009056, GO:0022607, GO:0048856, GO:0006464, GO:0043167, GO:0009058, GO:0043226, GO:0005576, GO:0005575, GO:0005773, GO:0003674, GO:0006913, GO:0005623, GO:0003723, GO:0008219, GO:0031410, GO:0005829, GO:0034641, GO:0008150, GO:0065003, GO:0007165, GO:0000902, GO:0022618, GO:0051082, GO:0043234, GO:0006259, GO:0044403, GO:0006457, GO:0006810, GO:0002376, GO:0000003, GO:0005622, GO:…	cell differentiation, cellular component assembly, extracellular region, cellular_component, cell, rna binding, protein complex, molecular_function, cytoplasm, ion binding, cellular nitrogen compound metabolic process, biosynthetic process, enzyme regulator activity, cell morphogenesis, protein targeting, protein folding, immune system process, homeostatic process, cytoskeletal protein binding, u…	83.2291	82.46	9.81	6.49	35.7079	0.00731838	0.13921	0.0602916	1.14687	6	2	12	39.7167	95.5121	Confident
C01R02	Q922Q1	Mitochondrial amidoxime reducing component 2 (MARC2_MOUSE)	ENSMUSG00000073481	Marc2	1	GO:0044281, GO:0005623, GO:0008150, GO:0005777, GO:0016491, GO:0005737, GO:0005739, GO:0043167, GO:0043226, GO:0005575, GO:0005622, GO:0003674	cytoplasm, ion binding, biological_process, small molecule metabolic process, organelle, peroxisome, oxidoreductase activity, cell, cellular_component, intracellular, mitochondrion, molecular_function	38.1696	71.89	2.96	2.96	72.0178	0.0147601	0.0513302	0.1216	0.422878	1	1	4	Infinity	100	Doubtful
C01R02	O70591	Prefoldin subunit 2 (PFD2_MOUSE)	ENSMUSG00000006412	Pfdn2	1	GO:0008150, GO:0007010, GO:0051082, GO:0043234, GO:0043226, GO:0006457, GO:0005575, GO:0005622, GO:0003674, GO:0005623, GO:0005634, GO:0005737, GO:0005739, GO:0005829	cytoskeleton organization, biological_process, cytosol, organelle, nucleus, protein complex, cellular_component, cell, molecular_function, mitochondrion, cytoplasm, protein folding, intracellular, unfolded protein binding	16.5236	100	16.88	16.88	47.5248	0.00974026	0.221677	0.080244	1.82626	2	2	2	38.8815	95.0801	Confident
C01R02	P15105	Glutamine synthetase (GLNA_MOUSE)	ENSMUSG00000026473	Glul	1	GO:0008283, GO:0008150, GO:0065003, GO:0006461, GO:0022607, GO:0007267, GO:0016829, GO:0043167, GO:0006520, GO:0005783, GO:0009058, GO:0043226, GO:0005575, GO:0006810, GO:0003674, GO:0005622, GO:0006950, GO:0044281, GO:0005623, GO:0005737, GO:0005739, GO:0005829, GO:0016874	cellular amino acid metabolic process, cell proliferation, biological_process, cell-cell signaling, cytosol, cellular component assembly, organelle, macromolecular complex assembly, transport, cellular_component, cell, molecular_function, mitochondrion, cytoplasm, ion binding, biosynthetic process, response to stress, small molecule metabolic process, lyase activity, ligase activity, protein comp…	42.0923	68.9	20.91	20.91	190.033	0.0389476	0.550516	0.320865	4.53536	8	8	21	Infinity	100	Confident
C01R02	P29758	Ornithine aminotransferase, mitochondrial (OAT_MOUSE)	ENSMUSG00000030934	Oat	7	GO:0008150, GO:0065003, GO:0006461, GO:0022607, GO:0043167, GO:0006520, GO:0009058, GO:0043226, GO:0005575, GO:0005622, GO:0003674, GO:0005654, GO:0044281, GO:0005623, GO:0005634, GO:0005737, GO:0005739	nucleoplasm, cellular amino acid metabolic process, biological_process, cellular component assembly, organelle, nucleus, macromolecular complex assembly, cellular_component, cell, molecular_function, mitochondrion, cytoplasm, ion binding, biosynthetic process, small molecule metabolic process, protein complex assembly, intracellular	48.3239	75.17	12.53	8.88	49.2849	0.010101	0.216484	0.083216	1.78348	5	5	8	Infinity	100	Confident
C01R02	Q8R4N0	Citrate lyase subunit beta-like protein, mitochondrial (CLYBL_MOUSE)	ENSMUSG00000025545	Clybl	14	GO:0008150, GO:0016746, GO:0065003, GO:0006461, GO:0022607, GO:0043167, GO:0016829, GO:0043226, GO:0005575, GO:0005622, GO:0003674, GO:0044281, GO:0005623, GO:0005737, GO:0051186, GO:0005739	cofactor metabolic process, biological_process, cellular component assembly, organelle, transferase activity, transferring acyl groups, macromolecular complex assembly, cellular_component, cell, molecular_function, mitochondrion, cytoplasm, ion binding, small molecule metabolic process, lyase activity, protein complex assembly, intracellular	37.5248	100	3.55	3.55	14.4355	0.00295858	0.0525003	0.0243739	0.432518	1	1	1	29.6332	90.1758	Doubtful
C01R02	P28474	Alcohol dehydrogenase class-3 (ADHX_MOUSE)	ENSMUSG00000028138	Adh5	3	GO:0008150, GO:0009056, GO:0043167, GO:0006464, GO:0008289, GO:0043226, GO:0005575, GO:0003013, GO:0006950, GO:0005622, GO:0003674, GO:0044281, GO:0005623, GO:0005737, GO:0016491, GO:0006629, GO:0005739	catabolic process, biological_process, organelle, cellular_component, cell, lipid binding, molecular_function, mitochondrion, circulatory system process, cytoplasm, ion binding, response to stress, small molecule metabolic process, lipid metabolic process, cellular protein modification process, oxidoreductase activity, intracellular	39.5221	73.26	8.02	8.02	36.9637	0.00757576	0.128838	0.062412	1.06142	3	3	5	Infinity	100	Confident
C01R02	Q61035	Histidine--tRNA ligase, cytoplasmic (SYHC_MOUSE)	ENSMUSG00000001380	Hars	18	GO:0008150, GO:0043167, GO:0006520, GO:0006399, GO:0009058, GO:0043226, GO:0005575, GO:0005622, GO:0003674, GO:0006412, GO:0044281, GO:0005623, GO:0005737, GO:0005739, GO:0005829, GO:0034641, GO:0016874	trna metabolic process, cellular amino acid metabolic process, biological_process, cytosol, organelle, cellular_component, cell, molecular_function, mitochondrion, cytoplasm, ion binding, cellular nitrogen compound metabolic process, biosynthetic process, small molecule metabolic process, translation, ligase activity, intracellular	57.3961	92.93	2.55	2.55	10.3155	0.00211416	0.0307608	0.0174173	0.253419	1	1	1	29.6332	90.1758	Doubtful
C01R02	P17710	Hexokinase-1 (HXK1_MOUSE)	ENSMUSG00000037012	Hk1	10	GO:0008150, GO:0006091, GO:0009056, GO:0043167, GO:0043226, GO:0006810, GO:0005575, GO:0003674, GO:0002376, GO:0005622, GO:0044281, GO:0005623, GO:0005975, GO:0005737, GO:0042592, GO:0005739, GO:0051186, GO:0005929, GO:0005829, GO:0034641, GO:0016301	carbohydrate metabolic process, catabolic process, cofactor metabolic process, biological_process, cytosol, organelle, transport, cellular_component, cell, molecular_function, mitochondrion, cytoplasm, cilium, ion binding, cellular nitrogen compound metabolic process, generation of precursor metabolites and energy, kinase activity, small molecule metabolic process, immune system process, homeosta…	108.234	79.67	25.77	25.77	57.4545	0.0117754	0.561523	0.0970102	4.62604	26	25	53	Infinity	100	Confident
C01R02	P58281	Dynamin-like 120 kDa protein, mitochondrial (OPA1_MOUSE)	ENSMUSG00000038084	Opa1	16	GO:0009790, GO:0006461, GO:0022607, GO:0048856, GO:0043167, GO:0008289, GO:0043226, GO:0005575, GO:0003674, GO:0005654, GO:0044281, GO:0005623, GO:0008219, GO:0003924, GO:0005829, GO:0034641, GO:0050877, GO:0061024, GO:0008150, GO:0065003, GO:0007165, GO:0048646, GO:0007568, GO:0005622, GO:0006950, GO:0007005, GO:0005634, GO:0005737, GO:0005739, GO:0008092	nucleoplasm, cellular component assembly, gtpase activity, anatomical structure formation involved in morphogenesis, embryo development, cellular_component, cell, molecular_function, cytoplasm, ion binding, cellular nitrogen compound metabolic process, membrane organization, cytoskeletal protein binding, mitochondrion organization, nervous system process, cell death, cytosol, biological_process, …	111.27	94.06	1.04	1.04	5.08251	0.00104167	0.0162323	0.00858165	0.133728	3	3	3	33.0995	94.5701	Doubtful
C01R02	Q6GQS1	Calcium-binding mitochondrial carrier protein SCaMC-3 (SCMC3_MOUSE)	ENSMUSG00000046329	Slc25a23	17	GO:0008150, GO:0006091, GO:0055085, GO:0022857, GO:0043167, GO:0043226, GO:0006810, GO:0005575, GO:0005622, GO:0003674, GO:0044281, GO:0005623, GO:0005737, GO:0042592, GO:0005739, GO:0034641	biological_process, transmembrane transporter activity, organelle, transport, cellular_component, cell, molecular_function, mitochondrion, cytoplasm, transmembrane transport, ion binding, cellular nitrogen compound metabolic process, generation of precursor metabolites and energy, small molecule metabolic process, homeostatic process, intracellular	52.464	91.65	2.78	2.78	11.4	0.00233645	0.0435626	0.0192486	0.358886	1	1	1	29.6332	90.1758	Doubtful
C01R02	P97823	Acyl-protein thioesterase 1 (LYPA1_MOUSE)	ENSMUSG00000025903	Lypla1	1	GO:0008150, GO:0009056, GO:0006464, GO:0043226, GO:0006810, GO:0005575, GO:0005622, GO:0003674, GO:0044281, GO:0005623, GO:0016192, GO:0005737, GO:0005739, GO:0006629, GO:0005829	catabolic process, biological_process, cytosol, organelle, transport, cellular_component, cell, molecular_function, mitochondrion, cytoplasm, small molecule metabolic process, lipid metabolic process, cellular protein modification process, intracellular, vesicle-mediated transport	24.6714	60	5.65	5.65	51.3601	0.0105263	0.145048	0.0867199	1.19496	1	1	2	Infinity	100	Doubtful
C01R02	O08599	Syntaxin-binding protein 1 (STXB1_MOUSE)	ENSMUSG00000026797	Stxbp1	2	GO:0006461, GO:0022607, GO:0048856, GO:0007155, GO:0043226, GO:0005575, GO:0003674, GO:0005654, GO:0005623, GO:0007009, GO:0016192, GO:0008219, GO:0031410, GO:0005829, GO:0061024, GO:0008150, GO:0065003, GO:0000902, GO:0007267, GO:0021700, GO:0006810, GO:0002376, GO:0006950, GO:0005622, GO:0005886, GO:0000003, GO:0005634, GO:0005856, GO:0005737, GO:0005739, GO:0030154, GO:0019899	nucleoplasm, cell differentiation, cell-cell signaling, cellular component assembly, cellular_component, cell, molecular_function, developmental maturation, cytoplasm, plasma membrane organization, cell adhesion, membrane organization, cell morphogenesis, immune system process, enzyme binding, cell death, cytosol, biological_process, plasma membrane, cytoskeleton, organelle, nucleus, macromolecul…	67.5259	84.01	47.81	47.81	99.3498	0.0203619	0.922873	0.167749	7.60299	26	26	60	Infinity	100	Confident
C01R02	Q9JHI5	Isovaleryl-CoA dehydrogenase, mitochondrial (IVD_MOUSE)	ENSMUSG00000027332	Ivd	2	GO:0008150, GO:0009056, GO:0043167, GO:0006520, GO:0043226, GO:0005575, GO:0005622, GO:0003674, GO:0005654, GO:0044281, GO:0005634, GO:0005623, GO:0016491, GO:0005737, GO:0006629, GO:0005739	catabolic process, nucleoplasm, cellular amino acid metabolic process, biological_process, organelle, nucleus, cellular_component, cell, molecular_function, mitochondrion, cytoplasm, ion binding, small molecule metabolic process, lipid metabolic process, oxidoreductase activity, intracellular	46.2959	83.02	4.95	4.95	34.6535	0.00710227	0.102943	0.0585113	0.848087	4	4	6	Infinity	100	Confident
C01R02	D3Z7P3	Glutaminase kidney isoform, mitochondrial (GLSK_MOUSE)	ENSMUSG00000026103	Gls	1	GO:0016810, GO:0008150, GO:0065003, GO:0006461, GO:0009056, GO:0022607, GO:0007267, GO:0006520, GO:0009058, GO:0043226, GO:0005575, GO:0005622, GO:0003674, GO:0044281, GO:0005623, GO:0005737, GO:0005739, GO:0005829, GO:0050877	catabolic process, nervous system process, cellular amino acid metabolic process, biological_process, cell-cell signaling, cytosol, cellular component assembly, organelle, hydrolase activity, acting on carbon-nitrogen (but not peptide) bonds, macromolecular complex assembly, cellular_component, cell, molecular_function, mitochondrion, cytoplasm, biosynthetic process, small molecule metabolic proc…	73.9162	77.45	9.64	9.64	35.6667	0.00730994	0.138513	0.0602221	1.14112	8	8	11	Infinity	100	Confident
C01R02	P97807	Fumarate hydratase, mitochondrial (FUMH_MOUSE)		Fh		GO:0008150, GO:0006091, GO:0016829, GO:0043234, GO:0043226, GO:0005575, GO:0005622, GO:0003674, GO:0044281, GO:0005623, GO:0005737, GO:0042592, GO:0005739	biological_process, organelle, protein complex, cellular_component, cell, molecular_function, mitochondrion, cytoplasm, generation of precursor metabolites and energy, small molecule metabolic process, lyase activity, homeostatic process, intracellular	54.3221	75.15	40.43	40.43	72.4359	0.0148458	0.819701	0.122306	6.75301	14	14	27	Infinity	100	Confident
C01R02	Q9D6J6	NADH dehydrogenase [ubiquinone] flavoprotein 2, mitochondrial (NDUV2_MOUSE)	ENSMUSG00000024099	Ndufv2	17	GO:0008150, GO:0006091, GO:0048856, GO:0043167, GO:0043234, GO:0043226, GO:0005575, GO:0005622, GO:0003674, GO:0044281, GO:0005623, GO:0005737, GO:0016491, GO:0005739, GO:0034641	biological_process, organelle, protein complex, cellular_component, cell, molecular_function, mitochondrion, cytoplasm, ion binding, cellular nitrogen compound metabolic process, generation of precursor metabolites and energy, small molecule metabolic process, oxidoreductase activity, anatomical structure development, intracellular	27.2679	87.1	16.53	12.1	75.2964	0.0154321	0.304321	0.127136	2.50712	3	3	6	Infinity	100	Confident
C01R02	P60521	Gamma-aminobutyric acid receptor-associated protein-like 2 (GBRL2_MOUSE)	ENSMUSG00000031950	Gabarapl2	8	GO:0008150, GO:0009056, GO:0022607, GO:0005794, GO:0043226, GO:0005773, GO:0005575, GO:0006810, GO:0007005, GO:0005622, GO:0003674, GO:0006950, GO:0005623, GO:0016192, GO:0005737, GO:0006914, GO:0031410, GO:0005829, GO:0019899	enzyme binding, mitochondrion organization, catabolic process, autophagy, vacuole, biological_process, cytosol, cellular component assembly, organelle, transport, cellular_component, cell, molecular_function, cytoplasm, cytoplasmic vesicle, response to stress, golgi apparatus, intracellular, vesicle-mediated transport	13.6581	100	6.84	6.84	41.7026	0.00854701	0.128838	0.0704136	1.06142	2	2	2	33.8776	94.7668	Doubtful
C01R02	Q8BH59	Calcium-binding mitochondrial carrier protein Aralar1 (CMC1_MOUSE)	ENSMUSG00000027010	Slc25a12	2	GO:0008150, GO:0006091, GO:0055085, GO:0022857, GO:0043167, GO:0043226, GO:0006810, GO:0005575, GO:0005622, GO:0003674, GO:0005623, GO:0005737, GO:0005739	biological_process, transmembrane transporter activity, organelle, transport, cellular_component, cell, molecular_function, mitochondrion, cytoplasm, transmembrane transport, ion binding, generation of precursor metabolites and energy, intracellular	74.5227	80.21	55.98	51.55	61.61	0.012627	1.66975	0.104027	13.756	29	29	68	Infinity	100	Confident
C01R02	Q62425	Cytochrome c oxidase subunit NDUFA4 (NDUA4_MOUSE)	ENSMUSG00000029632	Ndufa4	6	GO:0008150, GO:0006091, GO:0055085, GO:0022857, GO:0043234, GO:0043226, GO:0006810, GO:0005575, GO:0003674, GO:0005622, GO:0005623, GO:0005737, GO:0016491, GO:0005739	biological_process, transmembrane transporter activity, organelle, transport, protein complex, cellular_component, cell, molecular_function, mitochondrion, cytoplasm, transmembrane transport, generation of precursor metabolites and energy, oxidoreductase activity, intracellular	9.32087	100	35.37	35.37	461.145	0.0945122	1.15443	0.778628	9.51068	4	4	12	Infinity	100	Confident
C01R02	Q68FD5	Clathrin heavy chain 1 (CLH1_MOUSE)	ENSMUSG00000047126	Cltc	11	GO:0007010, GO:0006461, GO:0009056, GO:0022607, GO:0005198, GO:0005794, GO:0005694, GO:0009058, GO:0005576, GO:0043226, GO:0005575, GO:0005773, GO:0003674, GO:0000278, GO:0051301, GO:0044281, GO:0005623, GO:0007009, GO:0005768, GO:0003723, GO:0016192, GO:0006914, GO:0140014, GO:0031410, GO:0005829, GO:0008150, GO:0061024, GO:0065003, GO:0043234, GO:0006810, GO:0005886, GO:0007049, GO:0005622, GO:…	carbohydrate metabolic process, cellular component assembly, extracellular region, mitotic cell cycle, cellular_component, cell, rna binding, protein complex, molecular_function, cytoplasm, plasma membrane organization, endosome, biosynthetic process, membrane organization, mitotic nuclear division, enzyme binding, catabolic process, autophagy, cytoskeleton organization, vacuole, cytosol, biologi…	191.435	78.93	12.6	12.6	24.9216	0.00510772	0.223825	0.0420794	1.84396	19	19	32	Infinity	100	Confident
C01R02	Q9D6M3	Mitochondrial glutamate carrier 1 (GHC1_MOUSE)	ENSMUSG00000019082	Slc25a22	7	GO:0005623, GO:0008150, GO:0055085, GO:0022857, GO:0005737, GO:0005739, GO:0043226, GO:0005575, GO:0006810, GO:0005622, GO:0003674	cytoplasm, transmembrane transport, biological_process, transmembrane transporter activity, organelle, transport, cell, cellular_component, intracellular, mitochondrion, molecular_function	34.6482	62.85	12.38	12.38	57.5886	0.0118029	0.333521	0.0972365	2.74768	4	3	7	Infinity	100	Confident
C01R02	P39053	Dynamin-1 (DYN1_MOUSE)	ENSMUSG00000026825	Dnm1	2	GO:0006461, GO:0022607, GO:0043167, GO:0005794, GO:0043226, GO:0005575, GO:0003674, GO:0005654, GO:0005623, GO:0016192, GO:0003924, GO:0031410, GO:0050877, GO:0061024, GO:0008150, GO:0065003, GO:0007165, GO:0007267, GO:0043234, GO:0006810, GO:0007005, GO:0005622, GO:0005886, GO:0005634, GO:0005856, GO:0005737, GO:0005739, GO:0008092, GO:0019899	nucleoplasm, cell-cell signaling, cellular component assembly, gtpase activity, cellular_component, cell, protein complex, molecular_function, cytoplasm, ion binding, membrane organization, cytoskeletal protein binding, enzyme binding, mitochondrion organization, nervous system process, biological_process, signal transduction, plasma membrane, cytoskeleton, organelle, nucleus, macromolecular comp…	97.7413	80.74	17.99	17.99	34.2105	0.00701148	0.300275	0.0577633	2.47378	16	14	26	Infinity	100	Confident
C01R02	Q791V5	Mitochondrial carrier homolog 2 (MTCH2_MOUSE)	ENSMUSG00000111714	Mtch2	CHR_MG191_PATCH	GO:0008150, GO:0061024, GO:0006091, GO:0040011, GO:0009056, GO:0007165, GO:0043226, GO:0005575, GO:0006810, GO:0003674, GO:0007005, GO:0005622, GO:0006950, GO:0048870, GO:0044281, GO:0005975, GO:0005623, GO:0008219, GO:0005737, GO:0042592, GO:0051186, GO:0005739, GO:0034641	carbohydrate metabolic process, mitochondrion organization, catabolic process, cofactor metabolic process, cell death, biological_process, signal transduction, organelle, locomotion, transport, cellular_component, cell, molecular_function, mitochondrion, cell motility, cytoplasm, cellular nitrogen compound metabolic process, generation of precursor metabolites and energy, response to stress, memb…	33.477	70.63	13.2	13.2	34.2001	0.00700935	0.202264	0.0577457	1.66633	3	3	3	53.4015	96.0094	Confident
C01R02	P37040	NADPH--cytochrome P450 reductase (NCPR_MOUSE)	ENSMUSG00000005514	Por	5	GO:0008283, GO:0009056, GO:0043167, GO:0048856, GO:0006464, GO:0009058, GO:0043226, GO:0005575, GO:0003674, GO:0044281, GO:0005623, GO:0008219, GO:0016491, GO:0034641, GO:0008150, GO:0006091, GO:0007165, GO:0005783, GO:0005622, GO:0040007, GO:0005737, GO:0006629, GO:0005739, GO:0030154, GO:0019899	cell differentiation, cellular_component, cell, molecular_function, cytoplasm, ion binding, cellular nitrogen compound metabolic process, biosynthetic process, enzyme binding, catabolic process, cell proliferation, cell death, biological_process, signal transduction, organelle, mitochondrion, generation of precursor metabolites and energy, small molecule metabolic process, lipid metabolic process…	76.9953	73.6	2.65	2.65	13.2347	0.00271248	0.0651169	0.0223464	0.536458	3	3	4	57.0673	96.1131	Confident
C01R02	P63328	Serine/threonine-protein phosphatase 2B catalytic subunit alpha isoform (PP2BA_MOUSE)	ENSMUSG00000028161	Ppp3ca	3	GO:0006464, GO:0043167, GO:0048856, GO:0009058, GO:0043226, GO:0005575, GO:0003674, GO:0000278, GO:0005654, GO:0006913, GO:0005623, GO:0016192, GO:0016791, GO:0005829, GO:0034641, GO:0008150, GO:0007165, GO:0000902, GO:0007267, GO:0006810, GO:0006950, GO:0005622, GO:0005886, GO:0007049, GO:0006412, GO:0005634, GO:0006605, GO:0005737, GO:0042592, GO:0005739, GO:0030154, GO:0019899	nucleoplasm, cell differentiation, cell-cell signaling, mitotic cell cycle, cellular_component, cell, molecular_function, cytoplasm, ion binding, cellular nitrogen compound metabolic process, biosynthetic process, cell morphogenesis, protein targeting, homeostatic process, enzyme binding, cytosol, biological_process, signal transduction, plasma membrane, cell cycle, organelle, nucleus, transport,…	58.6063	80.81	33.97	31.86	45.6664	0.00935939	0.908542	0.0771063	7.48492	18	10	26	Infinity	100	Confident
C01R02	Q91WS0	CDGSH iron-sulfur domain-containing protein 1 (CISD1_MOUSE)	ENSMUSG00000037710	Cisd1	10	GO:0008150, GO:0005623, GO:0006091, GO:0005737, GO:0005739, GO:0043167, GO:0043226, GO:0005575, GO:0003674, GO:0005622	cytoplasm, ion binding, generation of precursor metabolites and energy, biological_process, organelle, cell, cellular_component, intracellular, mitochondrion, molecular_function	12.0892	100	34.26	34.26	94.1205	0.0192901	0.668101	0.15892	5.50407	4	4	4	Infinity	100	Confident
C01R02	P53986	Monocarboxylate transporter 1 (MOT1_MOUSE)	ENSMUSG00000032902	Slc16a1	3	GO:0008150, GO:0055085, GO:0022857, GO:0007010, GO:0007267, GO:0043226, GO:0006810, GO:0005575, GO:0003674, GO:0005886, GO:0007049, GO:0005622, GO:0005623, GO:0005856, GO:0005815, GO:0005737, GO:0042592, GO:0005739, GO:0006629	cytoskeleton organization, biological_process, transmembrane transporter activity, cell-cell signaling, plasma membrane, cell cycle, cytoskeleton, organelle, transport, cellular_component, cell, molecular_function, mitochondrion, cytoplasm, transmembrane transport, microtubule organizing center, lipid metabolic process, homeostatic process, intracellular	53.2324	33.27	1.83	1.83	17.8726	0.003663	0.070069	0.0301772	0.577255	1	1	1	29.6332	90.1758	Doubtful
C01R02	Q8QZT1	Acetyl-CoA acetyltransferase, mitochondrial (THIL_MOUSE)	ENSMUSG00000032047	Acat1	9	GO:0016746, GO:0006461, GO:0009056, GO:0022607, GO:0016829, GO:0043167, GO:0048856, GO:0006520, GO:0009058, GO:0043226, GO:0005575, GO:0003674, GO:0044281, GO:0005623, GO:0051186, GO:0034641, GO:0016874, GO:0008150, GO:0065003, GO:0006790, GO:0005622, GO:0006950, GO:0005737, GO:0006629, GO:0005739, GO:0019899	cellular amino acid metabolic process, cellular component assembly, transferase activity, transferring acyl groups, cellular_component, cell, molecular_function, cytoplasm, ion binding, cellular nitrogen compound metabolic process, biosynthetic process, sulfur compound metabolic process, enzyme binding, catabolic process, cofactor metabolic process, biological_process, organelle, macromolecular c…	44.7873	77.12	25.71	23.82	47.6401	0.00976391	0.481603	0.0804388	3.96763	9	9	14	Infinity	100	Confident
C01R02	Q9WV98	Mitochondrial import inner membrane translocase subunit Tim9 (TIM9_MOUSE)	ENSMUSG00000021079	Timm9	12	GO:0008150, GO:0061024, GO:0055085, GO:0043167, GO:0008565, GO:0043234, GO:0043226, GO:0006810, GO:0005575, GO:0007005, GO:0005622, GO:0003674, GO:0006605, GO:0005623, GO:0005737, GO:0005739	mitochondrion organization, biological_process, organelle, protein transporter activity, transport, protein complex, cellular_component, cell, molecular_function, mitochondrion, cytoplasm, transmembrane transport, ion binding, membrane organization, protein targeting, intracellular	10.3372	100	16.85	16.85	54.8226	0.011236	0.232847	0.0925662	1.91828	3	3	3	25.5361	88.282	Doubtful
C01R02	Q8QZS1	3-hydroxyisobutyryl-CoA hydrolase, mitochondrial (HIBCH_MOUSE)	ENSMUSG00000041426	Hibch	1	GO:0044281, GO:0008150, GO:0005623, GO:0009056, GO:0005737, GO:0005739, GO:0006520, GO:0043226, GO:0005575, GO:0005622, GO:0003674	cytoplasm, catabolic process, cellular amino acid metabolic process, biological_process, small molecule metabolic process, organelle, cell, cellular_component, intracellular, mitochondrion, molecular_function	43.0102	90.13	2.6	2.6	14.0611	0.00288184	0.0513302	0.0237418	0.422878	3	3	3	34.5922	94.7608	Doubtful
C01R02	Q9EQH3	Vacuolar protein sorting-associated protein 35 (VPS35_MOUSE)	ENSMUSG00000031696	Vps35	8	GO:0040011, GO:0006461, GO:0009056, GO:0022607, GO:0048856, GO:0008565, GO:0007034, GO:0009058, GO:0043226, GO:0005575, GO:0005773, GO:0003674, GO:0005623, GO:0016192, GO:0005768, GO:0008219, GO:0005829, GO:0031410, GO:0051604, GO:0034641, GO:0061024, GO:0008150, GO:0065003, GO:0007165, GO:0007267, GO:0043234, GO:0006810, GO:0007005, GO:0005622, GO:0006950, GO:0005764, GO:0005856, GO:0005737, GO:…	protein maturation, cell-cell signaling, cellular component assembly, locomotion, cellular_component, cell, protein complex, molecular_function, cytoplasm, endosome, cellular nitrogen compound metabolic process, biosynthetic process, membrane organization, vacuolar transport, mitochondrion organization, catabolic process, vacuole, cell death, cytosol, biological_process, signal transduction, cyto…	91.6548	76.26	2.26	2.26	11.0389	0.00226244	0.053725	0.0186389	0.442607	2	2	2	23.3653	87.9684	Confident
C01R02	Q60597	2-oxoglutarate dehydrogenase, mitochondrial (ODO1_MOUSE)	ENSMUSG00000020456	Ogdh	11	GO:0008150, GO:0006091, GO:0006790, GO:0040011, GO:0009056, GO:0043167, GO:0006464, GO:0048856, GO:0043234, GO:0043226, GO:0005575, GO:0003674, GO:0005622, GO:0048870, GO:0044281, GO:0005634, GO:0005623, GO:0005975, GO:0016491, GO:0005737, GO:0005739, GO:0051186, GO:0030154, GO:0034641	carbohydrate metabolic process, catabolic process, cell differentiation, cofactor metabolic process, biological_process, organelle, locomotion, nucleus, protein complex, cellular_component, cell, molecular_function, mitochondrion, cell motility, cytoplasm, ion binding, cellular nitrogen compound metabolic process, generation of precursor metabolites and energy, small molecule metabolic process, s…	116.375	72.43	2.93	2.93	11.2802	0.0023119	0.0673378	0.0190463	0.554755	6	6	7	Infinity	100	Confident
C01R02	P04925	Major prion protein (PRIO_MOUSE)	ENSMUSG00000079037	Prnp	2	GO:0008283, GO:0006461, GO:0022607, GO:0043167, GO:0006464, GO:0005794, GO:0007155, GO:0009058, GO:0043226, GO:0005575, GO:0003674, GO:0005623, GO:0007009, GO:0008219, GO:0005829, GO:0034641, GO:0050877, GO:0061024, GO:0008150, GO:0055085, GO:0065003, GO:0007165, GO:0007267, GO:0005783, GO:0043234, GO:0007568, GO:0004871, GO:0006810, GO:0005622, GO:0005886, GO:0006950, GO:0002376, GO:0005635, GO:…	cell-cell signaling, cellular component assembly, cellular_component, cell, protein complex, molecular_function, cytoplasm, plasma membrane organization, ion binding, cellular nitrogen compound metabolic process, biosynthetic process, cell adhesion, membrane organization, protein targeting, immune system process, homeostatic process, cytoskeletal protein binding, enzyme binding, nervous system pr…	27.9595	51.18	8.27	8.27	46.0303	0.00943396	0.311134	0.0777206	2.56324	2	2	2	Infinity	100	Confident
C01R02	P56135	ATP synthase subunit f, mitochondrial (ATPK_MOUSE)	ENSMUSG00000038690	Atp5j2	5	GO:0016887, GO:0008150, GO:0043234, GO:0009058, GO:0043226, GO:0006810, GO:0005575, GO:0005622, GO:0003674, GO:0044281, GO:0005623, GO:0005737, GO:0005739, GO:0034641	biological_process, organelle, transport, protein complex, cellular_component, cell, atpase activity, molecular_function, mitochondrion, cytoplasm, cellular nitrogen compound metabolic process, biosynthetic process, small molecule metabolic process, intracellular	10.3374	100	26.14	26.14	203.3	0.0416667	0.467799	0.343266	3.85391	3	3	7	Infinity	100	Confident
C01R02	P70404	Isocitrate dehydrogenase [NAD] subunit gamma 1, mitochondrial (IDHG1_MOUSE)	ENSMUSG00000002010	Idh3g	X	GO:0008150, GO:0006091, GO:0043167, GO:0005730, GO:0043226, GO:0005575, GO:0003674, GO:0005622, GO:0005654, GO:0044281, GO:0005623, GO:0005634, GO:0005737, GO:0016491, GO:0005739	nucleoplasm, biological_process, organelle, nucleus, cellular_component, cell, molecular_function, mitochondrion, cytoplasm, ion binding, generation of precursor metabolites and energy, small molecule metabolic process, nucleolus, oxidoreductase activity, intracellular	42.7582	73.28	18.32	18.32	109.839	0.0225116	0.324193	0.185459	2.67083	5	5	11	Infinity	100	Confident
C01R02	Q9WVL0	Maleylacetoacetate isomerase (MAAI_MOUSE)	ENSMUSG00000021033	Gstz1	12	GO:0008150, GO:0006790, GO:0009056, GO:0006520, GO:0043226, GO:0005575, GO:0003674, GO:0005622, GO:0044281, GO:0005623, GO:0005737, GO:0005739, GO:0051186, GO:0034641, GO:0016765, GO:0016853	catabolic process, cellular amino acid metabolic process, cofactor metabolic process, biological_process, organelle, transferase activity, transferring alkyl or aryl (other than methyl) groups, cellular_component, cell, molecular_function, mitochondrion, cytoplasm, cellular nitrogen compound metabolic process, small molecule metabolic process, sulfur compound metabolic process, isomerase activity…	24.2598	100	15.74	15.74	33.8834	0.00694444	0.232847	0.057211	1.91828	2	2	3	22.6371	87.4387	Doubtful
C01R02	Q04447	Creatine kinase B-type (KCRB_MOUSE)	ENSMUSG00000001270	Ckb	12	GO:0008150, GO:0043167, GO:0048856, GO:0043226, GO:0005575, GO:0003674, GO:0005622, GO:0005623, GO:0005634, GO:0005737, GO:0042592, GO:0005739, GO:0005829, GO:0016301, GO:0019899	enzyme binding, biological_process, cytosol, organelle, nucleus, cellular_component, cell, molecular_function, mitochondrion, cytoplasm, ion binding, kinase activity, homeostatic process, anatomical structure development, intracellular	42.6863	80.84	43.57	43.57	115.072	0.0235842	0.995262	0.194296	8.19936	13	13	32	Infinity	100	Confident
C01R02	P20108	Thioredoxin-dependent peroxide reductase, mitochondrial (PRDX3_MOUSE)	ENSMUSG00000024997	Prdx3	19	GO:0008283, GO:0009056, GO:0006464, GO:0048856, GO:0009058, GO:0043226, GO:0005575, GO:0003674, GO:0005623, GO:0008219, GO:0005768, GO:0016491, GO:0051186, GO:0005829, GO:0031410, GO:0034641, GO:0008150, GO:0006950, GO:0005622, GO:0000003, GO:0007005, GO:0002376, GO:0005737, GO:0042592, GO:0005739, GO:0030154, GO:0030234, GO:0019899	cell differentiation, cellular_component, cell, molecular_function, cytoplasm, endosome, cellular nitrogen compound metabolic process, biosynthetic process, enzyme regulator activity, immune system process, homeostatic process, enzyme binding, mitochondrion organization, catabolic process, cofactor metabolic process, cell proliferation, cell death, cytosol, biological_process, organelle, mitochon…	28.1094	76.26	17.51	17.51	127.737	0.0261799	0.492496	0.215681	4.05737	4	4	9	Infinity	100	Confident
C01R02	O35129	Prohibitin-2 (PHB2_MOUSE)	ENSMUSG00000004264	Phb2	6	GO:0008283, GO:0048856, GO:0006464, GO:0007059, GO:0009058, GO:0043226, GO:0005575, GO:0003674, GO:0000278, GO:0006913, GO:0005623, GO:0008219, GO:0140014, GO:0034641, GO:0008150, GO:0007165, GO:0006810, GO:0006950, GO:0005622, GO:0000003, GO:0007049, GO:0007005, GO:0005634, GO:0051276, GO:0005737, GO:0005739	mitotic cell cycle, cellular_component, cell, molecular_function, cytoplasm, cellular nitrogen compound metabolic process, biosynthetic process, mitotic nuclear division, mitochondrion organization, chromosome organization, cell proliferation, cell death, biological_process, signal transduction, cell cycle, organelle, nucleus, transport, mitochondrion, chromosome segregation, response to stress, …	33.2759	100	31.77	31.77	125.127	0.025645	0.567191	0.211274	4.67274	10	10	18	Infinity	100	Confident
C01R02	Q91VR2	ATP synthase subunit gamma, mitochondrial (ATPG_MOUSE)	ENSMUSG00000025781	Atp5c1	2	GO:0016887, GO:0008150, GO:0055085, GO:0022857, GO:0009058, GO:0043234, GO:0043226, GO:0005575, GO:0006810, GO:0003674, GO:0005622, GO:0044281, GO:0005623, GO:0005737, GO:0005739, GO:0034641	biological_process, transmembrane transporter activity, organelle, transport, protein complex, cellular_component, cell, atpase activity, molecular_function, mitochondrion, cytoplasm, transmembrane transport, cellular nitrogen compound metabolic process, biosynthetic process, small molecule metabolic process, intracellular	32.8651	73.49	19.8	19.8	169.695	0.0347793	0.43845	0.286525	3.61212	7	7	17	Infinity	100	Confident
C01R02	Q9EQ20	Methylmalonate-semialdehyde dehydrogenase [acylating], mitochondrial (MMSA_MOUSE)	ENSMUSG00000021238	Aldh6a1	12	GO:0008150, GO:0009056, GO:0006520, GO:0043226, GO:0005575, GO:0003674, GO:0005622, GO:0005654, GO:0044281, GO:0005634, GO:0005623, GO:0005737, GO:0016491, GO:0005739, GO:0030154, GO:0034641	catabolic process, nucleoplasm, cell differentiation, cellular amino acid metabolic process, biological_process, organelle, nucleus, cellular_component, cell, molecular_function, mitochondrion, cytoplasm, cellular nitrogen compound metabolic process, small molecule metabolic process, oxidoreductase activity, intracellular	57.8785	81.12	14.58	14.58	35.1275	0.00719942	0.193777	0.0593117	1.59641	5	5	10	Infinity	100	Confident
C01R02	Q99MN9	Propionyl-CoA carboxylase beta chain, mitochondrial (PCCB_MOUSE)	ENSMUSG00000032527	Pccb	9	GO:0008150, GO:0009056, GO:0043167, GO:0043226, GO:0005575, GO:0005622, GO:0003674, GO:0044281, GO:0005623, GO:0005737, GO:0006629, GO:0005739, GO:0016874	catabolic process, biological_process, organelle, cellular_component, cell, molecular_function, mitochondrion, cytoplasm, ion binding, small molecule metabolic process, lipid metabolic process, ligase activity, intracellular	58.3719	87.62	9.24	9.24	49.7528	0.0101969	0.128838	0.0840061	1.06142	4	4	10	Infinity	100	Confident
C01R02	P52760	2-iminobutanoate/2-iminopropanoate deaminase (RIDA_MOUSE)	ENSMUSG00000022323	Rida	15	GO:0008283, GO:0008150, GO:0009056, GO:0048856, GO:0043167, GO:0008289, GO:0009058, GO:0043226, GO:0005575, GO:0003674, GO:0005622, GO:0007049, GO:0006412, GO:0005623, GO:0005634, GO:0005777, GO:0005737, GO:0005739, GO:0004518, GO:0005829, GO:0034641	catabolic process, cell proliferation, biological_process, cell cycle, cytosol, organelle, nucleus, peroxisome, cellular_component, cell, lipid binding, molecular_function, mitochondrion, cytoplasm, ion binding, nuclease activity, cellular nitrogen compound metabolic process, biosynthetic process, translation, anatomical structure development, intracellular	14.2465	80	22.22	22.22	90.3557	0.0185185	0.389495	0.152563	3.20882	2	2	3	61.5309	96.3942	Confident
C01R02	Q6P069	Sorcin (SORCN_MOUSE)	ENSMUSG00000003161	Sri	5	GO:0043167, GO:0048856, GO:0043226, GO:0005576, GO:0005575, GO:0003013, GO:0003674, GO:0005654, GO:0005623, GO:0006913, GO:0005829, GO:0031410, GO:0008150, GO:0055085, GO:0007165, GO:0007267, GO:0005783, GO:0008134, GO:0008233, GO:0006810, GO:0005622, GO:0005886, GO:0005634, GO:0006605, GO:0005615, GO:0005737, GO:0042592, GO:0005739, GO:0019899	nucleoplasm, cell-cell signaling, transcription factor binding, extracellular region, cellular_component, cell, molecular_function, cytoplasm, ion binding, protein targeting, extracellular space, homeostatic process, enzyme binding, cytosol, biological_process, signal transduction, plasma membrane, organelle, nucleus, peptidase activity, transport, mitochondrion, circulatory system process, trans…	21.6133	72.22	5.56	5.56	34.1203	0.00699301	0.145048	0.0576111	1.19496	1	1	1	29.6332	90.1758	Doubtful
C01R02	Q8BMF4	Dihydrolipoyllysine-residue acetyltransferase component of pyruvate dehydrogenase complex, mitochondrial (ODP2_MOUSE)	ENSMUSG00000000168	Dlat	9	GO:0008150, GO:0006091, GO:0016746, GO:0006790, GO:0009058, GO:0043226, GO:0005575, GO:0005622, GO:0003674, GO:0044281, GO:0005975, GO:0005623, GO:0016491, GO:0005737, GO:0051186, GO:0005739, GO:0034641	carbohydrate metabolic process, cofactor metabolic process, biological_process, organelle, transferase activity, transferring acyl groups, cellular_component, cell, molecular_function, mitochondrion, cytoplasm, cellular nitrogen compound metabolic process, generation of precursor metabolites and energy, biosynthetic process, small molecule metabolic process, sulfur compound metabolic process, oxi…	67.8987	78.19	16.51	16.51	50.2862	0.0103062	0.311134	0.0849067	2.56324	9	9	15	Infinity	100	Confident
C01R02	P26443	Glutamate dehydrogenase 1, mitochondrial (DHE3_MOUSE)	ENSMUSG00000021794	Glud1	14	GO:0008150, GO:0009056, GO:0007267, GO:0048856, GO:0043167, GO:0006520, GO:0009058, GO:0043226, GO:0005575, GO:0006810, GO:0005622, GO:0003674, GO:0044281, GO:0005623, GO:0016491, GO:0005737, GO:0005739, GO:0050877, GO:0019899	enzyme binding, catabolic process, nervous system process, cellular amino acid metabolic process, biological_process, cell-cell signaling, organelle, transport, cellular_component, cell, molecular_function, mitochondrion, cytoplasm, ion binding, biosynthetic process, small molecule metabolic process, oxidoreductase activity, anatomical structure development, intracellular	61.2982	88.35	32.97	31	110.11	0.0225671	0.778279	0.185917	6.41177	17	17	39	Infinity	100	Confident
C01R02	Q8BMF3	NADP-dependent malic enzyme, mitochondrial (MAON_MOUSE)	ENSMUSG00000030621	Me3	7	GO:0044281, GO:0008150, GO:0005623, GO:0005737, GO:0016491, GO:0005739, GO:0043167, GO:0016829, GO:0043226, GO:0005575, GO:0005622, GO:0003674	cytoplasm, ion binding, biological_process, small molecule metabolic process, organelle, lyase activity, oxidoreductase activity, cell, cellular_component, intracellular, mitochondrion, molecular_function	67.0556	81.46	9.44	9.44	35.48	0.00727167	0.113974	0.0599068	0.938961	6	6	10	Infinity	100	Confident
C01R02	Q91WD5	NADH dehydrogenase [ubiquinone] iron-sulfur protein 2, mitochondrial (NDUS2_MOUSE)	ENSMUSG00000013593	Ndufs2	1	GO:0008150, GO:0006091, GO:0043167, GO:0043234, GO:0043226, GO:0005575, GO:0006950, GO:0005622, GO:0003674, GO:0005654, GO:0044281, GO:0005634, GO:0005623, GO:0005737, GO:0016491, GO:0005739, GO:0034641, GO:0019899	enzyme binding, nucleoplasm, biological_process, organelle, nucleus, protein complex, cellular_component, cell, molecular_function, mitochondrion, cytoplasm, ion binding, cellular nitrogen compound metabolic process, generation of precursor metabolites and energy, response to stress, small molecule metabolic process, oxidoreductase activity, intracellular	52.5917	87.9	20.3	20.3	38.4646	0.00788337	0.311134	0.0649463	2.56324	7	7	10	Infinity	100	Confident
C01R02	Q91WC3	Long-chain-fatty-acid--CoA ligase 6 (ACSL6_MOUSE)	ENSMUSG00000020333	Acsl6	11	GO:0008283, GO:0008150, GO:0048856, GO:0043167, GO:0005783, GO:0043226, GO:0005575, GO:0003674, GO:0005622, GO:0044281, GO:0005623, GO:0005777, GO:0005737, GO:0005739, GO:0006629, GO:0030154, GO:0016874, GO:0019899	enzyme binding, cell differentiation, cell proliferation, biological_process, organelle, peroxisome, cellular_component, cell, molecular_function, mitochondrion, cytoplasm, ion binding, small molecule metabolic process, lipid metabolic process, ligase activity, anatomical structure development, intracellular, endoplasmic reticulum	77.9672	77.19	5.31	5.31	19.2311	0.00394144	0.0964782	0.0324711	0.794825	3	3	4	71.1826	97.1848	Confident
C01R02	P62075	Mitochondrial import inner membrane translocase subunit Tim13 (TIM13_MOUSE)	ENSMUSG00000020219	Timm13	10	GO:0008150, GO:0061024, GO:0055085, GO:0043167, GO:0008565, GO:0005730, GO:0043226, GO:0005575, GO:0006810, GO:0003674, GO:0005622, GO:0007005, GO:0005623, GO:0005634, GO:0006605, GO:0005737, GO:0005739	mitochondrion organization, biological_process, organelle, nucleus, protein transporter activity, transport, cellular_component, cell, molecular_function, mitochondrion, cytoplasm, transmembrane transport, ion binding, membrane organization, nucleolus, protein targeting, intracellular	10.4509	100	14.74	14.74	51.3601	0.0105263	0.193777	0.0867199	1.59641	1	1	1	29.6332	90.1758	Doubtful
C01R02	Q8BMS1	Trifunctional enzyme subunit alpha, mitochondrial (ECHA_MOUSE)	ENSMUSG00000025745	Hadha	5	GO:0008150, GO:0016746, GO:0009056, GO:0016829, GO:0043167, GO:0005576, GO:0043226, GO:0005575, GO:0003674, GO:0005622, GO:0044281, GO:0005623, GO:0016491, GO:0005737, GO:0006629, GO:0005739	catabolic process, biological_process, organelle, transferase activity, transferring acyl groups, extracellular region, cellular_component, cell, molecular_function, mitochondrion, cytoplasm, ion binding, small molecule metabolic process, lyase activity, lipid metabolic process, oxidoreductase activity, intracellular	82.6175	78.77	6.55	4.59	28.4682	0.0058346	0.073811	0.0480677	0.608083	9	9	20	97.9195	97.3913	Confident
C01R02	Q9WUM5	Succinate--CoA ligase [ADP/GDP-forming] subunit alpha, mitochondrial (SUCA_MOUSE)	ENSMUSG00000052738	Suclg1	6	GO:0008150, GO:0006091, GO:0043226, GO:0005575, GO:0005886, GO:0005622, GO:0003674, GO:0044281, GO:0005623, GO:0005737, GO:0005739, GO:0005829, GO:0016874	biological_process, plasma membrane, cytosol, organelle, cellular_component, cell, molecular_function, mitochondrion, cytoplasm, generation of precursor metabolites and energy, small molecule metabolic process, ligase activity, intracellular	36.132	67.05	4.34	4.34	63.0932	0.012931	0.0660505	0.106531	0.54415	2	2	7	33.1024	94.564	Doubtful
C01R02	P63101	14-3-3 protein zeta/delta (1433Z_MOUSE)	ENSMUSG00000022285	Ywhaz	15	GO:0008150, GO:0022607, GO:0008134, GO:0043226, GO:0005575, GO:0006810, GO:0005622, GO:0003674, GO:0005623, GO:0006605, GO:0005634, GO:0008219, GO:0005737, GO:0005739, GO:0031410, GO:0005829, GO:0019899	enzyme binding, cell death, biological_process, cytosol, cellular component assembly, organelle, transcription factor binding, nucleus, transport, cellular_component, cell, molecular_function, mitochondrion, cytoplasm, cytoplasmic vesicle, protein targeting, intracellular	27.7537	100	53.06	53.06	118.218	0.0242289	1.5483	0.199607	12.7555	14	10	26	Infinity	100	Confident
C01R02	P14152	Malate dehydrogenase, cytoplasmic (MDHC_MOUSE)	ENSMUSG00000020321	Mdh1	11	GO:0008150, GO:0006091, GO:0043226, GO:0005575, GO:0003674, GO:0005622, GO:0044281, GO:0005623, GO:0005975, GO:0016491, GO:0005737, GO:0005739, GO:0051186, GO:0005829, GO:0034641	carbohydrate metabolic process, cofactor metabolic process, biological_process, cytosol, organelle, cellular_component, cell, molecular_function, mitochondrion, cytoplasm, cellular nitrogen compound metabolic process, generation of precursor metabolites and energy, small molecule metabolic process, oxidoreductase activity, intracellular	36.4881	68.56	31.74	31.74	245.654	0.050347	0.657724	0.414778	5.41859	11	11	38	Infinity	100	Confident
C01R02	P10605	Cathepsin B (CATB_MOUSE)	ENSMUSG00000021939	Ctsb	14	GO:0008150, GO:0009056, GO:0048856, GO:0008233, GO:0043226, GO:0044403, GO:0005576, GO:0005730, GO:0005773, GO:0005575, GO:0005622, GO:0003674, GO:0000003, GO:0005764, GO:0005623, GO:0005634, GO:0005615, GO:0005737, GO:0005739, GO:0030154, GO:0031410	catabolic process, cell differentiation, vacuole, biological_process, organelle, extracellular region, nucleus, peptidase activity, symbiont process, cellular_component, cell, molecular_function, mitochondrion, cytoplasm, cytoplasmic vesicle, nucleolus, extracellular space, anatomical structure development, intracellular, lysosome, reproduction	37.2557	58.11	5.31	5.31	64.4829	0.0132159	0.0926009	0.108877	0.762882	1	1	3	Infinity	100	Doubtful
C01R02	P70296	Phosphatidylethanolamine-binding protein 1 (PEBP1_MOUSE)	ENSMUSG00000032959	Pebp1	5	GO:0048856, GO:0043167, GO:0006464, GO:0008289, GO:0005794, GO:0043226, GO:0005576, GO:0005575, GO:0003013, GO:0000278, GO:0003674, GO:0005623, GO:0140014, GO:0031410, GO:0034641, GO:0008150, GO:0007165, GO:0005783, GO:0021700, GO:0007568, GO:0006950, GO:0007049, GO:0000003, GO:0005622, GO:0005615, GO:0005737, GO:0005739, GO:0030154, GO:0030234, GO:0019899	cell differentiation, extracellular region, mitotic cell cycle, cellular_component, cell, molecular_function, developmental maturation, cytoplasm, ion binding, cellular nitrogen compound metabolic process, enzyme regulator activity, mitotic nuclear division, extracellular space, enzyme binding, biological_process, signal transduction, cell cycle, organelle, lipid binding, mitochondrion, circulato…	20.8173	72.73	25.67	25.67	73.9274	0.0151515	0.467799	0.124824	3.85391	3	3	4	Infinity	100	Confident
C01R02	Q91V61	Sideroflexin-3 (SFXN3_MOUSE)	ENSMUSG00000025212	Sfxn3	19	GO:0005623, GO:0008150, GO:0055085, GO:0022857, GO:0005737, GO:0042592, GO:0005739, GO:0043226, GO:0006810, GO:0005575, GO:0003674, GO:0005622	cytoplasm, transmembrane transport, biological_process, transmembrane transporter activity, organelle, homeostatic process, transport, cell, cellular_component, intracellular, mitochondrion, molecular_function	35.3835	81	38.01	38.01	69.8232	0.0143103	0.84785	0.117894	6.98492	9	7	15	Infinity	100	Confident
C01R02	Q80XN0	D-beta-hydroxybutyrate dehydrogenase, mitochondrial (BDH_MOUSE)	ENSMUSG00000046598	Bdh1	16	GO:0008150, GO:0005634, GO:0005623, GO:0016491, GO:0005737, GO:0005739, GO:0043226, GO:0005575, GO:0005622, GO:0003674, GO:0005654	cytoplasm, nucleoplasm, biological_process, organelle, nucleus, oxidoreductase activity, cell, cellular_component, intracellular, mitochondrion, molecular_function	38.2744	83.38	8.75	8.75	39.0962	0.00801282	0.107757	0.0660127	0.887743	4	4	6	Infinity	100	Confident
C01R02	Q99LC5	Electron transfer flavoprotein subunit alpha, mitochondrial (ETFA_MOUSE)	ENSMUSG00000032314	Etfa	9	GO:0008150, GO:0006091, GO:0009056, GO:0043167, GO:0043234, GO:0043226, GO:0005575, GO:0005622, GO:0003674, GO:0044281, GO:0005623, GO:0016491, GO:0005737, GO:0006629, GO:0005739	catabolic process, biological_process, organelle, protein complex, cellular_component, cell, molecular_function, mitochondrion, cytoplasm, ion binding, generation of precursor metabolites and energy, small molecule metabolic process, lipid metabolic process, oxidoreductase activity, intracellular	34.9875	91.59	44.14	44.14	169.658	0.0347717	0.778279	0.286463	6.41177	9	9	22	Infinity	100	Confident
C01R02	Q99LC3	NADH dehydrogenase [ubiquinone] 1 alpha subcomplex subunit 10, mitochondrial (NDUAA_MOUSE)	ENSMUSG00000026260	Ndufa10	1	GO:0008150, GO:0006091, GO:0065003, GO:0006461, GO:0022607, GO:0043234, GO:0043226, GO:0005575, GO:0003674, GO:0007005, GO:0005622, GO:0044281, GO:0005623, GO:0016491, GO:0005737, GO:0005739, GO:0034641	mitochondrion organization, biological_process, cellular component assembly, organelle, macromolecular complex assembly, protein complex, cellular_component, cell, molecular_function, mitochondrion, cytoplasm, cellular nitrogen compound metabolic process, generation of precursor metabolites and energy, small molecule metabolic process, protein complex assembly, oxidoreductase activity, intracellu…	40.5777	90.99	25.07	25.07	75.2778	0.0154283	0.378907	0.127104	3.12158	6	6	12	Infinity	100	Confident
C01R02	Q8K4Z3	NAD(P)H-hydrate epimerase (NNRE_MOUSE)	ENSMUSG00000028070	Naxe	3	GO:0008150, GO:0065003, GO:0006461, GO:0022607, GO:0043167, GO:0005576, GO:0043226, GO:0005575, GO:0005622, GO:0003674, GO:0005654, GO:0044281, GO:0005623, GO:0005634, GO:0005615, GO:0005737, GO:0051186, GO:0005739, GO:0005929, GO:0005829, GO:0034641, GO:0016853	nucleoplasm, cofactor metabolic process, biological_process, cytosol, cellular component assembly, organelle, extracellular region, nucleus, macromolecular complex assembly, cellular_component, cell, molecular_function, mitochondrion, cytoplasm, cilium, ion binding, cellular nitrogen compound metabolic process, small molecule metabolic process, isomerase activity, protein complex assembly, extrac…	30.9528	63.83	9.22	9.22	127.789	0.0261905	0.211528	0.215767	1.74265	2	2	7	Infinity	100	Confident
C01R02	Q80Y14	Glutaredoxin-related protein 5, mitochondrial (GLRX5_MOUSE)	ENSMUSG00000021102	Glrx5	12	GO:0008150, GO:0006091, GO:0043167, GO:0048856, GO:0006464, GO:0043226, GO:0005575, GO:0003674, GO:0002376, GO:0005622, GO:0005623, GO:0005634, GO:0005737, GO:0016491, GO:0042592, GO:0005739, GO:0051604	protein maturation, biological_process, organelle, nucleus, cellular_component, cell, molecular_function, mitochondrion, cytoplasm, ion binding, generation of precursor metabolites and energy, cellular protein modification process, immune system process, oxidoreductase activity, homeostatic process, anatomical structure development, intracellular	16.2824	75	9.21	9.21	85.6001	0.0175439	0.145048	0.144533	1.19496	1	1	2	Infinity	100	Doubtful
C01R02	Q9CZW5	Mitochondrial import receptor subunit TOM70 (TOM70_MOUSE)		Tomm70		GO:0005623, GO:0005737, GO:0005739, GO:0043226, GO:0005575, GO:0003674, GO:0005622	cytoplasm, organelle, cell, cellular_component, intracellular, mitochondrion, molecular_function	67.5469	83.63	12.27	12.27	68.5348	0.0140463	0.220168	0.115719	1.81383	9	9	20	Infinity	100	Confident
C01R02	Q9WTP7	GTP:AMP phosphotransferase AK3, mitochondrial (KAD3_MOUSE)	ENSMUSG00000024782	Ak3	19	GO:0044281, GO:0005623, GO:0008150, GO:0005737, GO:0005739, GO:0043167, GO:0034641, GO:0043226, GO:0005575, GO:0016301, GO:0003674, GO:0005622	cytoplasm, ion binding, cellular nitrogen compound metabolic process, biological_process, kinase activity, small molecule metabolic process, organelle, cell, cellular_component, intracellular, mitochondrion, molecular_function	25.4105	100	14.98	11.01	60.9005	0.0124816	0.279802	0.102829	2.30512	3	3	4	Infinity	100	Confident
C01R02	Q99LX0	Protein DJ-1 (PARK7_MOUSE)	ENSMUSG00000028964	Park7	4	GO:0008283, GO:0009056, GO:0006464, GO:0043167, GO:0016829, GO:0006520, GO:0005694, GO:0009058, GO:0043226, GO:0005575, GO:0003674, GO:0005654, GO:0044281, GO:0005623, GO:0006913, GO:0008219, GO:0003723, GO:0016491, GO:0006914, GO:0051186, GO:0003729, GO:0005829, GO:0034641, GO:0008150, GO:0006091, GO:0055085, GO:0006790, GO:0007165, GO:0007267, GO:0000988, GO:0005783, GO:0043234, GO:0008233, GO:…	nucleoplasm, cellular amino acid metabolic process, cell-cell signaling, transcription factor binding, cellular_component, cell, rna binding, protein complex, molecular_function, transcription factor activity, protein binding, cytoplasm, ion binding, cellular nitrogen compound metabolic process, mrna binding, biosynthetic process, enzyme regulator activity, sulfur compound metabolic process, immu…	20.0084	85.71	18.52	18.52	77.4478	0.015873	0.221677	0.130768	1.82626	3	3	7	Infinity	100	Confident
C01R02	Q9CZU6	Citrate synthase, mitochondrial (CISY_MOUSE)	ENSMUSG00000005683	Cs	10	GO:0044281, GO:0005623, GO:0005975, GO:0008150, GO:0006091, GO:0016746, GO:0005737, GO:0005739, GO:0043226, GO:0005575, GO:0005622, GO:0003674	carbohydrate metabolic process, cytoplasm, generation of precursor metabolites and energy, biological_process, small molecule metabolic process, organelle, transferase activity, transferring acyl groups, cell, cellular_component, intracellular, mitochondrion, molecular_function	51.7034	64.87	20.69	20.69	76.5645	0.015692	0.467799	0.129277	3.85391	10	10	17	Infinity	100	Confident
C01R02	P63085	Mitogen-activated protein kinase 1 (MK01_MOUSE)	ENSMUSG00000063358	Mapk1	16	GO:0009790, GO:0007010, GO:0005794, GO:0043226, GO:0044281, GO:0005623, GO:0006913, GO:0008219, GO:0005829, GO:0050877, GO:0008150, GO:0007267, GO:0048646, GO:0006259, GO:0004871, GO:0006810, GO:0002376, GO:0005886, GO:0006412, GO:0005634, GO:0006605, GO:0042592, GO:0008283, GO:0040011, GO:0043167, GO:0048856, GO:0006464, GO:0009058, GO:0005575, GO:0003674, GO:0005654, GO:0005768, GO:0016192, GO:…	cell-cell signaling, anatomical structure formation involved in morphogenesis, transcription factor binding, molecular_function, protein targeting, immune system process, homeostatic process, enzyme binding, nervous system process, signal transduction, cytoskeleton, organelle, mitochondrion, cell motility, signal transducer activity, response to stress, kinase activity, small molecule metabolic p…	41.2492	84.08	13.97	13.97	69.2811	0.0141993	0.324193	0.116979	2.67083	6	4	14	Infinity	100	Confident
C01R02	P99029	Peroxiredoxin-5, mitochondrial (PRDX5_MOUSE)	ENSMUSG00000024953	Prdx5	19	GO:0008150, GO:0009056, GO:0009058, GO:0043226, GO:0005575, GO:0003674, GO:0005622, GO:0006950, GO:0044281, GO:0005777, GO:0003677, GO:0005634, GO:0005623, GO:0008219, GO:0016491, GO:0005737, GO:0042592, GO:0005739, GO:0051186, GO:0005829, GO:0031410, GO:0034641, GO:0030234	catabolic process, cofactor metabolic process, cell death, biological_process, cytosol, organelle, peroxisome, nucleus, cellular_component, cell, molecular_function, mitochondrion, cytoplasm, cytoplasmic vesicle, cellular nitrogen compound metabolic process, biosynthetic process, response to stress, small molecule metabolic process, enzyme regulator activity, dna binding, oxidoreductase activity,…	21.8835	100	38.1	38.1	134.077	0.0274792	1.42446	0.226384	11.7353	10	10	21	Infinity	100	Confident
C01R02	Q91VD9	NADH-ubiquinone oxidoreductase 75 kDa subunit, mitochondrial (NDUS1_MOUSE)	ENSMUSG00000025968	Ndufs1	1	GO:0008150, GO:0006091, GO:0043167, GO:0043234, GO:0043226, GO:0005575, GO:0003674, GO:0005622, GO:0007005, GO:0044281, GO:0005623, GO:0008219, GO:0016491, GO:0005737, GO:0005739, GO:0034641	mitochondrion organization, cell death, biological_process, organelle, protein complex, cellular_component, cell, molecular_function, mitochondrion, cytoplasm, ion binding, cellular nitrogen compound metabolic process, generation of precursor metabolites and energy, small molecule metabolic process, oxidoreductase activity, intracellular	79.7256	73.87	29.85	29.85	63.5091	0.0130163	0.557068	0.107233	4.58935	18	18	31	Infinity	100	Confident
C01R02	Q99LP6	GrpE protein homolog 1, mitochondrial (GRPE1_MOUSE)	ENSMUSG00000029198	Grpel1	5	GO:0008150, GO:0055085, GO:0051082, GO:0043234, GO:0043226, GO:0006457, GO:0005575, GO:0006810, GO:0003674, GO:0005622, GO:0007005, GO:0005634, GO:0005623, GO:0006605, GO:0005737, GO:0005739, GO:0030234	mitochondrion organization, biological_process, organelle, nucleus, transport, protein complex, cellular_component, cell, molecular_function, mitochondrion, cytoplasm, transmembrane transport, enzyme regulator activity, protein targeting, protein folding, intracellular, unfolded protein binding	24.2919	100	9.22	9.22	78.6969	0.016129	0.149757	0.132877	1.23376	2	2	5	Infinity	100	Confident
C01R02	Q91V92	ATP-citrate synthase (ACLY_MOUSE)	ENSMUSG00000020917	Acly	11	GO:0008150, GO:0016746, GO:0006790, GO:0043167, GO:0043234, GO:0009058, GO:0043226, GO:0005575, GO:0005622, GO:0003674, GO:0005886, GO:0005654, GO:0044281, GO:0005623, GO:0005634, GO:0005737, GO:0006629, GO:0051186, GO:0005739, GO:0005829	nucleoplasm, cofactor metabolic process, biological_process, plasma membrane, cytosol, organelle, transferase activity, transferring acyl groups, nucleus, protein complex, cellular_component, cell, molecular_function, mitochondrion, cytoplasm, ion binding, biosynthetic process, small molecule metabolic process, lipid metabolic process, sulfur compound metabolic process, intracellular	119.651	78.37	8.62	8.62	17.6499	0.00361738	0.154782	0.0298014	1.27515	13	13	17	179.717	97.7444	Confident
C01R02	P38060	Hydroxymethylglutaryl-CoA lyase, mitochondrial (HMGCL_MOUSE)	ENSMUSG00000028672	Hmgcl	4	GO:0008150, GO:0006790, GO:0065003, GO:0006461, GO:0022607, GO:0043167, GO:0048856, GO:0016829, GO:0009058, GO:0043226, GO:0005575, GO:0005622, GO:0003674, GO:0006950, GO:0007005, GO:0044281, GO:0005777, GO:0005623, GO:0005737, GO:0005739, GO:0006629, GO:0051186	mitochondrion organization, cofactor metabolic process, biological_process, cellular component assembly, organelle, peroxisome, macromolecular complex assembly, cellular_component, cell, molecular_function, mitochondrion, cytoplasm, ion binding, biosynthetic process, response to stress, small molecule metabolic process, lyase activity, lipid metabolic process, sulfur compound metabolic process, p…	34.2167	74.46	4.31	4.31	108.427	0.0222222	0.0746078	0.183075	0.614648	1	1	8	Infinity	100	Doubtful
C01R02	P08249	Malate dehydrogenase, mitochondrial (MDHM_MOUSE)	ENSMUSG00000019179	Mdh2	5	GO:0008150, GO:0006091, GO:0006464, GO:0043226, GO:0005575, GO:0003674, GO:0005622, GO:0044281, GO:0005623, GO:0005975, GO:0016491, GO:0005737, GO:0051186, GO:0005739, GO:0034641	carbohydrate metabolic process, cofactor metabolic process, biological_process, organelle, cellular_component, cell, molecular_function, mitochondrion, cytoplasm, cellular nitrogen compound metabolic process, generation of precursor metabolites and energy, small molecule metabolic process, cellular protein modification process, oxidoreductase activity, intracellular	35.5888	86.39	49.41	49.41	140.314	0.0287575	1.58086	0.236916	13.0238	14	14	38	Infinity	100	Confident
C01R02	P63011	Ras-related protein Rab-3A (RAB3A_MOUSE)	ENSMUSG00000111277	Rab3a	CHR_MG190_MG3751_PATCH	GO:0043167, GO:0048856, GO:0043226, GO:0005575, GO:0003674, GO:0005623, GO:0005768, GO:0016192, GO:0003924, GO:0031410, GO:0005829, GO:0050877, GO:0008150, GO:0061024, GO:0000902, GO:0007267, GO:0021700, GO:0006810, GO:0005622, GO:0005886, GO:0007005, GO:0005737, GO:0030154, GO:0008092, GO:0030234, GO:0019899	cell differentiation, cell-cell signaling, gtpase activity, cellular_component, cell, molecular_function, developmental maturation, cytoplasm, ion binding, endosome, membrane organization, enzyme regulator activity, cell morphogenesis, cytoskeletal protein binding, enzyme binding, mitochondrion organization, nervous system process, cytosol, biological_process, plasma membrane, organelle, transpor…	24.9541	87.27	52.73	52.73	102.174	0.0209407	1.75423	0.172517	14.452	11	7	24	Infinity	100	Confident
C01R02	Q9CZP5	Mitochondrial chaperone BCS1 (BCS1_MOUSE)	ENSMUSG00000026172	Bcs1l	1	GO:0008150, GO:0065003, GO:0006461, GO:0022607, GO:0043167, GO:0043226, GO:0005575, GO:0007005, GO:0005622, GO:0003674, GO:0005623, GO:0005737, GO:0005739	mitochondrion organization, biological_process, cellular component assembly, organelle, macromolecular complex assembly, cellular_component, cell, molecular_function, mitochondrion, cytoplasm, ion binding, protein complex assembly, intracellular	47.3763	86.84	4.55	4.55	23.3455	0.00478469	0.0550081	0.0394181	0.453179	2	2	4	23.7898	88.2411	Doubtful
C01R02	P63030	Mitochondrial pyruvate carrier 1 (MPC1_MOUSE)	ENSMUSG00000023861	Mpc1	17	GO:0008150, GO:0055085, GO:0022857, GO:0006790, GO:0009058, GO:0043226, GO:0005575, GO:0006810, GO:0003674, GO:0005622, GO:0044281, GO:0005623, GO:0005737, GO:0005739, GO:0051186, GO:0034641	cofactor metabolic process, biological_process, transmembrane transporter activity, organelle, transport, cellular_component, cell, molecular_function, mitochondrion, cytoplasm, transmembrane transport, cellular nitrogen compound metabolic process, biosynthetic process, small molecule metabolic process, sulfur compound metabolic process, intracellular	12.4463	76.15	7.34	7.34	67.1451	0.0137615	0.389495	0.113372	3.20882	3	3	3	61.4757	96.4072	Confident
C01R02	P63038	60 kDa heat shock protein, mitochondrial (CH60_MOUSE)	ENSMUSG00000025980	Hspd1	1	GO:0008283, GO:0043167, GO:0048856, GO:0007155, GO:0005794, GO:0008289, GO:0009058, GO:0005576, GO:0043226, GO:0005575, GO:0003674, GO:0005623, GO:0003723, GO:0008219, GO:0005768, GO:0005829, GO:0031410, GO:0034641, GO:0008150, GO:0055085, GO:0007165, GO:0051082, GO:0005783, GO:0043234, GO:0044403, GO:0006259, GO:0006457, GO:0006810, GO:0006950, GO:0005622, GO:0005886, GO:0002376, GO:0007005, GO:…	extracellular region, cellular_component, cell, rna binding, protein complex, molecular_function, cytoplasm, ion binding, endosome, cellular nitrogen compound metabolic process, biosynthetic process, cell adhesion, protein targeting, protein folding, immune system process, extracellular space, unfolded protein binding, enzyme binding, mitochondrion organization, cell proliferation, cell death, dn…	60.9174	94.76	49.04	49.04	78.3135	0.0160505	1.06571	0.13223	8.7797	27	27	61	Infinity	100	Confident
C01R02	Q99KE1	NAD-dependent malic enzyme, mitochondrial (MAOM_MOUSE)	ENSMUSG00000024556	Me2	18	GO:0008150, GO:0043167, GO:0016829, GO:0043226, GO:0005575, GO:0005622, GO:0003674, GO:0044281, GO:0005623, GO:0005737, GO:0016491, GO:0005739, GO:0051186, GO:0034641	cofactor metabolic process, biological_process, organelle, cellular_component, cell, molecular_function, mitochondrion, cytoplasm, ion binding, cellular nitrogen compound metabolic process, small molecule metabolic process, lyase activity, oxidoreductase activity, intracellular	65.7569	69.44	4.24	4.24	23.4127	0.00479846	0.0771051	0.0395316	0.635221	2	2	3	Infinity	100	Confident
C01R02	Q925N0	Sideroflexin-5 (SFXN5_MOUSE)	ENSMUSG00000033720	Sfxn5	6	GO:0005623, GO:0008150, GO:0055085, GO:0022857, GO:0005737, GO:0042592, GO:0005739, GO:0043226, GO:0006810, GO:0005575, GO:0005622, GO:0003674	cytoplasm, transmembrane transport, biological_process, transmembrane transporter activity, organelle, homeostatic process, transport, cell, cellular_component, intracellular, mitochondrion, molecular_function	37.3049	65.5	12.57	12.57	119.802	0.0245536	0.279802	0.202282	2.30512	3	3	9	Infinity	100	Confident
C01R02	Q9CYH2	Redox-regulatory protein FAM213A (F213A_MOUSE)	ENSMUSG00000021792	Fam213a	14	GO:0005623, GO:0008150, GO:0005737, GO:0005739, GO:0048856, GO:0030154, GO:0043226, GO:0005576, GO:0005575, GO:0003674, GO:0002376, GO:0005622	cytoplasm, cell differentiation, biological_process, organelle, extracellular region, immune system process, cell, anatomical structure development, cellular_component, intracellular, mitochondrion, molecular_function	24.3789	73.85	14.68	14.68	73.5342	0.0150709	0.240938	0.12416	1.98494	3	3	6	Infinity	100	Confident
C01R02	Q99KI0	Aconitate hydratase, mitochondrial (ACON_MOUSE)	ENSMUSG00000022477	Aco2	15	GO:0008150, GO:0006091, GO:0016829, GO:0048856, GO:0043167, GO:0043226, GO:0005575, GO:0005622, GO:0006950, GO:0003674, GO:0044281, GO:0005623, GO:0005737, GO:0005739	biological_process, organelle, cellular_component, cell, molecular_function, mitochondrion, cytoplasm, ion binding, generation of precursor metabolites and energy, response to stress, small molecule metabolic process, lyase activity, anatomical structure development, intracellular	85.41	76.54	46.79	45	81.7721	0.0167593	1.27155	0.13807	10.4755	32	32	79	Infinity	100	Confident
C01R02	P16858	Glyceraldehyde-3-phosphate dehydrogenase (G3P_MOUSE)	ENSMUSG00000057666	Gapdh	6	GO:0007010, GO:0009056, GO:0048856, GO:0006464, GO:0009058, GO:0043226, GO:0005576, GO:0005575, GO:0003674, GO:0044281, GO:0005623, GO:0008219, GO:0016491, GO:0051186, GO:0005829, GO:0034641, GO:0008150, GO:0006091, GO:0043234, GO:0044403, GO:0006810, GO:0002376, GO:0005622, GO:0005886, GO:0006950, GO:0006412, GO:0005635, GO:0005811, GO:0005634, GO:0005975, GO:0005856, GO:0005737, GO:0005739, GO:…	carbohydrate metabolic process, extracellular region, cellular_component, cell, protein complex, molecular_function, cytoplasm, cellular nitrogen compound metabolic process, biosynthetic process, enzyme regulator activity, immune system process, cytoskeletal protein binding, lipid droplet, enzyme binding, catabolic process, cofactor metabolic process, cytoskeleton organization, cell death, cytoso…	35.7872	80.18	59.46	55.26	122.688	0.025145	1.86512	0.207154	15.3656	20	20	44	Infinity	100	Confident
C01R02	P15532	Nucleoside diphosphate kinase A (NDKA_MOUSE)	ENSMUSG00000037601	Nme1	11	GO:0008283, GO:0048856, GO:0043167, GO:0009058, GO:0043226, GO:0005575, GO:0003674, GO:0044281, GO:0005623, GO:0008219, GO:0016192, GO:0004518, GO:0005829, GO:0034641, GO:0008150, GO:0006259, GO:0006810, GO:0005886, GO:0005622, GO:0002376, GO:0005634, GO:0003677, GO:0005856, GO:0005815, GO:0005737, GO:0042592, GO:0005739, GO:0030154, GO:0008092, GO:0016301, GO:0019899	cell differentiation, cellular_component, cell, molecular_function, cytoplasm, ion binding, cellular nitrogen compound metabolic process, biosynthetic process, immune system process, homeostatic process, cytoskeletal protein binding, enzyme binding, cell proliferation, cell death, dna metabolic process, cytosol, biological_process, plasma membrane, cytoskeleton, organelle, nucleus, transport, mit…	17.1969	100	30.92	30.92	192.6	0.0394737	0.668101	0.3252	5.50407	5	5	13	Infinity	100	Confident
C01R02	Q9JM14	5'(3')-deoxyribonucleotidase, cytosolic type (NT5C_MOUSE)	ENSMUSG00000020736	Nt5c	11	GO:0008150, GO:0009056, GO:0043167, GO:0043226, GO:0005575, GO:0005622, GO:0003674, GO:0044281, GO:0005634, GO:0005623, GO:0005737, GO:0005739, GO:0016791, GO:0034655, GO:0005829, GO:0034641	catabolic process, nucleobase-containing compound catabolic process, biological_process, cytosol, organelle, nucleus, cellular_component, cell, molecular_function, mitochondrion, cytoplasm, ion binding, phosphatase activity, cellular nitrogen compound metabolic process, small molecule metabolic process, intracellular	23.0618	84.5	10.5	10.5	57.7421	0.0118343	0.100694	0.0974957	0.829558	1	1	2	Infinity	100	Doubtful
C01R02	P68037	Ubiquitin-conjugating enzyme E2 L3 (UB2L3_MOUSE)	ENSMUSG00000038965	Ube2l3	16	GO:0008283, GO:0008150, GO:0043167, GO:0000988, GO:0006464, GO:0009058, GO:0043226, GO:0006810, GO:0005575, GO:0007005, GO:0003674, GO:0007049, GO:0005622, GO:0006605, GO:0005634, GO:0005623, GO:0005737, GO:0034641, GO:0030234, GO:0019899	enzyme binding, mitochondrion organization, cell proliferation, biological_process, cell cycle, organelle, nucleus, transport, cellular_component, cell, molecular_function, transcription factor activity, protein binding, cytoplasm, ion binding, cellular nitrogen compound metabolic process, biosynthetic process, enzyme regulator activity, protein targeting, cellular protein modification process, i…	17.8502	100	29.87	29.87	58.0858	0.0119048	0.333521	0.0980761	2.74768	4	4	4	Infinity	100	Confident
C01R02	Q8VE95	UPF0598 protein C8orf82 homolog (CH082_MOUSE)				GO:0008150, GO:0005623, GO:0005737, GO:0005739, GO:0043226, GO:0005575, GO:0003674, GO:0005622	cytoplasm, biological_process, organelle, cell, cellular_component, intracellular, mitochondrion, molecular_function	24.3143	86.7	5.5	5.5	22.3817	0.00458716	0.105295	0.0377908	0.867462	2	2	3	29.8671	91.6936	Doubtful
C01R02	P32020	Non-specific lipid-transfer protein (NLTP_MOUSE)	ENSMUSG00000028603	Scp2	4	GO:0061024, GO:0008150, GO:0016746, GO:0006790, GO:0043167, GO:0008289, GO:0009058, GO:0043226, GO:0005575, GO:0006810, GO:0005622, GO:0003674, GO:0005654, GO:0044281, GO:0005634, GO:0005777, GO:0005623, GO:0007009, GO:0005737, GO:0005739, GO:0051186, GO:0006629	nucleoplasm, cofactor metabolic process, biological_process, organelle, transferase activity, transferring acyl groups, nucleus, peroxisome, transport, cellular_component, cell, lipid binding, molecular_function, mitochondrion, cytoplasm, plasma membrane organization, ion binding, biosynthetic process, membrane organization, small molecule metabolic process, lipid metabolic process, sulfur compou…	59.0878	70.93	3.29	3.29	64.3541	0.0131894	0.0826367	0.10866	0.680794	5	5	9	Infinity	100	Confident
C01R02	P46638	Ras-related protein Rab-11B (RB11B_MOUSE)	ENSMUSG00000077450	Rab11b	17	GO:0008150, GO:0007267, GO:0043167, GO:0043226, GO:0006810, GO:0005575, GO:0005622, GO:0003674, GO:0005623, GO:0005768, GO:0016192, GO:0005737, GO:0043473, GO:0003924, GO:0042592, GO:0005739, GO:0031410, GO:0008092	biological_process, cell-cell signaling, organelle, gtpase activity, transport, cellular_component, cell, molecular_function, mitochondrion, cytoplasm, pigmentation, ion binding, endosome, cytoplasmic vesicle, homeostatic process, cytoskeletal protein binding, intracellular, vesicle-mediated transport	24.4745	87.61	30.73	30.73	278.652	0.0571101	0.53174	0.470495	4.38068	7	7	20	Infinity	100	Confident
C01R02	P20029	78 kDa glucose-regulated protein (GRP78_MOUSE)	ENSMUSG00000026864	Hspa5	2	GO:0016887, GO:0009790, GO:0040011, GO:0009056, GO:0043167, GO:0006464, GO:0048856, GO:0043226, GO:0005576, GO:0005575, GO:0003674, GO:0005623, GO:0008219, GO:0034641, GO:0008150, GO:0007165, GO:0051082, GO:0005783, GO:0043234, GO:0006810, GO:0005622, GO:0006950, GO:0005886, GO:0048870, GO:0005634, GO:0005737, GO:0005739, GO:0030154, GO:0019899	cell differentiation, locomotion, embryo development, extracellular region, cellular_component, cell, protein complex, molecular_function, cytoplasm, ion binding, cellular nitrogen compound metabolic process, unfolded protein binding, enzyme binding, catabolic process, cell death, biological_process, signal transduction, plasma membrane, organelle, nucleus, transport, atpase activity, mitochondri…	72.3775	85.95	14.05	14.05	51.8542	0.0106276	0.203538	0.0875542	1.67682	7	5	14	Infinity	100	Confident
C01R02	Q8VEM8	Phosphate carrier protein, mitochondrial (MPCP_MOUSE)	ENSMUSG00000061904	Slc25a3	10	GO:0005623, GO:0008150, GO:0055085, GO:0022857, GO:0005737, GO:0005739, GO:0043226, GO:0006810, GO:0005575, GO:0003674, GO:0005622	cytoplasm, transmembrane transport, biological_process, transmembrane transporter activity, organelle, transport, cell, cellular_component, intracellular, mitochondrion, molecular_function	39.6065	75.63	22.97	22.97	161.747	0.0331502	1.11349	0.273104	9.17336	13	13	37	Infinity	100	Confident
C01R02	Q8BKZ9	Pyruvate dehydrogenase protein X component, mitochondrial (ODPX_MOUSE)	ENSMUSG00000010914	Pdhx	2	GO:0008150, GO:0016746, GO:0006790, GO:0009058, GO:0043226, GO:0005575, GO:0003674, GO:0005622, GO:0044281, GO:0005623, GO:0016491, GO:0005737, GO:0051186, GO:0005739, GO:0034641	cofactor metabolic process, biological_process, organelle, transferase activity, transferring acyl groups, cellular_component, cell, molecular_function, mitochondrion, cytoplasm, cellular nitrogen compound metabolic process, biosynthetic process, small molecule metabolic process, sulfur compound metabolic process, oxidoreductase activity, intracellular	53.9652	69.86	5.59	5.59	30.1931	0.00618812	0.0873357	0.0509801	0.719505	3	3	4	Infinity	100	Confident
C01R02	P10637	Microtubule-associated protein tau (TAU_MOUSE)	ENSMUSG00000018411	Mapt	11	GO:0007010, GO:0009056, GO:0040011, GO:0006461, GO:0022607, GO:0006464, GO:0048856, GO:0043226, GO:0005575, GO:0003674, GO:0005654, GO:0005623, GO:0008219, GO:0030705, GO:0006914, GO:0005929, GO:0005829, GO:0050877, GO:0008150, GO:0065003, GO:0007165, GO:0000902, GO:0043234, GO:0004871, GO:0006810, GO:0005886, GO:0006950, GO:0040007, GO:0005622, GO:0007005, GO:0048870, GO:0003677, GO:0005634, GO:…	nucleoplasm, cell differentiation, cellular component assembly, locomotion, cellular_component, cell, protein complex, molecular_function, cytoplasm, cilium, cell morphogenesis, cytoskeletal protein binding, enzyme binding, mitochondrion organization, catabolic process, nervous system process, autophagy, cytoskeleton organization, cell death, cytosol, biological_process, signal transduction, plas…	76.1973	67.53	14.05	14.05	78.4806	0.0160847	0.29155	0.132512	2.4019	10	10	21	Infinity	100	Confident
C01R02	Q99L04	Dehydrogenase/reductase SDR family member 1 (DHRS1_MOUSE)	ENSMUSG00000002332	Dhrs1	14	GO:0008150, GO:0005623, GO:0005737, GO:0016491, GO:0005739, GO:0005783, GO:0043226, GO:0005575, GO:0003674, GO:0005622	cytoplasm, biological_process, organelle, oxidoreductase activity, cell, cellular_component, intracellular, endoplasmic reticulum, mitochondrion, molecular_function	33.9834	91.37	3.83	3.83	15.5885	0.00319489	0.0722672	0.0263207	0.595365	1	1	1	29.6332	90.1758	Doubtful
C01R02	Q99L43	Phosphatidate cytidylyltransferase 2 (CDS2_MOUSE)	ENSMUSG00000058793	Cds2	2	GO:0008150, GO:0016779, GO:0007165, GO:0005783, GO:0009058, GO:0043226, GO:0005575, GO:0003674, GO:0005622, GO:0005623, GO:0005975, GO:0005737, GO:0006629, GO:0005739	carbohydrate metabolic process, biological_process, signal transduction, organelle, nucleotidyltransferase activity, cellular_component, cell, molecular_function, mitochondrion, cytoplasm, biosynthetic process, lipid metabolic process, intracellular, endoplasmic reticulum	51.28	54.73	6.53	6.53	41.2327	0.0084507	0.132541	0.0696202	1.09193	2	2	4	Infinity	100	Confident
C01R02	P52480	Pyruvate kinase PKM (KPYM_MOUSE)	ENSMUSG00000032294	Pkm	9	GO:0008150, GO:0006091, GO:0009056, GO:0043167, GO:0043226, GO:0005576, GO:0005575, GO:0003674, GO:0005622, GO:0044281, GO:0005623, GO:0005634, GO:0005975, GO:0008219, GO:0005737, GO:0005739, GO:0051186, GO:0005929, GO:0005829, GO:0034641, GO:0016301	carbohydrate metabolic process, catabolic process, cofactor metabolic process, cell death, biological_process, cytosol, organelle, extracellular region, nucleus, cellular_component, cell, molecular_function, mitochondrion, cytoplasm, cilium, ion binding, cellular nitrogen compound metabolic process, generation of precursor metabolites and energy, kinase activity, small molecule metabolic process,…	57.808	94.16	57.63	57.63	118.556	0.0242982	1.82887	0.200178	15.0669	30	29	75	Infinity	100	Confident
C01R02	Q9CZ13	Cytochrome b-c1 complex subunit 1, mitochondrial (QCR1_MOUSE)	ENSMUSG00000107235	Uqcrc1	CHR_MG117_PATCH	GO:0008150, GO:0006091, GO:0043167, GO:0043234, GO:0008233, GO:0043226, GO:0005575, GO:0003674, GO:0005622, GO:0044281, GO:0005623, GO:0005737, GO:0005739, GO:0005829, GO:0051604, GO:0034641, GO:0019899	enzyme binding, protein maturation, biological_process, cytosol, organelle, peptidase activity, protein complex, cellular_component, cell, molecular_function, mitochondrion, cytoplasm, ion binding, cellular nitrogen compound metabolic process, generation of precursor metabolites and energy, small molecule metabolic process, intracellular	52.8185	71.04	30.83	30.83	79.0088	0.016193	0.944862	0.133404	7.78414	14	14	24	Infinity	100	Confident
C01R02	Q4KMM3	Oxidation resistance protein 1 (OXR1_MOUSE)	ENSMUSG00000022307	Oxr1	15	GO:0008150, GO:0006464, GO:0005730, GO:0043226, GO:0005575, GO:0005622, GO:0006950, GO:0003674, GO:0005654, GO:0005634, GO:0005623, GO:0008219, GO:0016491, GO:0005737, GO:0005739	nucleoplasm, cell death, biological_process, organelle, nucleus, cellular_component, cell, molecular_function, mitochondrion, cytoplasm, response to stress, nucleolus, cellular protein modification process, oxidoreductase activity, intracellular	95.8525	78.29	4.85	4.85	32.1001	0.00657895	0.073811	0.0541999	0.608083	6	6	12	Infinity	100	Confident
C01R02	P09671	Superoxide dismutase [Mn], mitochondrial (SODM_MOUSE)	ENSMUSG00000006818	Sod2	17	GO:0008283, GO:0006461, GO:0040011, GO:0022607, GO:0043167, GO:0048856, GO:0009058, GO:0043226, GO:0005575, GO:0003013, GO:0003674, GO:0005623, GO:0008219, GO:0016491, GO:0043473, GO:0051186, GO:0034641, GO:0050877, GO:0008150, GO:0006091, GO:0065003, GO:0006790, GO:0007165, GO:0007568, GO:0006950, GO:0005622, GO:0002376, GO:0007005, GO:0048870, GO:0003677, GO:0005737, GO:0042592, GO:0005739, GO:…	cell differentiation, cellular component assembly, locomotion, cellular_component, cell, molecular_function, cytoplasm, ion binding, cellular nitrogen compound metabolic process, biosynthetic process, sulfur compound metabolic process, immune system process, homeostatic process, enzyme binding, mitochondrion organization, nervous system process, cofactor metabolic process, cell proliferation, cel…	24.5875	71.17	26.58	26.58	136.408	0.027957	0.649648	0.230321	5.35205	5	5	13	Infinity	100	Confident
C01R02	Q99L13	3-hydroxyisobutyrate dehydrogenase, mitochondrial (3HIDH_MOUSE)	ENSMUSG00000029776	Hibadh	6	GO:0044281, GO:0008150, GO:0005623, GO:0016491, GO:0005737, GO:0009056, GO:0005739, GO:0006520, GO:0043226, GO:0005575, GO:0003674, GO:0005622	cytoplasm, catabolic process, cellular amino acid metabolic process, biological_process, small molecule metabolic process, organelle, oxidoreductase activity, cell, cellular_component, intracellular, mitochondrion, molecular_function	35.4166	77.31	19.1	19.1	60.2837	0.0123552	0.433013	0.101787	3.56733	5	5	8	Infinity	100	Confident
C01R02	Q8JZN5	Acyl-CoA dehydrogenase family member 9, mitochondrial (ACAD9_MOUSE)	ENSMUSG00000027710	Acad9	3	GO:0008150, GO:0065003, GO:0006461, GO:0022607, GO:0043167, GO:0043226, GO:0005575, GO:0003674, GO:0007005, GO:0005622, GO:0044281, GO:0005623, GO:0005634, GO:0016491, GO:0005737, GO:0005739, GO:0006629	mitochondrion organization, biological_process, cellular component assembly, organelle, nucleus, macromolecular complex assembly, cellular_component, cell, molecular_function, mitochondrion, cytoplasm, ion binding, small molecule metabolic process, lipid metabolic process, protein complex assembly, oxidoreductase activity, intracellular	68.6787	86.08	6.08	6.08	28.7495	0.00589226	0.0670113	0.0485427	0.552065	3	3	6	Infinity	100	Confident
C01R02	Q9DB20	ATP synthase subunit O, mitochondrial (ATPO_MOUSE)	ENSMUSG00000022956	Atp5o	16	GO:0016887, GO:0008150, GO:0055085, GO:0022857, GO:0008289, GO:0009058, GO:0043234, GO:0043226, GO:0005576, GO:0006810, GO:0005575, GO:0005886, GO:0005622, GO:0003674, GO:0044281, GO:0005623, GO:0005737, GO:0005739, GO:0034641	biological_process, transmembrane transporter activity, plasma membrane, organelle, extracellular region, transport, protein complex, cellular_component, cell, atpase activity, lipid binding, molecular_function, mitochondrion, cytoplasm, transmembrane transport, cellular nitrogen compound metabolic process, biosynthetic process, small molecule metabolic process, intracellular	23.3487	100	43.19	43.19	116.662	0.0239101	0.654817	0.196981	5.39464	7	7	16	Infinity	100	Confident
C01R02	Q9DB73	NADH-cytochrome b5 reductase 1 (NB5R1_MOUSE)	ENSMUSG00000026456	Cyb5r1	1	GO:0008150, GO:0009058, GO:0043226, GO:0006810, GO:0005575, GO:0007005, GO:0003674, GO:0005622, GO:0005623, GO:0006605, GO:0005737, GO:0016491, GO:0005739, GO:0006629	mitochondrion organization, biological_process, organelle, transport, cellular_component, cell, molecular_function, mitochondrion, cytoplasm, biosynthetic process, lipid metabolic process, protein targeting, oxidoreductase activity, intracellular	34.1131	68.2	6.56	6.56	31.1439	0.00638298	0.145048	0.0525855	1.19496	2	2	3	39.5139	95.2928	Confident
C01R02	Q9DB77	Cytochrome b-c1 complex subunit 2, mitochondrial (QCR2_MOUSE)	ENSMUSG00000030884	Uqcrc2	7	GO:0008150, GO:0043167, GO:0008233, GO:0043234, GO:0043226, GO:0005575, GO:0006810, GO:0007005, GO:0003674, GO:0005622, GO:0005654, GO:0005623, GO:0005634, GO:0006605, GO:0005737, GO:0005739, GO:0051604	mitochondrion organization, nucleoplasm, protein maturation, biological_process, organelle, nucleus, peptidase activity, transport, protein complex, cellular_component, cell, molecular_function, mitochondrion, cytoplasm, ion binding, protein targeting, intracellular	48.205	70.86	38.41	34.66	129.152	0.0264698	0.916941	0.218068	7.55411	13	13	28	Infinity	100	Confident
C01R02	Q60930	Voltage-dependent anion-selective channel protein 2 (VDAC2_MOUSE)	ENSMUSG00000021771	Vdac2	14	GO:0008150, GO:0055085, GO:0022857, GO:0065003, GO:0006461, GO:0007165, GO:0022607, GO:0043234, GO:0043226, GO:0005575, GO:0006810, GO:0005622, GO:0000003, GO:0003674, GO:0005623, GO:0008219, GO:0005737, GO:0005739, GO:0031410	cell death, biological_process, transmembrane transporter activity, signal transduction, cellular component assembly, organelle, macromolecular complex assembly, transport, protein complex, cellular_component, cell, molecular_function, mitochondrion, cytoplasm, transmembrane transport, cytoplasmic vesicle, protein complex assembly, intracellular, reproduction	31.7126	86.1	26.44	26.44	114.296	0.0234252	0.487352	0.192986	4.015	5	5	12	Infinity	100	Confident
C01R02	Q60931	Voltage-dependent anion-selective channel protein 3 (VDAC3_MOUSE)	ENSMUSG00000008892	Vdac3	8	GO:0008150, GO:0055085, GO:0022857, GO:0022607, GO:0007267, GO:0043234, GO:0043226, GO:0005575, GO:0006810, GO:0005622, GO:0003674, GO:0006950, GO:0005623, GO:0005737, GO:0005739, GO:0050877	nervous system process, biological_process, transmembrane transporter activity, cell-cell signaling, cellular component assembly, organelle, transport, protein complex, cellular_component, cell, molecular_function, mitochondrion, cytoplasm, transmembrane transport, response to stress, intracellular	30.7334	85.51	20.49	20.49	162.976	0.0334022	0.433013	0.27518	3.56733	6	5	20	Infinity	100	Confident
C01R02	Q60932	Voltage-dependent anion-selective channel protein 1 (VDAC1_MOUSE)	ENSMUSG00000020402	Vdac1	11	GO:0008150, GO:0055085, GO:0022857, GO:0009056, GO:0007267, GO:0043234, GO:0043226, GO:0005575, GO:0006810, GO:0005622, GO:0003674, GO:0006950, GO:0005886, GO:0007005, GO:0005623, GO:0008219, GO:0005737, GO:0006914, GO:0005739, GO:0031410, GO:0050877, GO:0019899	enzyme binding, mitochondrion organization, catabolic process, nervous system process, autophagy, cell death, biological_process, transmembrane transporter activity, cell-cell signaling, plasma membrane, organelle, transport, protein complex, cellular_component, cell, molecular_function, mitochondrion, cytoplasm, transmembrane transport, cytoplasmic vesicle, response to stress, intracellular	32.3314	100	55.74	55.74	162.405	0.0332852	1.5483	0.274216	12.7555	13	12	57	Infinity	100	Confident
C01R02	Q59J78	NADH dehydrogenase [ubiquinone] 1 alpha subcomplex assembly factor 2 (NDUF2_MOUSE)	ENSMUSG00000068184	Ndufaf2	13	GO:0008150, GO:0006091, GO:0007267, GO:0043226, GO:0006810, GO:0005575, GO:0003674, GO:0005622, GO:0005623, GO:0016491, GO:0005737, GO:0042592, GO:0005739	biological_process, cell-cell signaling, organelle, transport, cellular_component, cell, molecular_function, mitochondrion, cytoplasm, generation of precursor metabolites and energy, oxidoreductase activity, homeostatic process, intracellular	19.6158	100	17.86	7.14	101.65	0.0208333	0.172102	0.171633	1.41785	4	4	9	Infinity	100	Doubtful
C01R02	Q9DB41	Mitochondrial glutamate carrier 2 (GHC2_MOUSE)	ENSMUSG00000004902	Slc25a18	6	GO:0005623, GO:0008150, GO:0055085, GO:0022857, GO:0005737, GO:0005739, GO:0043226, GO:0006810, GO:0005575, GO:0003674, GO:0005622	cytoplasm, transmembrane transport, biological_process, transmembrane transporter activity, organelle, transport, cell, cellular_component, intracellular, mitochondrion, molecular_function	34.1438	74.69	5.63	5.63	20.33	0.00416667	0.149757	0.0343266	1.23376	2	1	2	29.6332	90.1758	Confident
C01R02	Q64433	10 kDa heat shock protein, mitochondrial (CH10_MOUSE)	ENSMUSG00000073676	Hspe1	1	GO:0008150, GO:0005623, GO:0005737, GO:0005739, GO:0043167, GO:0051082, GO:0006457, GO:0043226, GO:0005575, GO:0003674, GO:0006950, GO:0005622	cytoplasm, ion binding, biological_process, response to stress, organelle, protein folding, cell, cellular_component, intracellular, unfolded protein binding, mitochondrion, molecular_function	10.9559	100	45.1	45.1	494.299	0.101307	0.778279	0.834608	6.41177	5	5	15	Infinity	100	Confident
C01R02	P00158	Cytochrome b (CYB_MOUSE)		Mt-Cyb		GO:0008150, GO:0006091, GO:0022857, GO:0043167, GO:0048856, GO:0043234, GO:0043226, GO:0005575, GO:0003674, GO:0005622, GO:0006950, GO:0044281, GO:0005623, GO:0005737, GO:0016491, GO:0005739, GO:0034641	biological_process, transmembrane transporter activity, organelle, protein complex, cellular_component, cell, molecular_function, mitochondrion, cytoplasm, ion binding, cellular nitrogen compound metabolic process, generation of precursor metabolites and energy, response to stress, small molecule metabolic process, oxidoreductase activity, anatomical structure development, intracellular	43.1807	24.41	2.36	2.36	104.929	0.0215054	0.145048	0.17717	1.19496	1	1	2	Infinity	100	Doubtful
C01R02	Q9D0M3	Cytochrome c1, heme protein, mitochondrial (CY1_MOUSE)	ENSMUSG00000022551	Cyc1	15	GO:0008150, GO:0006091, GO:0055085, GO:0043167, GO:0043234, GO:0009058, GO:0043226, GO:0005575, GO:0006810, GO:0005622, GO:0003674, GO:0044281, GO:0005623, GO:0005737, GO:0016491, GO:0005739, GO:0034641	biological_process, organelle, transport, protein complex, cellular_component, cell, molecular_function, mitochondrion, cytoplasm, transmembrane transport, ion binding, cellular nitrogen compound metabolic process, generation of precursor metabolites and energy, biosynthetic process, small molecule metabolic process, oxidoreductase activity, intracellular	35.3049	75.08	23.69	18.77	88.9856	0.0182377	0.403004	0.150249	3.3201	7	7	10	Infinity	100	Confident
C01R02	Q9D0L7	Armadillo repeat-containing protein 10 (ARM10_MOUSE)	ENSMUSG00000038525	Armc10	5	GO:0008150, GO:0005623, GO:0008219, GO:0005737, GO:0007165, GO:0005739, GO:0005783, GO:0043226, GO:0005575, GO:0005622, GO:0003674, GO:0040007	cytoplasm, cell death, biological_process, signal transduction, organelle, growth, cell, cellular_component, intracellular, endoplasmic reticulum, mitochondrion, molecular_function	33.2896	76.14	5.56	5.56	20.9408	0.00429185	0.0797752	0.0353579	0.657219	1	1	1	29.6332	90.1758	Doubtful
C01R02	Q9D0K2	Succinyl-CoA:3-ketoacid coenzyme A transferase 1, mitochondrial (SCOT1_MOUSE)	ENSMUSG00000022186	Oxct1	15	GO:0008150, GO:0009056, GO:0007267, GO:0048856, GO:0043226, GO:0005575, GO:0006810, GO:0006950, GO:0005622, GO:0003674, GO:0005654, GO:0044281, GO:0005634, GO:0005623, GO:0005737, GO:0042592, GO:0005739	catabolic process, nucleoplasm, biological_process, cell-cell signaling, organelle, nucleus, transport, cellular_component, cell, molecular_function, mitochondrion, cytoplasm, response to stress, small molecule metabolic process, homeostatic process, anatomical structure development, intracellular	55.953	75	27.31	27.31	50.177	0.0102838	0.449741	0.0847222	3.70514	13	13	22	Infinity	100	Confident
C01R02	O09111	NADH dehydrogenase [ubiquinone] 1 beta subcomplex subunit 11, mitochondrial (NDUBB_MOUSE)	ENSMUSG00000031059	Ndufb11	X	GO:0008150, GO:0065003, GO:0006461, GO:0022607, GO:0043234, GO:0043226, GO:0005575, GO:0005622, GO:0003674, GO:0007005, GO:0005623, GO:0005737, GO:0005739	mitochondrion organization, biological_process, cellular component assembly, organelle, macromolecular complex assembly, protein complex, cellular_component, cell, molecular_function, mitochondrion, cytoplasm, protein complex assembly, intracellular	17.4326	100	17.88	17.88	145.407	0.0298013	0.258925	0.245515	2.13313	2	2	8	Infinity	100	Confident
C01R02	Q9D1G1	Ras-related protein Rab-1B (RAB1B_MOUSE)	ENSMUSG00000024870	Rab1b	19	GO:0008150, GO:0009056, GO:0022607, GO:0043167, GO:0005794, GO:0005783, GO:0043226, GO:0044403, GO:0006810, GO:0005575, GO:0005622, GO:0003674, GO:0005623, GO:0016192, GO:0005737, GO:0006914, GO:0003924, GO:0005739	catabolic process, autophagy, biological_process, cellular component assembly, organelle, gtpase activity, symbiont process, transport, cellular_component, cell, molecular_function, mitochondrion, cytoplasm, ion binding, golgi apparatus, intracellular, endoplasmic reticulum, vesicle-mediated transport	22.1732	100	52.24	52.24	57.9502	0.011877	1.22754	0.0978471	10.113	10	3	16	79.3947	97.2973	Confident
C01R02	Q7TMF3	NADH dehydrogenase [ubiquinone] 1 alpha subcomplex subunit 12 (NDUAC_MOUSE)	ENSMUSG00000020022	Ndufa12	10	GO:0008150, GO:0006091, GO:0043234, GO:0043226, GO:0005575, GO:0003674, GO:0005622, GO:0006950, GO:0044281, GO:0005623, GO:0005737, GO:0016491, GO:0005739, GO:0005829, GO:0034641	biological_process, cytosol, organelle, protein complex, cellular_component, cell, molecular_function, mitochondrion, cytoplasm, cellular nitrogen compound metabolic process, generation of precursor metabolites and energy, response to stress, small molecule metabolic process, oxidoreductase activity, intracellular	17.0756	100	20	20	61.6911	0.0126437	0.412538	0.104164	3.39864	3	3	3	67.3862	96.6019	Confident
C01R02	Q9DBF1	Alpha-aminoadipic semialdehyde dehydrogenase (AL7A1_MOUSE)	ENSMUSG00000053644	Aldh7a1	18	GO:0008150, GO:0009058, GO:0043226, GO:0005575, GO:0003674, GO:0005622, GO:0005623, GO:0005634, GO:0016491, GO:0005737, GO:0005739, GO:0005829, GO:0034641	biological_process, cytosol, organelle, nucleus, cellular_component, cell, molecular_function, mitochondrion, cytoplasm, cellular nitrogen compound metabolic process, biosynthetic process, oxidoreductase activity, intracellular	58.8243	59.55	1.86	1.86	28.1222	0.00576369	0.0444026	0.0474835	0.365805	2	2	3	Infinity	100	Doubtful
C01R02	P18242	Cathepsin D (CATD_MOUSE)	ENSMUSG00000007891	Ctsd	7	GO:0008150, GO:0009056, GO:0022607, GO:0008233, GO:0005576, GO:0043226, GO:0005575, GO:0005773, GO:0005622, GO:0003674, GO:0005764, GO:0005623, GO:0005615, GO:0005737, GO:0006914, GO:0005739, GO:0031410	catabolic process, autophagy, vacuole, biological_process, cellular component assembly, organelle, extracellular region, peptidase activity, cellular_component, cell, molecular_function, mitochondrion, cytoplasm, cytoplasmic vesicle, extracellular space, intracellular, lysosome	44.925	68.05	10.73	10.73	105.595	0.0216418	0.26638	0.178293	2.19454	6	6	13	Infinity	100	Confident
C01R02	Q8JZU2	Tricarboxylate transport protein, mitochondrial (TXTP_MOUSE)	ENSMUSG00000003528	Slc25a1	16	GO:0008150, GO:0005623, GO:0055085, GO:0022857, GO:0005737, GO:0005739, GO:0043226, GO:0005575, GO:0006810, GO:0005622, GO:0003674	cytoplasm, transmembrane transport, biological_process, transmembrane transporter activity, organelle, transport, cell, cellular_component, intracellular, mitochondrion, molecular_function	33.9099	87.46	3.54	3.54	53.8148	0.0110294	0.0577676	0.0908646	0.475912	1	1	7	Infinity	100	Doubtful
C01R02	Q9D172	ES1 protein homolog, mitochondrial (ES1_MOUSE)	ENSMUSG00000053329	D10Jhu81e	10	GO:0008150, GO:0005623, GO:0005737, GO:0005739, GO:0043226, GO:0005575, GO:0005622, GO:0003674	cytoplasm, biological_process, organelle, cell, cellular_component, intracellular, mitochondrion, molecular_function	28.0728	89.47	22.56	22.56	74.9001	0.0153509	0.359356	0.126466	2.96052	4	4	7	Infinity	100	Confident
C01R02	P85094	Isochorismatase domain-containing protein 2A (ISC2A_MOUSE)	ENSMUSG00000086784	Isoc2a	7	GO:0005634, GO:0008150, GO:0005623, GO:0005737, GO:0005739, GO:0043226, GO:0005575, GO:0003674, GO:0005622	cytoplasm, biological_process, organelle, nucleus, cell, cellular_component, intracellular, mitochondrion, molecular_function	22.403	70.87	8.74	8.74	56.407	0.0115607	0.128838	0.0952415	1.06142	2	2	3	Infinity	100	Doubtful
C01R02	Q9Z0X1	Apoptosis-inducing factor 1, mitochondrial (AIFM1_MOUSE)	ENSMUSG00000036932	Aifm1	X	GO:0006461, GO:0009056, GO:0022607, GO:0048856, GO:0043167, GO:0043226, GO:0005575, GO:0003674, GO:0005623, GO:0008219, GO:0016491, GO:0005829, GO:0034641, GO:0008150, GO:0006091, GO:0065003, GO:0007165, GO:0006259, GO:0007005, GO:0005622, GO:0006950, GO:0005634, GO:0003677, GO:0005737, GO:0005739, GO:0030154, GO:0034655	cell differentiation, cellular component assembly, cellular_component, cell, molecular_function, cytoplasm, ion binding, cellular nitrogen compound metabolic process, mitochondrion organization, catabolic process, nucleobase-containing compound catabolic process, cell death, dna metabolic process, cytosol, biological_process, signal transduction, organelle, nucleus, macromolecular complex assembl…	66.7238	82.03	12.91	12.91	53.3472	0.0109336	0.199354	0.0900751	1.64236	9	9	20	Infinity	100	Confident
C01R02	Q91ZZ3	Beta-synuclein (SYUB_MOUSE)	ENSMUSG00000034891	Sncb	13	GO:0005623, GO:0008150, GO:0008219, GO:0005737, GO:0005739, GO:0007267, GO:0043167, GO:0043226, GO:0005575, GO:0003674, GO:0005622	cytoplasm, ion binding, cell death, biological_process, cell-cell signaling, organelle, cell, cellular_component, intracellular, mitochondrion, molecular_function	14.0429	63.16	52.63	52.63	282.827	0.0579657	2.83119	0.477544	23.3244	9	4	15	Infinity	100	Confident
C01R02	P05132	cAMP-dependent protein kinase catalytic subunit alpha (KAPCA_MOUSE)	ENSMUSG00000005469	Prkaca	8	GO:0009790, GO:0009056, GO:0034330, GO:0022607, GO:0043167, GO:0006464, GO:0048856, GO:0005576, GO:0043226, GO:0005575, GO:0003674, GO:0005654, GO:0006913, GO:0005623, GO:0005929, GO:0005829, GO:0031410, GO:0051604, GO:0034641, GO:0008150, GO:0007165, GO:0007267, GO:0048646, GO:0021700, GO:0006397, GO:0043234, GO:0006810, GO:0000003, GO:0005886, GO:0007049, GO:0006950, GO:0005622, GO:0005634, GO:…	nucleoplasm, protein maturation, cell differentiation, cell-cell signaling, cellular component assembly, anatomical structure formation involved in morphogenesis, embryo development, extracellular region, cellular_component, cell, protein complex, molecular_function, developmental maturation, cytoplasm, cilium, ion binding, cellular nitrogen compound metabolic process, mrna processing, homeostati…	40.545	90.88	8.55	8.55	38.7482	0.00794148	0.148154	0.065425	1.22055	5	0	6	32.5967	94.5946	Confident
C01R02	P19783	Cytochrome c oxidase subunit 4 isoform 1, mitochondrial (COX41_MOUSE)	ENSMUSG00000031818	Cox4i1	8	GO:0008150, GO:0006091, GO:0055085, GO:0022857, GO:0043234, GO:0043226, GO:0006810, GO:0005575, GO:0005622, GO:0003674, GO:0044281, GO:0005623, GO:0005634, GO:0016491, GO:0005737, GO:0005739, GO:0034641	biological_process, transmembrane transporter activity, organelle, nucleus, transport, protein complex, cellular_component, cell, molecular_function, mitochondrion, cytoplasm, transmembrane transport, cellular nitrogen compound metabolic process, generation of precursor metabolites and energy, small molecule metabolic process, oxidoreductase activity, intracellular	19.5178	100	40.83	40.83	230.075	0.0471541	0.905461	0.388474	7.45954	7	7	20	Infinity	100	Confident
C01R02	Q9D023	Mitochondrial pyruvate carrier 2 (MPC2_MOUSE)	ENSMUSG00000026568	Mpc2	1	GO:0008150, GO:0055085, GO:0022857, GO:0006790, GO:0007267, GO:0009058, GO:0043226, GO:0006810, GO:0005575, GO:0003674, GO:0005622, GO:0044281, GO:0005623, GO:0005737, GO:0042592, GO:0051186, GO:0005739, GO:0034641	cofactor metabolic process, biological_process, transmembrane transporter activity, cell-cell signaling, organelle, transport, cellular_component, cell, molecular_function, mitochondrion, cytoplasm, transmembrane transport, cellular nitrogen compound metabolic process, biosynthetic process, small molecule metabolic process, sulfur compound metabolic process, homeostatic process, intracellular	14.2766	100	18.11	18.11	96.0474	0.019685	0.333521	0.162173	2.74768	2	2	3	Infinity	100	Confident
C01R02	P50544	Very long-chain specific acyl-CoA dehydrogenase, mitochondrial (ACADV_MOUSE)	ENSMUSG00000018574	Acadvl	11	GO:0008150, GO:0009056, GO:0048856, GO:0043167, GO:0009058, GO:0005730, GO:0043226, GO:0005575, GO:0006950, GO:0005622, GO:0003674, GO:0044281, GO:0005634, GO:0005623, GO:0005737, GO:0016491, GO:0042592, GO:0006629, GO:0005739, GO:0030154, GO:0005829	catabolic process, cell differentiation, biological_process, cytosol, organelle, nucleus, cellular_component, cell, molecular_function, mitochondrion, cytoplasm, ion binding, biosynthetic process, response to stress, small molecule metabolic process, lipid metabolic process, nucleolus, oxidoreductase activity, homeostatic process, anatomical structure development, intracellular	70.8307	100	2.9	2.9	7.43782	0.00152439	0.032045	0.0125585	0.263999	2	2	2	30.1363	92.4837	Doubtful
C01R02	P51881	ADP/ATP translocase 2 (ADT2_MOUSE)	ENSMUSG00000016319	Slc25a5	X	GO:0008283, GO:0008150, GO:0061024, GO:0055085, GO:0022857, GO:0007165, GO:0007059, GO:0043234, GO:0043226, GO:0005576, GO:0005575, GO:0006810, GO:0007005, GO:0005622, GO:0003674, GO:0005623, GO:0005856, GO:0008219, GO:0005737, GO:0005739, GO:0019899	enzyme binding, mitochondrion organization, cell proliferation, cell death, biological_process, transmembrane transporter activity, signal transduction, cytoskeleton, organelle, extracellular region, transport, protein complex, cellular_component, cell, molecular_function, mitochondrion, cytoplasm, transmembrane transport, chromosome segregation, membrane organization, intracellular	32.9102	81.21	41.95	41.95	167.383	0.0343054	1.53958	0.282622	12.6837	19	8	53	Infinity	100	Confident
C01R02	Q91ZR1	Ras-related protein Rab-4B (RAB4B_MOUSE)	ENSMUSG00000053291	Rab4b	7	GO:0008150, GO:0043167, GO:0043226, GO:0005575, GO:0006810, GO:0005622, GO:0005886, GO:0003674, GO:0005623, GO:0016192, GO:0005768, GO:0005737, GO:0003924, GO:0005739, GO:0031410	biological_process, plasma membrane, organelle, gtpase activity, transport, cellular_component, cell, molecular_function, mitochondrion, cytoplasm, ion binding, endosome, cytoplasmic vesicle, intracellular, vesicle-mediated transport	23.614	87.79	11.74	11.74	24.3388	0.00498826	0.202264	0.0410952	1.66633	3	2	3	29.8671	91.6936	Confident
C01R02	P50516	V-type proton ATPase catalytic subunit A (VATA_MOUSE)	ENSMUSG00000052459	Atp6v1a	16	GO:0016887, GO:0008150, GO:0055085, GO:0022857, GO:0043167, GO:0043234, GO:0043226, GO:0005575, GO:0005773, GO:0006810, GO:0003674, GO:0005622, GO:0005886, GO:0005764, GO:0044281, GO:0005623, GO:0005737, GO:0042592, GO:0005739, GO:0005829, GO:0034641	vacuole, biological_process, transmembrane transporter activity, plasma membrane, cytosol, organelle, transport, protein complex, cellular_component, cell, atpase activity, molecular_function, mitochondrion, cytoplasm, transmembrane transport, ion binding, cellular nitrogen compound metabolic process, small molecule metabolic process, homeostatic process, intracellular, lysosome	68.2826	78.44	31.44	31.44	59.2553	0.0121445	0.629751	0.100051	5.18813	16	16	27	Infinity	100	Confident
C01R02	P50518	V-type proton ATPase subunit E 1 (VATE1_MOUSE)	ENSMUSG00000019210	Atp6v1e1	6	GO:0016887, GO:0008150, GO:0055085, GO:0022857, GO:0043234, GO:0043226, GO:0006810, GO:0005575, GO:0005622, GO:0005886, GO:0003674, GO:0005623, GO:0005768, GO:0005737, GO:0005739, GO:0031410, GO:0005829, GO:0019899	enzyme binding, biological_process, transmembrane transporter activity, plasma membrane, cytosol, organelle, transport, protein complex, cellular_component, cell, atpase activity, molecular_function, mitochondrion, cytoplasm, transmembrane transport, endosome, cytoplasmic vesicle, intracellular	26.1408	88.05	29.65	29.65	120.901	0.0247788	0.511775	0.204137	4.2162	7	4	17	Infinity	100	Confident
C01R02	P54071	Isocitrate dehydrogenase [NADP], mitochondrial (IDHP_MOUSE)	ENSMUSG00000030541	Idh2	7	GO:0008283, GO:0008150, GO:0006091, GO:0040011, GO:0048856, GO:0043167, GO:0009058, GO:0043226, GO:0006810, GO:0005575, GO:0003674, GO:0005622, GO:0044281, GO:0048870, GO:0005975, GO:0005623, GO:0005777, GO:0005737, GO:0016491, GO:0051186, GO:0005739, GO:0030154, GO:0005829, GO:0034641	carbohydrate metabolic process, cell differentiation, cofactor metabolic process, cell proliferation, biological_process, cytosol, organelle, locomotion, peroxisome, transport, cellular_component, cell, molecular_function, mitochondrion, cell motility, cytoplasm, ion binding, cellular nitrogen compound metabolic process, generation of precursor metabolites and energy, biosynthetic process, small …	50.8739	84.96	7.52	7.52	40.2365	0.00824653	0.126482	0.0679381	1.04201	6	6	9	Infinity	100	Confident
C01R02	P14824	Annexin A6 (ANXA6_MOUSE)	ENSMUSG00000018340	Anxa6	11	GO:0008150, GO:0055085, GO:0022857, GO:0065003, GO:0006461, GO:0007165, GO:0022607, GO:0043167, GO:0008289, GO:0043226, GO:0006810, GO:0005575, GO:0005773, GO:0005622, GO:0003674, GO:0005764, GO:0005623, GO:0008219, GO:0005768, GO:0005737, GO:0042592, GO:0005739, GO:0005829, GO:0031410	vacuole, cell death, biological_process, transmembrane transporter activity, signal transduction, cytosol, cellular component assembly, organelle, macromolecular complex assembly, transport, cellular_component, cell, lipid binding, molecular_function, mitochondrion, cytoplasm, transmembrane transport, ion binding, endosome, cytoplasmic vesicle, protein complex assembly, homeostatic process, intra…	75.8374	95.39	27.64	27.64	42.6517	0.00874152	0.537493	0.072016	4.42808	17	17	35	Infinity	100	Confident
C01R02	P31324	cAMP-dependent protein kinase type II-beta regulatory subunit (KAP3_MOUSE)	ENSMUSG00000002997	Prkar2b	12	GO:0008150, GO:0006464, GO:0043167, GO:0043226, GO:0005575, GO:0003674, GO:0005886, GO:0005622, GO:0044281, GO:0005623, GO:0005856, GO:0005815, GO:0005737, GO:0006629, GO:0005739, GO:0005929, GO:0030234, GO:0050877, GO:0019899	enzyme binding, nervous system process, biological_process, plasma membrane, cytoskeleton, organelle, cellular_component, cell, molecular_function, mitochondrion, cytoplasm, cilium, ion binding, microtubule organizing center, small molecule metabolic process, enzyme regulator activity, lipid metabolic process, cellular protein modification process, intracellular	46.138	93.51	19.71	19.71	38.5098	0.00789263	0.264855	0.0650225	2.18198	5	5	7	108.62	97.5031	Confident
C01R02	P05063	Fructose-bisphosphate aldolase C (ALDOC_MOUSE)	ENSMUSG00000017390	Aldoc	11	GO:0008150, GO:0006091, GO:0009056, GO:0048856, GO:0016829, GO:0043226, GO:0005575, GO:0005622, GO:0003674, GO:0044281, GO:0005623, GO:0005975, GO:0005737, GO:0005739, GO:0051186, GO:0030154, GO:0034641, GO:0008092	carbohydrate metabolic process, catabolic process, cell differentiation, cofactor metabolic process, biological_process, organelle, cellular_component, cell, molecular_function, mitochondrion, cytoplasm, cellular nitrogen compound metabolic process, generation of precursor metabolites and energy, small molecule metabolic process, lyase activity, cytoskeletal protein binding, anatomical structure …	39.3702	76.58	54.55	54.27	77.6834	0.0159213	1.51189	0.131166	12.4555	17	16	26	Infinity	100	Confident
C01R02	P45952	Medium-chain specific acyl-CoA dehydrogenase, mitochondrial (ACADM_MOUSE)	ENSMUSG00000062908	Acadm	3	GO:0008150, GO:0006091, GO:0009056, GO:0043167, GO:0048856, GO:0009058, GO:0043226, GO:0005575, GO:0006950, GO:0005622, GO:0003674, GO:0005654, GO:0044281, GO:0005975, GO:0005623, GO:0005634, GO:0016491, GO:0005737, GO:0006629, GO:0005739, GO:0030154, GO:0034641	carbohydrate metabolic process, catabolic process, nucleoplasm, cell differentiation, biological_process, organelle, nucleus, cellular_component, cell, molecular_function, mitochondrion, cytoplasm, ion binding, cellular nitrogen compound metabolic process, generation of precursor metabolites and energy, biosynthetic process, response to stress, small molecule metabolic process, lipid metabolic pr…	46.4516	77.91	1.9	1.9	14.8756	0.00304878	0.0435626	0.025117	0.358886	1	1	1	29.6332	90.1758	Doubtful
C01R02	Q9D051	Pyruvate dehydrogenase E1 component subunit beta, mitochondrial (ODPB_MOUSE)	ENSMUSG00000021748	Pdhb	14	GO:0008150, GO:0006091, GO:0006790, GO:0009058, GO:0043226, GO:0005575, GO:0003674, GO:0005622, GO:0005654, GO:0044281, GO:0005634, GO:0005623, GO:0005975, GO:0005737, GO:0016491, GO:0051186, GO:0005739, GO:0034641	carbohydrate metabolic process, nucleoplasm, cofactor metabolic process, biological_process, organelle, nucleus, cellular_component, cell, molecular_function, mitochondrion, cytoplasm, cellular nitrogen compound metabolic process, generation of precursor metabolites and energy, biosynthetic process, small molecule metabolic process, sulfur compound metabolic process, oxidoreductase activity, intr…	38.912	64.07	23.12	23.12	66.4158	0.013612	0.483982	0.112141	3.98723	7	7	18	Infinity	100	Confident
C01R02	P62259	14-3-3 protein epsilon (1433E_MOUSE)	ENSMUSG00000020849	Ywhae	11	GO:0040011, GO:0043167, GO:0048856, GO:0006464, GO:0043226, GO:0005575, GO:0003674, GO:0005623, GO:0006913, GO:0016491, GO:0031410, GO:0005829, GO:0008150, GO:0055085, GO:0007165, GO:0043234, GO:0006810, GO:0006950, GO:0005886, GO:0005622, GO:0048870, GO:0005634, GO:0006605, GO:0005856, GO:0005737, GO:0042592, GO:0005739, GO:0030154, GO:0019899	cell differentiation, locomotion, cellular_component, cell, protein complex, molecular_function, cytoplasm, ion binding, protein targeting, homeostatic process, enzyme binding, cytosol, biological_process, signal transduction, plasma membrane, cytoskeleton, organelle, nucleus, transport, mitochondrion, cell motility, transmembrane transport, cytoplasmic vesicle, response to stress, nucleocytoplas…	29.1554	100	47.45	47.45	165.063	0.0338299	1.31013	0.278704	10.7934	13	10	28	Infinity	100	Confident
C01R02	Q9ESW4	Acylglycerol kinase, mitochondrial (AGK_MOUSE)	ENSMUSG00000029916	Agk	6	GO:0061024, GO:0008150, GO:0055085, GO:0043167, GO:0009058, GO:0043234, GO:0043226, GO:0005575, GO:0006810, GO:0005622, GO:0007005, GO:0003674, GO:0005623, GO:0006605, GO:0005737, GO:0005739, GO:0006629, GO:0034641, GO:0016301	mitochondrion organization, biological_process, organelle, transport, protein complex, cellular_component, cell, molecular_function, mitochondrion, cytoplasm, transmembrane transport, ion binding, cellular nitrogen compound metabolic process, biosynthetic process, kinase activity, membrane organization, lipid metabolic process, protein targeting, intracellular	46.9463	83.85	2.14	2.14	12.7728	0.0026178	0.0461834	0.0215665	0.380477	1	1	1	29.6332	90.1758	Doubtful
C01R02	P03888	NADH-ubiquinone oxidoreductase chain 1 (NU1M_MOUSE)		Mtnd1		GO:0005623, GO:0008150, GO:0006091, GO:0016491, GO:0005737, GO:0005739, GO:0043234, GO:0043226, GO:0005575, GO:0003674, GO:0006950, GO:0005622	cytoplasm, generation of precursor metabolites and energy, biological_process, response to stress, organelle, oxidoreductase activity, cell, protein complex, cellular_component, intracellular, mitochondrion, molecular_function	36.035	25.79	2.52	2.52	88.7129	0.0181818	0.178769	0.149789	1.47277	1	1	4	Infinity	100	Doubtful
C01R02	Q3UUI3	Acyl-coenzyme A thioesterase THEM4 (THEM4_MOUSE)	ENSMUSG00000028145	Them4	3	GO:0061024, GO:0008150, GO:0007165, GO:0043226, GO:0044403, GO:0006810, GO:0005575, GO:0003674, GO:0007005, GO:0005886, GO:0005622, GO:0044281, GO:0005623, GO:0008219, GO:0005737, GO:0006629, GO:0005739, GO:0005829	mitochondrion organization, cell death, biological_process, signal transduction, plasma membrane, cytosol, organelle, symbiont process, transport, cellular_component, cell, molecular_function, mitochondrion, cytoplasm, membrane organization, small molecule metabolic process, lipid metabolic process, intracellular	26.0146	77.83	15.65	15.65	63.6023	0.0130354	0.240938	0.107391	1.98494	5	5	6	Infinity	100	Confident
C01R02	Q4VAE3	Transmembrane protein 65 (TMM65_MOUSE)	ENSMUSG00000062373	Tmem65	15	GO:0005623, GO:0008150, GO:0005737, GO:0005739, GO:0048856, GO:0043226, GO:0005575, GO:0003013, GO:0003674, GO:0005622, GO:0005886	cytoplasm, circulatory system process, biological_process, plasma membrane, organelle, cell, anatomical structure development, cellular_component, intracellular, mitochondrion, molecular_function	24.9021	59.83	4.7	4.7	29.3928	0.0060241	0.122018	0.0496288	1.00524	1	1	1	29.6332	90.1758	Doubtful
C01R02	Q91YT0	NADH dehydrogenase [ubiquinone] flavoprotein 1, mitochondrial (NDUV1_MOUSE)	ENSMUSG00000037916	Ndufv1	19	GO:0008150, GO:0006091, GO:0043167, GO:0043234, GO:0043226, GO:0005575, GO:0003674, GO:0005622, GO:0044281, GO:0005623, GO:0005737, GO:0016491, GO:0005739, GO:0005829, GO:0034641	biological_process, cytosol, organelle, protein complex, cellular_component, cell, molecular_function, mitochondrion, cytoplasm, ion binding, cellular nitrogen compound metabolic process, generation of precursor metabolites and energy, small molecule metabolic process, oxidoreductase activity, intracellular	50.8017	80.82	11.85	11.85	93.5558	0.0191744	0.237635	0.157966	1.95773	6	6	14	Infinity	100	Confident
C01R02	Q78IK2	Up-regulated during skeletal muscle growth protein 5 (USMG5_MOUSE)	ENSMUSG00000071528	Usmg5	19	GO:0005623, GO:0008150, GO:0005737, GO:0005739, GO:0043234, GO:0043226, GO:0005575, GO:0003674, GO:0005622	cytoplasm, biological_process, organelle, cell, protein complex, cellular_component, intracellular, mitochondrion, molecular_function	6.37736	100	25.86	25.86	84.1243	0.0172414	0.333521	0.142041	2.74768	1	1	1	29.6332	90.1758	Doubtful
C01R02	P56382	ATP synthase subunit epsilon, mitochondrial (ATP5E_MOUSE)	ENSMUSG00000016252	Atp5e	2	GO:0016887, GO:0008150, GO:0055085, GO:0022857, GO:0043234, GO:0009058, GO:0043226, GO:0005575, GO:0006810, GO:0003674, GO:0005622, GO:0044281, GO:0005623, GO:0005737, GO:0005739, GO:0034641	biological_process, transmembrane transporter activity, organelle, transport, protein complex, cellular_component, cell, atpase activity, molecular_function, mitochondrion, cytoplasm, transmembrane transport, cellular nitrogen compound metabolic process, biosynthetic process, small molecule metabolic process, intracellular	5.83415	100	15.38	15.38	187.662	0.0384615	0.211528	0.316861	1.74265	1	1	2	Infinity	100	Doubtful
C01R02	Q02053	Ubiquitin-like modifier-activating enzyme 1 (UBA1_MOUSE)	ENSMUSG00000001924	Uba1	X	GO:0008150, GO:0009056, GO:0043167, GO:0006464, GO:0005783, GO:0005694, GO:0043226, GO:0005575, GO:0005773, GO:0005622, GO:0006950, GO:0003674, GO:0005764, GO:0005654, GO:0005623, GO:0005634, GO:0005768, GO:0005737, GO:0005739, GO:0005829, GO:0031410, GO:0016874	catabolic process, nucleoplasm, vacuole, biological_process, cytosol, organelle, chromosome, nucleus, cellular_component, cell, molecular_function, mitochondrion, cytoplasm, ion binding, endosome, cytoplasmic vesicle, response to stress, ligase activity, cellular protein modification process, intracellular, lysosome, endoplasmic reticulum	117.734	75.8	21.17	21.17	36.4211	0.00746456	0.39905	0.0614959	3.28753	18	18	35	Infinity	100	Confident
C01R02	Q8CAQ8	MICOS complex subunit Mic60 (MIC60_MOUSE)	ENSMUSG00000052337	Immt	6	GO:0005623, GO:0061024, GO:0008150, GO:0005737, GO:0042592, GO:0005739, GO:0043234, GO:0043226, GO:0005575, GO:0005622, GO:0007005, GO:0003674	cytoplasm, mitochondrion organization, biological_process, membrane organization, organelle, homeostatic process, cell, protein complex, cellular_component, intracellular, mitochondrion, molecular_function	83.8482	95.11	5.94	5.94	12.4239	0.0025463	0.0754221	0.0209774	0.621356	6	6	7	Infinity	100	Confident
C01R02	P61028	Ras-related protein Rab-8B (RAB8B_MOUSE)	ENSMUSG00000036943	Rab8b	9	GO:0034330, GO:0043167, GO:0043226, GO:0005575, GO:0003674, GO:0005654, GO:0005623, GO:0007009, GO:0005768, GO:0016192, GO:0003924, GO:0031410, GO:0061024, GO:0008150, GO:0055085, GO:0007267, GO:0006810, GO:0005886, GO:0005622, GO:0002376, GO:0005777, GO:0005634, GO:0006605, GO:0005737, GO:0005739	nucleoplasm, cell-cell signaling, gtpase activity, cellular_component, cell, molecular_function, cytoplasm, plasma membrane organization, ion binding, endosome, membrane organization, protein targeting, immune system process, biological_process, plasma membrane, organelle, peroxisome, nucleus, transport, mitochondrion, transmembrane transport, cytoplasmic vesicle, cell junction organization, intr…	23.5881	100	25.12	25.12	113.898	0.0233435	0.403004	0.192313	3.3201	6	1	14	Infinity	100	Confident
C01R02	Q64133	Amine oxidase [flavin-containing] A (AOFA_MOUSE)	ENSMUSG00000025037	Maoa	X	GO:0005623, GO:0008150, GO:0016491, GO:0009056, GO:0005737, GO:0005739, GO:0043226, GO:0005575, GO:0003674, GO:0005622	cytoplasm, catabolic process, biological_process, organelle, oxidoreductase activity, cell, cellular_component, intracellular, mitochondrion, molecular_function	59.5637	71.67	9.51	9.51	35.8275	0.0073429	0.157423	0.0604936	1.29691	7	6	10	Infinity	100	Confident
C01R02	Q9ERS2	NADH dehydrogenase [ubiquinone] 1 alpha subcomplex subunit 13 (NDUAD_MOUSE)	ENSMUSG00000036199	Ndufa13	8	GO:0009056, GO:0006461, GO:0022607, GO:0043167, GO:0009058, GO:0043226, GO:0005575, GO:0003674, GO:0005654, GO:0005623, GO:0008219, GO:0016491, GO:0034641, GO:0061024, GO:0008150, GO:0055085, GO:0065003, GO:0007165, GO:0043234, GO:0006810, GO:0040007, GO:0005622, GO:0007005, GO:0005634, GO:0006605, GO:0005737, GO:0005739	nucleoplasm, cellular component assembly, cellular_component, cell, protein complex, molecular_function, cytoplasm, ion binding, cellular nitrogen compound metabolic process, biosynthetic process, membrane organization, protein targeting, mitochondrion organization, catabolic process, cell death, biological_process, signal transduction, organelle, nucleus, macromolecular complex assembly, transpo…	16.8486	100	13.89	13.89	67.7668	0.0138889	0.232847	0.114422	1.91828	2	2	3	Infinity	100	Confident
C01R02	P38647	Stress-70 protein, mitochondrial (GRP75_MOUSE)	ENSMUSG00000024359	Hspa9	18	GO:0022607, GO:0048856, GO:0043167, GO:0009058, GO:0005730, GO:0043226, GO:0005576, GO:0005575, GO:0003674, GO:0006913, GO:0005623, GO:0051186, GO:0008150, GO:0006790, GO:0051082, GO:0006457, GO:0006810, GO:0005622, GO:0002376, GO:0005634, GO:0005737, GO:0042592, GO:0005739, GO:0030154, GO:0019899	cell differentiation, cellular component assembly, extracellular region, cellular_component, cell, molecular_function, cytoplasm, ion binding, biosynthetic process, nucleolus, sulfur compound metabolic process, protein folding, immune system process, homeostatic process, unfolded protein binding, enzyme binding, cofactor metabolic process, biological_process, organelle, nucleus, transport, mitoch…	73.4156	93.08	31.66	31.66	49.0192	0.0100465	0.568203	0.0827673	4.68108	19	18	33	Infinity	100	Confident
C01R02	P26638	Serine--tRNA ligase, cytoplasmic (SYSC_MOUSE)	ENSMUSG00000068739	Sars	3	GO:0008150, GO:0048856, GO:0043167, GO:0006520, GO:0006399, GO:0048646, GO:0009058, GO:0043226, GO:0005575, GO:0003674, GO:0005622, GO:0006412, GO:0044281, GO:0005634, GO:0003677, GO:0005623, GO:0005737, GO:0005739, GO:0005829, GO:0034641, GO:0016874	trna metabolic process, cellular amino acid metabolic process, biological_process, cytosol, organelle, anatomical structure formation involved in morphogenesis, nucleus, cellular_component, cell, molecular_function, mitochondrion, cytoplasm, ion binding, cellular nitrogen compound metabolic process, biosynthetic process, small molecule metabolic process, translation, dna binding, ligase activity,…	58.3517	86.91	2.54	2.54	10.3155	0.00211416	0.0316052	0.0174173	0.260376	2	2	2	30.1226	92.3996	Doubtful
C01R02	Q9QUH0	Glutaredoxin-1 (GLRX1_MOUSE)	ENSMUSG00000021591	Glrx	13	GO:0008150, GO:0006091, GO:0055085, GO:0043226, GO:0006810, GO:0005575, GO:0003674, GO:0005622, GO:0005623, GO:0005634, GO:0016491, GO:0005737, GO:0042592, GO:0005739	biological_process, organelle, nucleus, transport, cellular_component, cell, molecular_function, mitochondrion, cytoplasm, transmembrane transport, generation of precursor metabolites and energy, oxidoreductase activity, homeostatic process, intracellular	11.8631	72.9	27.1	27.1	45.6001	0.00934579	0.232847	0.0769943	1.91828	1	1	1	Infinity	100	Doubtful
C01R02	Q9QUI0	Transforming protein RhoA (RHOA_MOUSE)	ENSMUSG00000007815	Rhoa	9	GO:0007010, GO:0022607, GO:0043226, GO:0003013, GO:0044281, GO:0005623, GO:0008219, GO:0003924, GO:0005829, GO:0008150, GO:0006091, GO:0065003, GO:0000902, GO:0048646, GO:0021700, GO:0006810, GO:0002376, GO:0040007, GO:0005886, GO:0006412, GO:0005634, GO:0008283, GO:0040011, GO:0006461, GO:0034330, GO:0043167, GO:0006464, GO:0048856, GO:0007155, GO:0009058, GO:0005575, GO:0003674, GO:0000278, GO:…	cellular component assembly, anatomical structure formation involved in morphogenesis, mitotic cell cycle, molecular_function, cell morphogenesis, mitotic nuclear division, immune system process, signal transduction, cytoskeleton, organelle, cell division, macromolecular complex assembly, mitochondrion, circulatory system process, cell motility, generation of precursor metabolites and energy, res…	21.7681	84.46	15.03	15.03	53.0898	0.0108808	0.279802	0.0896405	2.30512	5	3	7	Infinity	100	Confident
C01R02	P56480	ATP synthase subunit beta, mitochondrial (ATPB_MOUSE)	ENSMUSG00000025393	Atp5b	10	GO:0016887, GO:0040011, GO:0043167, GO:0048856, GO:0007155, GO:0009058, GO:0005576, GO:0043226, GO:0005575, GO:0003674, GO:0044281, GO:0005623, GO:0034641, GO:0008150, GO:0055085, GO:0022857, GO:0048646, GO:0043234, GO:0006810, GO:0005622, GO:0005886, GO:0048870, GO:0005737, GO:0042592, GO:0006629, GO:0005739	transmembrane transporter activity, locomotion, anatomical structure formation involved in morphogenesis, extracellular region, cellular_component, cell, protein complex, molecular_function, cytoplasm, ion binding, cellular nitrogen compound metabolic process, biosynthetic process, cell adhesion, homeostatic process, biological_process, plasma membrane, organelle, transport, atpase activity, mito…	56.2655	76.94	69.57	69.57	122.878	0.025184	4.17947	0.207476	34.4321	37	37	121	Infinity	100	Confident
C01R02	P03921	NADH-ubiquinone oxidoreductase chain 5 (NU5M_MOUSE)		Mtnd5		GO:0008150, GO:0006091, GO:0043234, GO:0043226, GO:0005575, GO:0005622, GO:0003674, GO:0044281, GO:0005623, GO:0005737, GO:0016491, GO:0005739, GO:0034641	biological_process, organelle, protein complex, cellular_component, cell, molecular_function, mitochondrion, cytoplasm, cellular nitrogen compound metabolic process, generation of precursor metabolites and energy, small molecule metabolic process, oxidoreductase activity, intracellular	68.4288	35.58	2.14	2.14	18.0045	0.00369004	0.0746078	0.0304	0.614648	1	1	1	29.6332	90.1758	Doubtful
C01R02	P03930	ATP synthase protein 8 (ATP8_MOUSE)		Mtatp8		GO:0008150, GO:0055085, GO:0022857, GO:0043234, GO:0009058, GO:0043226, GO:0005575, GO:0006810, GO:0005622, GO:0003674, GO:0044281, GO:0005623, GO:0016491, GO:0005737, GO:0005739, GO:0034641	biological_process, transmembrane transporter activity, organelle, transport, protein complex, cellular_component, cell, molecular_function, mitochondrion, cytoplasm, transmembrane transport, cellular nitrogen compound metabolic process, biosynthetic process, small molecule metabolic process, oxidoreductase activity, intracellular	7.76119	61.19	14.93	14.93	72.824	0.0149254	0.389495	0.122961	3.20882	1	1	1	29.6332	90.1758	Doubtful
C01R02	Q03265	ATP synthase subunit alpha, mitochondrial (ATPA_MOUSE)	ENSMUSG00000116276	Atp5a1	CHR_MG3700_PATCH	GO:0008283, GO:0016887, GO:0008150, GO:0055085, GO:0022857, GO:0040011, GO:0043167, GO:0009058, GO:0043234, GO:0005576, GO:0043226, GO:0006810, GO:0005575, GO:0003674, GO:0005622, GO:0005886, GO:0044281, GO:0048870, GO:0005623, GO:0005634, GO:0005737, GO:0006629, GO:0005739, GO:0034641	cell proliferation, biological_process, transmembrane transporter activity, plasma membrane, organelle, locomotion, extracellular region, nucleus, transport, protein complex, cellular_component, cell, atpase activity, molecular_function, mitochondrion, cell motility, cytoplasm, transmembrane transport, ion binding, cellular nitrogen compound metabolic process, biosynthetic process, small molecule…	59.7156	85.71	44.67	44.67	141.698	0.0290412	1.03621	0.239253	8.53674	26	26	81	Infinity	100	Confident
C01R02	P06151	L-lactate dehydrogenase A chain (LDHA_MOUSE)	ENSMUSG00000063229	Ldha	7	GO:0008150, GO:0006091, GO:0009056, GO:0009058, GO:0043226, GO:0005575, GO:0005622, GO:0003674, GO:0044281, GO:0005975, GO:0005623, GO:0016491, GO:0005737, GO:0051186, GO:0005739, GO:0005929, GO:0005829, GO:0034641	carbohydrate metabolic process, catabolic process, cofactor metabolic process, biological_process, cytosol, organelle, cellular_component, cell, molecular_function, mitochondrion, cytoplasm, cilium, cellular nitrogen compound metabolic process, generation of precursor metabolites and energy, biosynthetic process, small molecule metabolic process, oxidoreductase activity, intracellular	36.4752	81.33	36.14	36.14	65.6415	0.0134533	0.832981	0.110834	6.86242	11	10	14	Infinity	100	Confident
C01R02	P18760	Cofilin-1 (COF1_MOUSE)	ENSMUSG00000056201	Cfl1	19	GO:0009790, GO:0007010, GO:0040011, GO:0006461, GO:0034330, GO:0022607, GO:0043167, GO:0006464, GO:0048856, GO:0008289, GO:0007155, GO:0005576, GO:0043226, GO:0005575, GO:0003674, GO:0000278, GO:0051301, GO:0005623, GO:0006913, GO:0005829, GO:0008150, GO:0055085, GO:0065003, GO:0007165, GO:0000902, GO:0007267, GO:0048646, GO:0044403, GO:0006810, GO:0005622, GO:0040007, GO:0005886, GO:0007049, GO:…	cell differentiation, cell-cell signaling, cellular component assembly, locomotion, anatomical structure formation involved in morphogenesis, embryo development, extracellular region, mitotic cell cycle, cellular_component, cell, molecular_function, cytoplasm, ion binding, cell adhesion, cell morphogenesis, extracellular space, cytoskeletal protein binding, enzyme binding, cytoskeleton organizati…	18.5477	100	49.4	49.4	177.407	0.0363597	0.743329	0.299546	6.12383	9	9	27	Infinity	100	Confident
C01R02	Q920E5	Farnesyl pyrophosphate synthase (FPPS_MOUSE)	ENSMUSG00000059743	Fdps	3	GO:0008150, GO:0043167, GO:0009058, GO:0043226, GO:0005575, GO:0005622, GO:0003674, GO:0005654, GO:0044281, GO:0005623, GO:0005634, GO:0005737, GO:0005739, GO:0006629, GO:0005829, GO:0016765	nucleoplasm, biological_process, cytosol, organelle, nucleus, transferase activity, transferring alkyl or aryl (other than methyl) groups, cellular_component, cell, molecular_function, mitochondrion, cytoplasm, ion binding, biosynthetic process, small molecule metabolic process, lipid metabolic process, intracellular	40.5557	65.44	8.22	8.22	54.3861	0.0111465	0.122018	0.0918292	1.00524	2	2	5	Infinity	100	Confident
C01R02	P16125	L-lactate dehydrogenase B chain (LDHB_MOUSE)	ENSMUSG00000030246	Ldhb	6	GO:0008150, GO:0009058, GO:0043226, GO:0005575, GO:0003674, GO:0005622, GO:0044281, GO:0005623, GO:0005975, GO:0005737, GO:0016491, GO:0051186, GO:0005739, GO:0005829, GO:0034641, GO:0019899	carbohydrate metabolic process, enzyme binding, cofactor metabolic process, biological_process, cytosol, organelle, cellular_component, cell, molecular_function, mitochondrion, cytoplasm, cellular nitrogen compound metabolic process, biosynthetic process, small molecule metabolic process, oxidoreductase activity, intracellular	36.549	84.73	42.81	42.81	144.717	0.0296599	1.6827	0.24435	13.8627	16	15	37	Infinity	100	Confident
C01R02	Q8BW75	Amine oxidase [flavin-containing] B (AOFB_MOUSE)	ENSMUSG00000040147	Maob	X	GO:0008150, GO:0009056, GO:0043167, GO:0043226, GO:0005575, GO:0006810, GO:0005622, GO:0003674, GO:0005623, GO:0016491, GO:0005737, GO:0005739, GO:0034641	catabolic process, biological_process, organelle, transport, cellular_component, cell, molecular_function, mitochondrion, cytoplasm, ion binding, cellular nitrogen compound metabolic process, oxidoreductase activity, intracellular	58.5204	76.73	11.35	11.35	18.5971	0.0038115	0.119903	0.0314007	0.987806	6	5	7	62.3317	96.6102	Confident
C01R02	P62897	Cytochrome c, somatic (CYC_MOUSE)	ENSMUSG00000063694	Cycs	6	GO:0008150, GO:0006091, GO:0043167, GO:0043226, GO:0005575, GO:0003674, GO:0005622, GO:0044281, GO:0005623, GO:0005634, GO:0008219, GO:0016491, GO:0005737, GO:0051186, GO:0005739, GO:0005829, GO:0034641	cofactor metabolic process, cell death, biological_process, cytosol, organelle, nucleus, cellular_component, cell, molecular_function, mitochondrion, cytoplasm, ion binding, cellular nitrogen compound metabolic process, generation of precursor metabolites and energy, small molecule metabolic process, oxidoreductase activity, intracellular	11.598	100	49.52	49.52	231.569	0.0474603	0.930698	0.390997	7.66745	7	7	14	Infinity	100	Confident
C01R02	Q8CHT0	Delta-1-pyrroline-5-carboxylate dehydrogenase, mitochondrial (AL4A1_MOUSE)	ENSMUSG00000028737	Aldh4a1	4	GO:0044281, GO:0005623, GO:0008150, GO:0009056, GO:0005737, GO:0016491, GO:0005739, GO:0006520, GO:0043226, GO:0005575, GO:0003674, GO:0005622	cytoplasm, catabolic process, cellular amino acid metabolic process, biological_process, small molecule metabolic process, organelle, oxidoreductase activity, cell, cellular_component, intracellular, mitochondrion, molecular_function	61.8015	72.95	8.01	8.01	25.9335	0.00531511	0.12421	0.0437879	1.02329	5	5	7	Infinity	100	Confident
C01R02	Q06185	ATP synthase subunit e, mitochondrial (ATP5I_MOUSE)		Atp5i		GO:0016887, GO:0008150, GO:0055085, GO:0022857, GO:0043234, GO:0009058, GO:0043226, GO:0006810, GO:0005575, GO:0005622, GO:0003674, GO:0044281, GO:0005623, GO:0005737, GO:0005739, GO:0034641	biological_process, transmembrane transporter activity, organelle, transport, protein complex, cellular_component, cell, atpase activity, molecular_function, mitochondrion, cytoplasm, transmembrane transport, cellular nitrogen compound metabolic process, biosynthetic process, small molecule metabolic process, intracellular	8.23047	100	50.7	50.7	377.967	0.0774648	0.637894	0.638185	5.25522	3	3	9	Infinity	100	Confident
C01R02	Q8BFR5	Elongation factor Tu, mitochondrial (EFTU_MOUSE)	ENSMUSG00000073838	Tufm	7	GO:0008150, GO:0043167, GO:0008135, GO:0009058, GO:0043226, GO:0005575, GO:0003674, GO:0005622, GO:0006412, GO:0005623, GO:0003723, GO:0005737, GO:0003924, GO:0005739, GO:0034641	biological_process, organelle, gtpase activity, cellular_component, cell, rna binding, molecular_function, mitochondrion, cytoplasm, ion binding, cellular nitrogen compound metabolic process, translation factor activity, rna binding, biosynthetic process, translation, intracellular	49.477	94.03	3.1	3.1	53.9735	0.0110619	0.0444026	0.0911326	0.365805	1	1	5	Infinity	100	Doubtful
C01R02	Q8BWT1	3-ketoacyl-CoA thiolase, mitochondrial (THIM_MOUSE)	ENSMUSG00000036880	Acaa2	18	GO:0008150, GO:0061024, GO:0016746, GO:0007165, GO:0009056, GO:0043226, GO:0006810, GO:0005575, GO:0003674, GO:0006950, GO:0007005, GO:0005622, GO:0044281, GO:0005623, GO:0008219, GO:0005737, GO:0006629, GO:0005739	mitochondrion organization, catabolic process, cell death, biological_process, signal transduction, organelle, transferase activity, transferring acyl groups, transport, cellular_component, cell, molecular_function, mitochondrion, cytoplasm, response to stress, membrane organization, small molecule metabolic process, lipid metabolic process, intracellular	41.8034	79.6	10.08	10.08	18.4353	0.00377834	0.118872	0.0311274	0.979315	3	3	4	52.6228	95.8968	Confident
C01R02	Q8BWF0	Succinate-semialdehyde dehydrogenase, mitochondrial (SSDH_MOUSE)	ENSMUSG00000035936	Aldh5a1	13	GO:0008150, GO:0006091, GO:0006790, GO:0065003, GO:0009056, GO:0006461, GO:0022607, GO:0048856, GO:0006520, GO:0043226, GO:0005575, GO:0005622, GO:0003674, GO:0044281, GO:0005623, GO:0005975, GO:0016491, GO:0005737, GO:0005739, GO:0051186, GO:0006629, GO:0034641	carbohydrate metabolic process, catabolic process, cellular amino acid metabolic process, cofactor metabolic process, biological_process, cellular component assembly, organelle, macromolecular complex assembly, cellular_component, cell, molecular_function, mitochondrion, cytoplasm, cellular nitrogen compound metabolic process, generation of precursor metabolites and energy, small molecule metabol…	55.9328	74.38	25.05	25.05	80.9459	0.01659	0.519911	0.136675	4.28323	13	13	35	Infinity	100	Confident
C01R02	Q7TQD2	Tubulin polymerization-promoting protein (TPPP_MOUSE)	ENSMUSG00000021573	Tppp	13	GO:0008150, GO:0007010, GO:0065003, GO:0006461, GO:0022607, GO:0043226, GO:0005575, GO:0003674, GO:0005622, GO:0005634, GO:0005623, GO:0005856, GO:0005737, GO:0005739, GO:0005829, GO:0008092	cytoskeleton organization, biological_process, cytoskeleton, cytosol, cellular component assembly, organelle, nucleus, macromolecular complex assembly, cellular_component, cell, molecular_function, mitochondrion, cytoplasm, protein complex assembly, cytoskeletal protein binding, intracellular	23.5601	88.07	38.07	38.07	175.536	0.0359764	0.511775	0.296388	4.2162	8	8	15	Infinity	100	Confident
C01R02	Q3UIU2	NADH dehydrogenase [ubiquinone] 1 beta subcomplex subunit 6 (NDUB6_MOUSE)	ENSMUSG00000071014	Ndufb6	4	GO:0008150, GO:0006091, GO:0065003, GO:0006461, GO:0022607, GO:0043234, GO:0043226, GO:0005575, GO:0005622, GO:0007005, GO:0005654, GO:0044281, GO:0005634, GO:0005623, GO:0005737, GO:0005739, GO:0034641	mitochondrion organization, nucleoplasm, biological_process, cellular component assembly, organelle, nucleus, macromolecular complex assembly, protein complex, cellular_component, cell, mitochondrion, cytoplasm, cellular nitrogen compound metabolic process, generation of precursor metabolites and energy, small molecule metabolic process, protein complex assembly, intracellular	15.505	100	14.06	14.06	190.594	0.0390625	0.128838	0.321812	1.06142	1	1	5	Infinity	100	Doubtful
C01R02	P06801	NADP-dependent malic enzyme (MAOX_MOUSE)	ENSMUSG00000032418	Me1	9	GO:0008150, GO:0065003, GO:0006461, GO:0022607, GO:0043167, GO:0016829, GO:0043226, GO:0005575, GO:0005622, GO:0003674, GO:0044281, GO:0005623, GO:0005737, GO:0016491, GO:0005739, GO:0051186, GO:0005829, GO:0034641	cofactor metabolic process, biological_process, cytosol, cellular component assembly, organelle, macromolecular complex assembly, cellular_component, cell, molecular_function, mitochondrion, cytoplasm, ion binding, cellular nitrogen compound metabolic process, small molecule metabolic process, lyase activity, protein complex assembly, oxidoreductase activity, intracellular	63.9131	80.07	3.15	3.15	9.01887	0.00184843	0.0360593	0.0152281	0.297071	1	1	1	29.6332	90.1758	Doubtful
C01R02	P67778	Prohibitin (PHB_MOUSE)	ENSMUSG00000038845	Phb	11	GO:0008283, GO:0009056, GO:0006464, GO:0048856, GO:0009058, GO:0043226, GO:0005575, GO:0003674, GO:0005654, GO:0005623, GO:0003700, GO:0005768, GO:0008219, GO:0031410, GO:0051604, GO:0034641, GO:0008150, GO:0007165, GO:0006259, GO:0005886, GO:0005622, GO:0000003, GO:0040007, GO:0002376, GO:0006950, GO:0007005, GO:0005634, GO:0003677, GO:0051276, GO:0005737, GO:0005739, GO:0019899	nucleoplasm, protein maturation, cellular_component, cell, molecular_function, cytoplasm, endosome, cellular nitrogen compound metabolic process, biosynthetic process, immune system process, enzyme binding, mitochondrion organization, catabolic process, chromosome organization, cell proliferation, cell death, dna metabolic process, biological_process, signal transduction, plasma membrane, organel…	29.8019	90.07	41.54	41.54	156.882	0.0321531	1.04336	0.264889	8.5956	10	10	20	Infinity	100	Confident
C01R02	Q2NL51	Glycogen synthase kinase-3 alpha (GSK3A_MOUSE)	ENSMUSG00000057177	Gsk3a	7	GO:0009056, GO:0040011, GO:0043167, GO:0006464, GO:0048856, GO:0009058, GO:0043226, GO:0005575, GO:0003013, GO:0003674, GO:0005623, GO:0008219, GO:0006914, GO:0034641, GO:0008150, GO:0061024, GO:0006091, GO:0007165, GO:0007267, GO:0006259, GO:0007568, GO:0006810, GO:0005622, GO:0007005, GO:0040007, GO:0048870, GO:0005975, GO:0006605, GO:0005856, GO:0005737, GO:0005739, GO:0030154, GO:0016301, GO:…	carbohydrate metabolic process, cell differentiation, cell-cell signaling, locomotion, cellular_component, cell, molecular_function, cytoplasm, ion binding, cellular nitrogen compound metabolic process, biosynthetic process, membrane organization, protein targeting, enzyme binding, mitochondrion organization, catabolic process, autophagy, cell death, dna metabolic process, biological_process, sig…	51.6284	58.37	2.86	2.86	17.0602	0.0034965	0.0502111	0.0288056	0.413658	1	1	1	29.6332	90.1758	Doubtful
C01R02	P31786	Acyl-CoA-binding protein (ACBP_MOUSE)	ENSMUSG00000026385	Dbi	1	GO:0008150, GO:0048856, GO:0007267, GO:0043167, GO:0005794, GO:0005783, GO:0008289, GO:0043226, GO:0005576, GO:0005575, GO:0005622, GO:0006950, GO:0003674, GO:0005623, GO:0005615, GO:0005737, GO:0005739, GO:0006629, GO:0031410, GO:0050877	nervous system process, biological_process, cell-cell signaling, organelle, extracellular region, cellular_component, cell, lipid binding, molecular_function, mitochondrion, cytoplasm, ion binding, cytoplasmic vesicle, response to stress, lipid metabolic process, golgi apparatus, extracellular space, anatomical structure development, intracellular, endoplasmic reticulum	9.99414	100	39.08	39.08	317.803	0.0651341	0.719072	0.5366	5.924	5	5	13	Infinity	100	Confident
C01R02	Q8BVI4	Dihydropteridine reductase (DHPR_MOUSE)	ENSMUSG00000015806	Qdpr	5	GO:0008150, GO:0009056, GO:0048856, GO:0043167, GO:0006520, GO:0009058, GO:0043226, GO:0005575, GO:0005622, GO:0003674, GO:0044281, GO:0005623, GO:0005737, GO:0016491, GO:0005739, GO:0051186, GO:0005829, GO:0034641	catabolic process, cellular amino acid metabolic process, cofactor metabolic process, biological_process, cytosol, organelle, cellular_component, cell, molecular_function, mitochondrion, cytoplasm, ion binding, cellular nitrogen compound metabolic process, biosynthetic process, small molecule metabolic process, oxidoreductase activity, anatomical structure development, intracellular	25.5538	88.38	37.34	24.07	42.8534	0.00878285	0.823348	0.0723565	6.78306	7	7	13	Infinity	100	Confident
C01R02	Q9CR68	Cytochrome b-c1 complex subunit Rieske, mitochondrial (UCRI_MOUSE)	ENSMUSG00000038462	Uqcrfs1	13	GO:0008150, GO:0006091, GO:0022857, GO:0043167, GO:0043234, GO:0043226, GO:0005575, GO:0003674, GO:0005622, GO:0005623, GO:0016491, GO:0005737, GO:0005739	biological_process, transmembrane transporter activity, organelle, protein complex, cellular_component, cell, molecular_function, mitochondrion, cytoplasm, ion binding, generation of precursor metabolites and energy, oxidoreductase activity, intracellular	29.3492	75.18	45.26	45.26	184.806	0.0378763	1.04336	0.31204	8.5956	10	10	19	Infinity	100	Confident
C01R02	Q9CR62	Mitochondrial 2-oxoglutarate/malate carrier protein (M2OM_MOUSE)	ENSMUSG00000014606	Slc25a11	11	GO:0005623, GO:0008150, GO:0022857, GO:0005737, GO:0005739, GO:0043226, GO:0005575, GO:0006810, GO:0005622, GO:0003674	cytoplasm, biological_process, transmembrane transporter activity, organelle, transport, cell, cellular_component, intracellular, mitochondrion, molecular_function	34.1329	87.9	36.94	36.94	110.707	0.0226895	0.863246	0.186925	7.11176	12	12	19	Infinity	100	Confident
C01R02	Q9CR61	NADH dehydrogenase [ubiquinone] 1 beta subcomplex subunit 7 (NDUB7_MOUSE)	ENSMUSG00000033938	Ndufb7	8	GO:0008150, GO:0065003, GO:0006461, GO:0022607, GO:0043234, GO:0043226, GO:0005575, GO:0003674, GO:0005622, GO:0007005, GO:0005623, GO:0005737, GO:0016491, GO:0005739	mitochondrion organization, biological_process, cellular component assembly, organelle, macromolecular complex assembly, protein complex, cellular_component, cell, molecular_function, mitochondrion, cytoplasm, protein complex assembly, oxidoreductase activity, intracellular	16.3202	100	9.49	9.49	71.2293	0.0145985	0.0926009	0.120268	0.762882	1	1	2	31.8977	93.5841	Doubtful
C01R02	P56812	Programmed cell death protein 5 (PDCD5_MOUSE)	ENSMUSG00000030417	Pdcd5	7	GO:0008283, GO:0061024, GO:0008150, GO:0055085, GO:0007165, GO:0043167, GO:0006457, GO:0043226, GO:0006810, GO:0005575, GO:0003674, GO:0005622, GO:0007005, GO:0005634, GO:0005623, GO:0006605, GO:0003677, GO:0008219, GO:0005737, GO:0005829, GO:0008092, GO:0030234	mitochondrion organization, cell proliferation, cell death, biological_process, signal transduction, cytosol, organelle, nucleus, transport, cellular_component, cell, molecular_function, cytoplasm, transmembrane transport, ion binding, membrane organization, enzyme regulator activity, dna binding, protein targeting, protein folding, cytoskeletal protein binding, intracellular	14.2663	100	9.52	9.52	38.7239	0.00793651	0.115884	0.065384	0.954697	1	1	1	29.6332	90.1758	Doubtful
C01R02	Q9DCT2	NADH dehydrogenase [ubiquinone] iron-sulfur protein 3, mitochondrial (NDUS3_MOUSE)	ENSMUSG00000111727	Ndufs3	CHR_MG191_PATCH	GO:0008150, GO:0006091, GO:0007165, GO:0043234, GO:0043226, GO:0005575, GO:0005622, GO:0003674, GO:0040007, GO:0005654, GO:0005623, GO:0005634, GO:0008219, GO:0005737, GO:0016491, GO:0005739	nucleoplasm, cell death, biological_process, signal transduction, organelle, nucleus, protein complex, cellular_component, cell, molecular_function, mitochondrion, cytoplasm, generation of precursor metabolites and energy, growth, oxidoreductase activity, intracellular	30.1305	88.59	19.77	19.77	180.883	0.0370722	0.34596	0.305416	2.85016	4	4	15	Infinity	100	Confident
C01R02	Q9CQR4	Acyl-coenzyme A thioesterase 13 (ACO13_MOUSE)	ENSMUSG00000006717	Acot13	13	GO:0008150, GO:0065003, GO:0006461, GO:0022607, GO:0043226, GO:0005575, GO:0003674, GO:0005622, GO:0005623, GO:0005634, GO:0005856, GO:0005737, GO:0005739, GO:0005829	biological_process, cytoskeleton, cytosol, cellular component assembly, organelle, nucleus, macromolecular complex assembly, cellular_component, cell, molecular_function, mitochondrion, cytoplasm, protein complex assembly, intracellular	15.1729	81.43	7.14	7.14	34.8515	0.00714286	0.145048	0.0588456	1.19496	1	1	1	29.6332	90.1758	Doubtful
C01R02	Q9DCS9	NADH dehydrogenase [ubiquinone] 1 beta subcomplex subunit 10 (NDUBA_MOUSE)	ENSMUSG00000040048	Ndufb10	17	GO:0008150, GO:0065003, GO:0006461, GO:0022607, GO:0043234, GO:0043226, GO:0005575, GO:0005622, GO:0007005, GO:0003674, GO:0005623, GO:0005737, GO:0005739	mitochondrion organization, biological_process, cellular component assembly, organelle, macromolecular complex assembly, protein complex, cellular_component, cell, molecular_function, mitochondrion, cytoplasm, protein complex assembly, intracellular	21.0104	100	27.27	16.48	106.271	0.0217803	0.258925	0.179435	2.13313	3	3	7	Infinity	100	Confident
C01R02	Q6PHN9	Ras-related protein Rab-35 (RAB35_MOUSE)	ENSMUSG00000029518	Rab35	5	GO:0008150, GO:0048856, GO:0043167, GO:0008289, GO:0043226, GO:0005576, GO:0006810, GO:0005575, GO:0005886, GO:0005622, GO:0002376, GO:0007049, GO:0000278, GO:0003674, GO:0051301, GO:0005623, GO:0005768, GO:0016192, GO:0005737, GO:0003924, GO:0005739, GO:0030154, GO:0031410	cell differentiation, biological_process, plasma membrane, cell cycle, organelle, gtpase activity, cell division, extracellular region, mitotic cell cycle, transport, cellular_component, cell, lipid binding, molecular_function, mitochondrion, cytoplasm, ion binding, endosome, cytoplasmic vesicle, immune system process, anatomical structure development, intracellular, vesicle-mediated transport	23.0108	100	15.92	15.92	35.7815	0.00733346	0.249609	0.0604159	2.05638	4	2	7	26.8319	88.247	Confident
C01R02	P05202	Aspartate aminotransferase, mitochondrial (AATM_MOUSE)	ENSMUSG00000031672	Got2	8	GO:0008150, GO:0009056, GO:0043167, GO:0006520, GO:0008289, GO:0009058, GO:0043226, GO:0005575, GO:0006810, GO:0005886, GO:0003674, GO:0005622, GO:0044281, GO:0005623, GO:0005737, GO:0051186, GO:0005739, GO:0019899	enzyme binding, catabolic process, cellular amino acid metabolic process, cofactor metabolic process, biological_process, plasma membrane, organelle, transport, cellular_component, cell, lipid binding, molecular_function, mitochondrion, cytoplasm, ion binding, biosynthetic process, small molecule metabolic process, intracellular	47.3812	86.98	28.14	28.14	80.8973	0.01658	0.714125	0.136593	5.88324	14	14	26	Infinity	100	Confident
C01R02	Q9DCZ4	MICOS complex subunit Mic26 (MIC26_MOUSE)	ENSMUSG00000079508	Apoo	X	GO:0008150, GO:0061024, GO:0005794, GO:0005783, GO:0043234, GO:0005576, GO:0043226, GO:0005575, GO:0005622, GO:0003674, GO:0007005, GO:0005623, GO:0005737, GO:0005739, GO:0005829	mitochondrion organization, biological_process, cytosol, organelle, extracellular region, protein complex, cellular_component, cell, molecular_function, mitochondrion, cytoplasm, membrane organization, golgi apparatus, intracellular, endoplasmic reticulum	22.5896	84.85	12.63	12.63	36.9637	0.00757576	0.245197	0.062412	2.02003	3	3	3	65.613	96.6019	Confident
C01R02	P18572	Basigin (BASI_MOUSE)	ENSMUSG00000023175	Bsg	10	GO:0008150, GO:0061024, GO:0048856, GO:0043226, GO:0005575, GO:0005622, GO:0003674, GO:0005886, GO:0000003, GO:0005623, GO:0007009, GO:0005737, GO:0005739, GO:0031410	biological_process, plasma membrane, organelle, cellular_component, cell, molecular_function, mitochondrion, cytoplasm, plasma membrane organization, cytoplasmic vesicle, membrane organization, anatomical structure development, intracellular, reproduction	42.4183	68.64	7.71	7.71	46.7357	0.00957854	0.193777	0.0789118	1.59641	3	3	5	Infinity	100	Confident
C01R02	Q9CQX2	Cytochrome b5 type B (CYB5B_MOUSE)	ENSMUSG00000031924	Cyb5b	8	GO:0008150, GO:0005623, GO:0005737, GO:0005739, GO:0043167, GO:0043226, GO:0030234, GO:0005575, GO:0003674, GO:0005622	cytoplasm, ion binding, biological_process, organelle, enzyme regulator activity, cell, cellular_component, intracellular, mitochondrion, molecular_function	16.3078	58.9	17.12	17.12	152.475	0.03125	0.389495	0.25745	3.20882	2	2	4	Infinity	100	Confident
C01R02	Q9CQW1	Synaptobrevin homolog YKT6 (YKT6_MOUSE)	ENSMUSG00000002741	Ykt6	11	GO:0008150, GO:0061024, GO:0016746, GO:0005783, GO:0005794, GO:0043234, GO:0043226, GO:0005575, GO:0006810, GO:0005886, GO:0003674, GO:0005622, GO:0005623, GO:0005768, GO:0016192, GO:0005737, GO:0005739, GO:0005829, GO:0031410	biological_process, plasma membrane, cytosol, organelle, transferase activity, transferring acyl groups, transport, protein complex, cellular_component, cell, molecular_function, mitochondrion, cytoplasm, endosome, cytoplasmic vesicle, membrane organization, golgi apparatus, intracellular, endoplasmic reticulum, vesicle-mediated transport	22.3003	100	8.59	8.59	36.9637	0.00757576	0.193777	0.062412	1.59641	2	2	2	59.2663	96.2085	Confident
C01R02	Q9DCX2	ATP synthase subunit d, mitochondrial (ATP5H_MOUSE)	ENSMUSG00000034566	Atp5h	11	GO:0016887, GO:0008150, GO:0055085, GO:0022857, GO:0043234, GO:0009058, GO:0043226, GO:0005575, GO:0006810, GO:0005622, GO:0003674, GO:0005654, GO:0044281, GO:0005623, GO:0005634, GO:0005737, GO:0005739, GO:0034641	nucleoplasm, biological_process, transmembrane transporter activity, organelle, nucleus, transport, protein complex, cellular_component, cell, atpase activity, molecular_function, mitochondrion, cytoplasm, transmembrane transport, cellular nitrogen compound metabolic process, biosynthetic process, small molecule metabolic process, intracellular	18.7376	100	59.01	50.93	259.871	0.0532609	1.31013	0.438784	10.7934	9	9	17	Infinity	100	Confident
C01R02	Q9CQV6	Microtubule-associated proteins 1A/1B light chain 3B (MLP3B_MOUSE)	ENSMUSG00000031812	Map1lc3b	8	GO:0008150, GO:0009056, GO:0022607, GO:0043226, GO:0006810, GO:0005575, GO:0005773, GO:0003674, GO:0006950, GO:0005622, GO:0007005, GO:0005764, GO:0005623, GO:0005856, GO:0005737, GO:0006914, GO:0005739, GO:0005929, GO:0031410, GO:0005829, GO:0019899	enzyme binding, mitochondrion organization, catabolic process, autophagy, vacuole, biological_process, cytoskeleton, cytosol, cellular component assembly, organelle, transport, cellular_component, cell, molecular_function, mitochondrion, cytoplasm, cilium, cytoplasmic vesicle, response to stress, intracellular, lysosome	14.6076	73.6	11.2	0	53.0349	0.0108696	0.128838	0.0895477	1.06142	1	1	1	Infinity	100	Doubtful
C01R02	Q9DCW4	Electron transfer flavoprotein subunit beta (ETFB_MOUSE)	ENSMUSG00000004610	Etfb	7	GO:0008150, GO:0006091, GO:0009056, GO:0043234, GO:0043226, GO:0005575, GO:0005622, GO:0003674, GO:0044281, GO:0005623, GO:0016491, GO:0005737, GO:0005739, GO:0006629, GO:0005829	catabolic process, biological_process, cytosol, organelle, protein complex, cellular_component, cell, molecular_function, mitochondrion, cytoplasm, generation of precursor metabolites and energy, small molecule metabolic process, lipid metabolic process, oxidoreductase activity, intracellular	27.606	86.27	19.61	19.61	79.472	0.0162879	0.26638	0.134186	2.19454	4	4	8	Infinity	100	Confident
C01R02	Q9DCN2	NADH-cytochrome b5 reductase 3 (NB5R3_MOUSE)	ENSMUSG00000018042	Cyb5r3	15	GO:0008150, GO:0043167, GO:0005783, GO:0009058, GO:0043226, GO:0005575, GO:0003674, GO:0005622, GO:0044281, GO:0005811, GO:0005623, GO:0016491, GO:0005737, GO:0006629, GO:0005739	lipid droplet, biological_process, organelle, cellular_component, cell, molecular_function, mitochondrion, cytoplasm, ion binding, biosynthetic process, small molecule metabolic process, lipid metabolic process, oxidoreductase activity, intracellular, endoplasmic reticulum	34.1057	89.7	16.28	16.28	63.249	0.012963	0.218188	0.106794	1.79752	3	3	10	Infinity	100	Confident
C01R02	Q9CQQ7	ATP synthase F(0) complex subunit B1, mitochondrial (AT5F1_MOUSE)	ENSMUSG00000000563	Atp5f1	3	GO:0016887, GO:0008150, GO:0055085, GO:0022857, GO:0043234, GO:0009058, GO:0043226, GO:0005575, GO:0006810, GO:0005622, GO:0003674, GO:0005654, GO:0044281, GO:0005623, GO:0005634, GO:0005737, GO:0005739, GO:0034641	nucleoplasm, biological_process, transmembrane transporter activity, organelle, nucleus, transport, protein complex, cellular_component, cell, atpase activity, molecular_function, mitochondrion, cytoplasm, transmembrane transport, cellular nitrogen compound metabolic process, biosynthetic process, small molecule metabolic process, intracellular	28.9304	100	29.69	29.69	261.848	0.053666	0.807769	0.442121	6.65471	11	11	33	Infinity	100	Confident
C01R02	Q9CR21	Acyl carrier protein, mitochondrial (ACPM_MOUSE)	ENSMUSG00000030869	Ndufab1	7	GO:0008150, GO:0065003, GO:0006461, GO:0022607, GO:0006464, GO:0043167, GO:0043234, GO:0009058, GO:0043226, GO:0005575, GO:0007005, GO:0003674, GO:0005622, GO:0005654, GO:0044281, GO:0005634, GO:0005975, GO:0005623, GO:0005737, GO:0005739, GO:0006629, GO:0005829, GO:0051604	carbohydrate metabolic process, mitochondrion organization, nucleoplasm, protein maturation, biological_process, cytosol, cellular component assembly, organelle, nucleus, macromolecular complex assembly, protein complex, cellular_component, cell, molecular_function, mitochondrion, cytoplasm, ion binding, biosynthetic process, small molecule metabolic process, lipid metabolic process, protein comp…	17.359	80.13	5.77	5.77	39.0337	0.008	0.145048	0.0659071	1.19496	1	1	1	29.6332	90.1758	Doubtful
C01R02	Q9Z2I0	Mitochondrial proton/calcium exchanger protein (LETM1_MOUSE)	ENSMUSG00000005299	Letm1	5	GO:0061024, GO:0008150, GO:0055085, GO:0022857, GO:0065003, GO:0006461, GO:0022607, GO:0043167, GO:0043226, GO:0005575, GO:0006810, GO:0003674, GO:0005622, GO:0007005, GO:0005623, GO:0005737, GO:0042592, GO:0005739	mitochondrion organization, biological_process, transmembrane transporter activity, cellular component assembly, organelle, macromolecular complex assembly, transport, cellular_component, cell, molecular_function, mitochondrion, cytoplasm, transmembrane transport, ion binding, membrane organization, protein complex assembly, homeostatic process, intracellular	82.9369	94.04	4.61	4.61	19.9199	0.00408261	0.0673378	0.0336342	0.554755	4	4	6	Infinity	100	Confident
C01R02	Q8CG76	Aflatoxin B1 aldehyde reductase member 2 (ARK72_MOUSE)		Akr7a2		GO:0019748, GO:0008150, GO:0005794, GO:0043226, GO:0005575, GO:0005622, GO:0003674, GO:0044281, GO:0005623, GO:0016491, GO:0005737, GO:0051186, GO:0005739, GO:0005829	cofactor metabolic process, biological_process, cytosol, organelle, cellular_component, cell, molecular_function, mitochondrion, cytoplasm, secondary metabolic process, small molecule metabolic process, golgi apparatus, oxidoreductase activity, intracellular	40.5862	76.57	3.27	3.27	34.7275	0.00711744	0.0660505	0.0586362	0.54415	1	1	2	Infinity	100	Doubtful
C01R02	Q9Z2I9	Succinate--CoA ligase [ADP-forming] subunit beta, mitochondrial (SUCB1_MOUSE)	ENSMUSG00000022110	Sucla2	14	GO:0008150, GO:0006091, GO:0006790, GO:0043167, GO:0043226, GO:0005575, GO:0003674, GO:0005622, GO:0044281, GO:0005623, GO:0005737, GO:0005739, GO:0051186, GO:0016874	cofactor metabolic process, biological_process, organelle, cellular_component, cell, molecular_function, mitochondrion, cytoplasm, ion binding, generation of precursor metabolites and energy, small molecule metabolic process, sulfur compound metabolic process, ligase activity, intracellular	50.0821	80.56	17.28	17.28	96.1056	0.019697	0.29155	0.162271	2.4019	9	9	23	Infinity	100	Confident
C01R02	Q9D3D9	ATP synthase subunit delta, mitochondrial (ATPD_MOUSE)	ENSMUSG00000003072	Atp5d	10	GO:0016887, GO:0008150, GO:0055085, GO:0022857, GO:0043234, GO:0009058, GO:0043226, GO:0006810, GO:0005575, GO:0003674, GO:0005622, GO:0044281, GO:0005623, GO:0005737, GO:0005739, GO:0034641	biological_process, transmembrane transporter activity, organelle, transport, protein complex, cellular_component, cell, atpase activity, molecular_function, mitochondrion, cytoplasm, transmembrane transport, cellular nitrogen compound metabolic process, biosynthetic process, small molecule metabolic process, intracellular	17.5891	33.93	5.36	5.36	85.6001	0.0175439	0.211528	0.144533	1.74265	1	1	1	29.6332	90.1758	Doubtful
C01R02	Q9CRD0	OCIA domain-containing protein 1 (OCAD1_MOUSE)	ENSMUSG00000029152	Ociad1	5	GO:0008150, GO:0005623, GO:0005768, GO:0005737, GO:0005739, GO:0030154, GO:0031410, GO:0043226, GO:0005575, GO:0005622, GO:0003674	cytoplasm, endosome, cell differentiation, cytoplasmic vesicle, biological_process, organelle, cell, cellular_component, intracellular, mitochondrion, molecular_function	27.5928	85.83	27.94	27.94	88.2247	0.0180818	0.34596	0.148965	2.85016	4	4	9	Infinity	100	Confident
C01R02	Q9CQZ6	NADH dehydrogenase [ubiquinone] 1 beta subcomplex subunit 3 (NDUB3_MOUSE)	ENSMUSG00000026032	Ndufb3	1	GO:0008150, GO:0006091, GO:0065003, GO:0006461, GO:0022607, GO:0043234, GO:0043226, GO:0005575, GO:0005622, GO:0003674, GO:0007005, GO:0005623, GO:0005737, GO:0005739	mitochondrion organization, biological_process, cellular component assembly, organelle, macromolecular complex assembly, protein complex, cellular_component, cell, molecular_function, mitochondrion, cytoplasm, generation of precursor metabolites and energy, protein complex assembly, intracellular	11.6848	100	10.58	10.58	93.8309	0.0192308	0.178769	0.158431	1.47277	1	1	2	Infinity	100	Doubtful
C01R02	Q9CQZ5	NADH dehydrogenase [ubiquinone] 1 alpha subcomplex subunit 6 (NDUA6_MOUSE)	ENSMUSG00000022450	Ndufa6	15	GO:0005623, GO:0008150, GO:0005737, GO:0005739, GO:0043234, GO:0043226, GO:0005575, GO:0005622, GO:0006950, GO:0003674	cytoplasm, biological_process, response to stress, organelle, cell, protein complex, cellular_component, intracellular, mitochondrion, molecular_function	15.273	100	33.59	33.59	226.579	0.0464377	0.492496	0.382571	4.05737	5	5	10	Infinity	100	Confident
C01R02	Q9CRB8	Mitochondrial fission process protein 1 (MTFP1_MOUSE)	ENSMUSG00000004748	Mtfp1	11	GO:0008150, GO:0061024, GO:0005623, GO:0008219, GO:0005737, GO:0005739, GO:0043226, GO:0005575, GO:0007005, GO:0005622, GO:0003674	cytoplasm, mitochondrion organization, cell death, biological_process, membrane organization, organelle, cell, cellular_component, intracellular, mitochondrion, molecular_function	18.3026	68.67	6.63	6.63	29.3928	0.0060241	0.145048	0.0496288	1.19496	1	1	1	29.6332	90.1758	Doubtful
C01R02	P42125	Enoyl-CoA delta isomerase 1, mitochondrial (ECI1_MOUSE)	ENSMUSG00000024132	Eci1	17	GO:0008150, GO:0009056, GO:0016829, GO:0043226, GO:0005575, GO:0005622, GO:0003674, GO:0044281, GO:0005623, GO:0005737, GO:0006629, GO:0005739, GO:0016853	catabolic process, biological_process, organelle, cellular_component, cell, molecular_function, mitochondrion, cytoplasm, small molecule metabolic process, lyase activity, lipid metabolic process, isomerase activity, intracellular	32.2298	89.62	14.88	14.88	106.926	0.0219146	0.193777	0.180541	1.59641	4	4	13	Infinity	100	Confident
C01R02	Q9CPQ8	ATP synthase subunit g, mitochondrial (ATP5L_MOUSE)	ENSMUSG00000038717	Atp5l	9	GO:0016887, GO:0008150, GO:0055085, GO:0022857, GO:0009058, GO:0043234, GO:0043226, GO:0006810, GO:0005575, GO:0003674, GO:0005622, GO:0044281, GO:0005623, GO:0005737, GO:0005739, GO:0034641	biological_process, transmembrane transporter activity, organelle, transport, protein complex, cellular_component, cell, atpase activity, molecular_function, mitochondrion, cytoplasm, transmembrane transport, cellular nitrogen compound metabolic process, biosynthetic process, small molecule metabolic process, intracellular	11.4172	100	33.01	14.56	205.274	0.0420712	0.701254	0.346599	5.77721	3	3	6	Infinity	100	Confident
C01R02	Q9CPQ3	Mitochondrial import receptor subunit TOM22 homolog (TOM22_MOUSE)	ENSMUSG00000022427	Tomm22	15	GO:0061024, GO:0008150, GO:0055085, GO:0022857, GO:0008565, GO:0043234, GO:0043226, GO:0005575, GO:0006810, GO:0005622, GO:0003674, GO:0007005, GO:0005623, GO:0006605, GO:0008219, GO:0005737, GO:0005739	mitochondrion organization, cell death, biological_process, transmembrane transporter activity, organelle, protein transporter activity, transport, protein complex, cellular_component, cell, molecular_function, mitochondrion, cytoplasm, transmembrane transport, membrane organization, protein targeting, intracellular	15.5268	100	23.24	23.24	240.524	0.0492958	0.778279	0.406118	6.41177	3	3	10	Infinity	100	Confident
C01R02	Q9CPQ1	Cytochrome c oxidase subunit 6C (COX6C_MOUSE)	ENSMUSG00000014313	Cox6c	15	GO:0008150, GO:0006091, GO:0055085, GO:0022857, GO:0043226, GO:0006810, GO:0005575, GO:0005622, GO:0003674, GO:0005623, GO:0005737, GO:0016491, GO:0005739	biological_process, transmembrane transporter activity, organelle, transport, cellular_component, cell, molecular_function, mitochondrion, cytoplasm, transmembrane transport, generation of precursor metabolites and energy, oxidoreductase activity, intracellular	8.46351	100	43.42	43.42	310.301	0.0635965	0.701254	0.523933	5.77721	3	3	8	Infinity	100	Confident
C01R02	Q9CPP6	NADH dehydrogenase [ubiquinone] 1 alpha subcomplex subunit 5 (NDUA5_MOUSE)	ENSMUSG00000023089	Ndufa5	6	GO:0008150, GO:0006091, GO:0065003, GO:0006461, GO:0022607, GO:0043234, GO:0043226, GO:0005575, GO:0005622, GO:0003674, GO:0007005, GO:0005623, GO:0005737, GO:0016491, GO:0005739	mitochondrion organization, biological_process, cellular component assembly, organelle, macromolecular complex assembly, protein complex, cellular_component, cell, molecular_function, mitochondrion, cytoplasm, generation of precursor metabolites and energy, protein complex assembly, oxidoreductase activity, intracellular	13.3512	100	7.76	7.76	42.0621	0.00862069	0.136464	0.0710206	1.12424	1	1	1	29.6332	90.1758	Doubtful
C01R02	P97450	ATP synthase-coupling factor 6, mitochondrial (ATP5J_MOUSE)	ENSMUSG00000022890	Atp5j	16	GO:0016887, GO:0008150, GO:0055085, GO:0022857, GO:0009058, GO:0043234, GO:0043226, GO:0005575, GO:0006810, GO:0005622, GO:0003674, GO:0044281, GO:0005623, GO:0005737, GO:0005739, GO:0034641	biological_process, transmembrane transporter activity, organelle, transport, protein complex, cellular_component, cell, atpase activity, molecular_function, mitochondrion, cytoplasm, transmembrane transport, cellular nitrogen compound metabolic process, biosynthetic process, small molecule metabolic process, intracellular	12.4886	100	26.85	26.85	158.122	0.0324074	0.274275	0.266985	2.25958	2	2	5	Infinity	100	Confident
C01R02	Q9CQ85	Mitochondrial import inner membrane translocase subunit Tim22 (TIM22_MOUSE)	ENSMUSG00000020843	Timm22	11	GO:0061024, GO:0008150, GO:0055085, GO:0043234, GO:0043226, GO:0005575, GO:0006810, GO:0003674, GO:0005622, GO:0007005, GO:0005623, GO:0006605, GO:0005737, GO:0005739	mitochondrion organization, biological_process, organelle, transport, protein complex, cellular_component, cell, molecular_function, mitochondrion, cytoplasm, transmembrane transport, membrane organization, protein targeting, intracellular	20.101	69.07	7.73	7.73	29.9338	0.00613497	0.122018	0.0505423	1.00524	1	1	1	29.6332	90.1758	Doubtful
C01R02	Q9CPV4	Glyoxalase domain-containing protein 4 (GLOD4_MOUSE)	ENSMUSG00000017286	Glod4	11	GO:0005623, GO:0005737, GO:0005739, GO:0043226, GO:0005575, GO:0003674, GO:0005622	cytoplasm, organelle, cell, cellular_component, intracellular, mitochondrion, molecular_function	33.2955	91.28	3.02	3.02	49.1195	0.0100671	0.0680004	0.0829368	0.560214	3	3	5	Infinity	100	Doubtful
C01R02	Q9CQ75	NADH dehydrogenase [ubiquinone] 1 alpha subcomplex subunit 2 (NDUA2_MOUSE)	ENSMUSG00000014294	Ndufa2	18	GO:0008150, GO:0065003, GO:0006461, GO:0022607, GO:0043234, GO:0043226, GO:0005575, GO:0007005, GO:0003674, GO:0005622, GO:0005623, GO:0005737, GO:0016491, GO:0005739	mitochondrion organization, biological_process, cellular component assembly, organelle, macromolecular complex assembly, protein complex, cellular_component, cell, molecular_function, mitochondrion, cytoplasm, protein complex assembly, oxidoreductase activity, intracellular	10.9088	100	23.23	23.23	73.9274	0.0151515	0.333521	0.124824	2.74768	2	2	2	59.2663	96.2085	Confident
C01R02	Q9Z1P6	NADH dehydrogenase [ubiquinone] 1 alpha subcomplex subunit 7 (NDUA7_MOUSE)	ENSMUSG00000041881	Ndufa7	17	GO:0008150, GO:0006091, GO:0005198, GO:0009058, GO:0043234, GO:0005840, GO:0043226, GO:0005575, GO:0003674, GO:0005622, GO:0006412, GO:0044281, GO:0005623, GO:0003735, GO:0005737, GO:0016491, GO:0005739, GO:0034641	biological_process, organelle, structural molecule activity, protein complex, cellular_component, cell, molecular_function, mitochondrion, cytoplasm, cellular nitrogen compound metabolic process, generation of precursor metabolites and energy, biosynthetic process, small molecule metabolic process, translation, ribosome, oxidoreductase activity, intracellular, structural constituent of ribosome	12.5676	100	28.32	28.32	331.038	0.0678466	0.412538	0.558947	3.39864	3	3	12	Infinity	100	Confident
C01R02	Q9CQ69	Cytochrome b-c1 complex subunit 8 (QCR8_MOUSE)	ENSMUSG00000044894	Uqcrq	11	GO:0008150, GO:0006091, GO:0022857, GO:0048856, GO:0043234, GO:0043226, GO:0005575, GO:0005622, GO:0003674, GO:0044281, GO:0005623, GO:0005737, GO:0016491, GO:0005739, GO:0030154, GO:0034641	cell differentiation, biological_process, transmembrane transporter activity, organelle, protein complex, cellular_component, cell, molecular_function, mitochondrion, cytoplasm, cellular nitrogen compound metabolic process, generation of precursor metabolites and energy, small molecule metabolic process, oxidoreductase activity, anatomical structure development, intracellular	9.76211	100	37.8	37.8	168.591	0.0345528	0.637894	0.28466	5.25522	3	3	5	Infinity	100	Confident
C01R02	Q9DC70	NADH dehydrogenase [ubiquinone] iron-sulfur protein 7, mitochondrial (NDUS7_MOUSE)	ENSMUSG00000020153	Ndufs7	10	GO:0008150, GO:0065003, GO:0006461, GO:0022607, GO:0043167, GO:0043234, GO:0043226, GO:0005575, GO:0003674, GO:0005622, GO:0007005, GO:0005886, GO:0005623, GO:0016491, GO:0005737, GO:0005739, GO:0019899	enzyme binding, mitochondrion organization, biological_process, plasma membrane, cellular component assembly, organelle, macromolecular complex assembly, protein complex, cellular_component, cell, molecular_function, mitochondrion, cytoplasm, ion binding, protein complex assembly, oxidoreductase activity, intracellular	24.6668	75.89	10.27	10.27	76.2376	0.015625	0.172102	0.128725	1.41785	2	2	4	Infinity	100	Confident
C01R02	Q9CQ54	NADH dehydrogenase [ubiquinone] 1 subunit C2 (NDUC2_MOUSE)	ENSMUSG00000030647	Ndufc2	7	GO:0008150, GO:0006091, GO:0065003, GO:0007165, GO:0006461, GO:0022607, GO:0009058, GO:0043234, GO:0043226, GO:0005575, GO:0005622, GO:0006950, GO:0007005, GO:0003674, GO:0044281, GO:0005623, GO:0008219, GO:0016491, GO:0005737, GO:0005739, GO:0034641	mitochondrion organization, cell death, biological_process, signal transduction, cellular component assembly, organelle, macromolecular complex assembly, protein complex, cellular_component, cell, molecular_function, mitochondrion, cytoplasm, cellular nitrogen compound metabolic process, generation of precursor metabolites and energy, biosynthetic process, response to stress, small molecule metab…	14.1542	100	25.83	25.83	88.0968	0.0180556	0.584893	0.148749	4.81858	4	4	5	Infinity	100	Confident
C01R02	Q9DC69	NADH dehydrogenase [ubiquinone] 1 alpha subcomplex subunit 9, mitochondrial (NDUA9_MOUSE)	ENSMUSG00000000399	Ndufa9	6	GO:0008150, GO:0065003, GO:0006461, GO:0022607, GO:0043234, GO:0009058, GO:0043226, GO:0005575, GO:0003674, GO:0005622, GO:0007005, GO:0005654, GO:0044281, GO:0005623, GO:0005634, GO:0005737, GO:0016491, GO:0005739, GO:0051186	mitochondrion organization, nucleoplasm, cofactor metabolic process, biological_process, cellular component assembly, organelle, nucleus, macromolecular complex assembly, protein complex, cellular_component, cell, molecular_function, mitochondrion, cytoplasm, biosynthetic process, small molecule metabolic process, protein complex assembly, oxidoreductase activity, intracellular	42.4984	92.84	25.46	25.46	89.6401	0.0183719	0.409082	0.151355	3.37017	8	8	16	Infinity	100	Confident
C01R02	P07901	Heat shock protein HSP 90-alpha (HS90A_MOUSE)	ENSMUSG00000021270	Hsp90aa1	12	GO:0016887, GO:0009056, GO:0006461, GO:0022607, GO:0048856, GO:0006464, GO:0043167, GO:0007155, GO:0009058, GO:0043226, GO:0005575, GO:0003674, GO:0005623, GO:0005829, GO:0031410, GO:0034641, GO:0008150, GO:0061024, GO:0055085, GO:0065003, GO:0007165, GO:0000902, GO:0022618, GO:0051082, GO:0006259, GO:0006457, GO:0006810, GO:0005622, GO:0040007, GO:0007005, GO:0006950, GO:0005886, GO:0002376, GO:…	cell differentiation, cellular component assembly, cellular_component, cell, molecular_function, cytoplasm, ion binding, cellular nitrogen compound metabolic process, biosynthetic process, cell adhesion, membrane organization, enzyme regulator activity, cell morphogenesis, protein targeting, protein folding, immune system process, homeostatic process, cytoskeletal protein binding, unfolded protei…	84.7348	81.99	9.69	6.41	39.3652	0.00806794	0.135131	0.0664668	1.11326	6	2	14	Infinity	100	Confident
C01R02	Q9DBL1	Short/branched chain specific acyl-CoA dehydrogenase, mitochondrial (ACDSB_MOUSE)	ENSMUSG00000030861	Acadsb	7	GO:0008150, GO:0006790, GO:0043167, GO:0043226, GO:0005575, GO:0003674, GO:0005622, GO:0044281, GO:0005623, GO:0016491, GO:0005737, GO:0006629, GO:0051186, GO:0005739	cofactor metabolic process, biological_process, organelle, cellular_component, cell, molecular_function, mitochondrion, cytoplasm, ion binding, small molecule metabolic process, lipid metabolic process, sulfur compound metabolic process, oxidoreductase activity, intracellular	47.8433	83.8	9.26	9.26	20.2177	0.00414365	0.102943	0.034137	0.848087	4	4	4	Infinity	100	Confident
C01R02	Q64521	Glycerol-3-phosphate dehydrogenase, mitochondrial (GPDM_MOUSE)	ENSMUSG00000026827	Gpd2	2	GO:0008150, GO:0009056, GO:0043167, GO:0048856, GO:0009058, GO:0043226, GO:0005575, GO:0003674, GO:0040007, GO:0005622, GO:0044281, GO:0005975, GO:0005623, GO:0016491, GO:0005737, GO:0005739	carbohydrate metabolic process, catabolic process, biological_process, organelle, cellular_component, cell, molecular_function, mitochondrion, cytoplasm, ion binding, biosynthetic process, small molecule metabolic process, growth, oxidoreductase activity, anatomical structure development, intracellular	80.9025	87.07	25.58	24.48	53.2266	0.0109089	0.461187	0.0898714	3.79944	17	17	35	Infinity	100	Confident
C01R02	P24472	Glutathione S-transferase A4 (GSTA4_MOUSE)	ENSMUSG00000032348	Gsta4	9	GO:0008150, GO:0006790, GO:0043167, GO:0043226, GO:0005575, GO:0003674, GO:0006950, GO:0005622, GO:0005623, GO:0005737, GO:0051186, GO:0005739, GO:0034641, GO:0016765	cofactor metabolic process, biological_process, organelle, transferase activity, transferring alkyl or aryl (other than methyl) groups, cellular_component, cell, molecular_function, mitochondrion, cytoplasm, ion binding, cellular nitrogen compound metabolic process, response to stress, sulfur compound metabolic process, intracellular	25.5474	80.18	15.77	15.77	54.8226	0.011236	0.172102	0.0925662	1.41785	5	5	6	Infinity	100	Confident
C01R02	Q8C5H8	NAD kinase 2, mitochondrial (NAKD2_MOUSE)	ENSMUSG00000111527	Nadk2	CHR_MG4288_PATCH	GO:0008150, GO:0043167, GO:0009058, GO:0043226, GO:0005575, GO:0005622, GO:0003674, GO:0044281, GO:0005623, GO:0005737, GO:0051186, GO:0005739, GO:0034641, GO:0016301	cofactor metabolic process, biological_process, organelle, cellular_component, cell, molecular_function, mitochondrion, cytoplasm, ion binding, cellular nitrogen compound metabolic process, biosynthetic process, kinase activity, small molecule metabolic process, intracellular	50.8269	87.83	3.1	3.1	10.7947	0.00221239	0.0384688	0.0182265	0.316921	2	2	2	Infinity	100	Doubtful
C01R02	P00416	Cytochrome c oxidase subunit 3 (COX3_MOUSE)	ENSMUSG00000064358	mt-Co3	MT	GO:0008150, GO:0006091, GO:0055085, GO:0065003, GO:0022857, GO:0006461, GO:0022607, GO:0043234, GO:0043226, GO:0005575, GO:0006810, GO:0005622, GO:0003674, GO:0005623, GO:0005737, GO:0016491, GO:0005739	biological_process, transmembrane transporter activity, cellular component assembly, organelle, macromolecular complex assembly, transport, protein complex, cellular_component, cell, molecular_function, mitochondrion, cytoplasm, transmembrane transport, generation of precursor metabolites and energy, protein complex assembly, oxidoreductase activity, intracellular	29.9031	11.88	5.36	5.36	314.788	0.0645161	0.258925	0.531509	2.13313	1	1	2	Infinity	100	Doubtful
C01R02	Q8R127	Saccharopine dehydrogenase-like oxidoreductase (SCPDL_MOUSE)	ENSMUSG00000038936	Sccpdh	1	GO:0005811, GO:0008150, GO:0005623, GO:0005737, GO:0016491, GO:0005739, GO:0043226, GO:0005575, GO:0005622, GO:0003674	lipid droplet, cytoplasm, biological_process, organelle, oxidoreductase activity, cell, cellular_component, intracellular, mitochondrion, molecular_function	47.0991	66.67	6.99	4.9	49.0373	0.0100503	0.174269	0.0827979	1.43569	4	4	9	Infinity	100	Confident
C01R02	Q9CQA3	Succinate dehydrogenase [ubiquinone] iron-sulfur subunit, mitochondrial (SDHB_MOUSE)	ENSMUSG00000009863	Sdhb	4	GO:0008150, GO:0006091, GO:0043167, GO:0043234, GO:0043226, GO:0005575, GO:0003674, GO:0005622, GO:0005886, GO:0005654, GO:0044281, GO:0005623, GO:0005634, GO:0016491, GO:0005737, GO:0005739	nucleoplasm, biological_process, plasma membrane, organelle, nucleus, protein complex, cellular_component, cell, molecular_function, mitochondrion, cytoplasm, ion binding, generation of precursor metabolites and energy, small molecule metabolic process, oxidoreductase activity, intracellular	31.7929	90.78	22.7	22.7	130.343	0.0267139	0.389495	0.22008	3.20882	7	7	16	Infinity	100	Confident
C01R02	Q9DCJ5	NADH dehydrogenase [ubiquinone] 1 alpha subcomplex subunit 8 (NDUA8_MOUSE)	ENSMUSG00000026895	Ndufa8	2	GO:0008150, GO:0006091, GO:0065003, GO:0006461, GO:0022607, GO:0043234, GO:0043226, GO:0005575, GO:0005622, GO:0003674, GO:0007005, GO:0044281, GO:0005623, GO:0005737, GO:0005739, GO:0034641	mitochondrion organization, biological_process, cellular component assembly, organelle, macromolecular complex assembly, protein complex, cellular_component, cell, molecular_function, mitochondrion, cytoplasm, cellular nitrogen compound metabolic process, generation of precursor metabolites and energy, small molecule metabolic process, protein complex assembly, intracellular	19.9791	100	7.56	7.56	56.735	0.0116279	0.100694	0.0957952	0.829558	1	1	2	Infinity	100	Doubtful
C01R02	Q9CQH3	NADH dehydrogenase [ubiquinone] 1 beta subcomplex subunit 5, mitochondrial (NDUB5_MOUSE)	ENSMUSG00000027673	Ndufb5	3	GO:0008150, GO:0065003, GO:0006461, GO:0022607, GO:0043234, GO:0043226, GO:0005575, GO:0005622, GO:0007005, GO:0003674, GO:0005654, GO:0005623, GO:0005634, GO:0005737, GO:0005739	mitochondrion organization, nucleoplasm, biological_process, cellular component assembly, organelle, nucleus, macromolecular complex assembly, protein complex, cellular_component, cell, molecular_function, mitochondrion, cytoplasm, protein complex assembly, intracellular	21.6964	77.78	14.29	14.29	193.619	0.0396825	0.29155	0.32692	2.4019	3	3	7	Infinity	100	Confident
C01R02	Q9D2G2	Dihydrolipoyllysine-residue succinyltransferase component of 2-oxoglutarate dehydrogenase complex, mitochondrial (ODO2_MOUSE)	ENSMUSG00000004789	Dlst	12	GO:0008150, GO:0016746, GO:0006091, GO:0006790, GO:0009056, GO:0006464, GO:0006520, GO:0043234, GO:0043226, GO:0005575, GO:0003674, GO:0005622, GO:0044281, GO:0005623, GO:0005634, GO:0005737, GO:0051186, GO:0005739	catabolic process, cellular amino acid metabolic process, cofactor metabolic process, biological_process, organelle, transferase activity, transferring acyl groups, nucleus, protein complex, cellular_component, cell, molecular_function, mitochondrion, cytoplasm, generation of precursor metabolites and energy, small molecule metabolic process, sulfur compound metabolic process, cellular protein mo…	48.9635	76.65	8.81	8.81	53.7461	0.0110153	0.13921	0.0907485	1.14687	3	3	6	Infinity	100	Confident
C01R02	O54983	Ketimine reductase mu-crystallin (CRYM_MOUSE)	ENSMUSG00000030905	Crym	7	GO:0008150, GO:0000988, GO:0009058, GO:0043226, GO:0005575, GO:0006810, GO:0003674, GO:0005622, GO:0005634, GO:0005623, GO:0005737, GO:0016491, GO:0005739, GO:0005829, GO:0034641, GO:0050877	nervous system process, biological_process, cytosol, organelle, nucleus, transport, cellular_component, cell, molecular_function, mitochondrion, transcription factor activity, protein binding, cytoplasm, cellular nitrogen compound metabolic process, biosynthetic process, oxidoreductase activity, intracellular	33.5021	51.12	39.94	39.94	146.04	0.0299311	1.51189	0.246584	12.4555	12	12	23	Infinity	100	Confident
C01R02	Q8R164	Valacyclovir hydrolase (BPHL_MOUSE)	ENSMUSG00000038286	Bphl	13	GO:0005623, GO:0005737, GO:0005739, GO:0043226, GO:0005575, GO:0003674, GO:0005622	cytoplasm, organelle, cell, cellular_component, intracellular, mitochondrion, molecular_function	32.8301	100	4.81	4.81	33.5341	0.00687285	0.0660505	0.0566212	0.54415	1	1	2	Infinity	100	Doubtful
C01R02	Q9CQ92	Mitochondrial fission 1 protein (FIS1_MOUSE)	ENSMUSG00000019054	Fis1	5	GO:0008150, GO:0061024, GO:0065003, GO:0009056, GO:0007165, GO:0006461, GO:0022607, GO:0048856, GO:0005783, GO:0043226, GO:0005575, GO:0006810, GO:0007005, GO:0003674, GO:0005622, GO:0005777, GO:0006605, GO:0005623, GO:0008219, GO:0005737, GO:0006914, GO:0042592, GO:0005739	mitochondrion organization, catabolic process, autophagy, cell death, biological_process, signal transduction, cellular component assembly, organelle, peroxisome, macromolecular complex assembly, transport, cellular_component, cell, molecular_function, mitochondrion, cytoplasm, membrane organization, protein targeting, protein complex assembly, homeostatic process, anatomical structure developmen…	16.998	80.92	34.21	34.21	98.9752	0.0202851	0.467799	0.167116	3.85391	4	4	6	Infinity	100	Confident
C01R02	Q9CQ91	NADH dehydrogenase [ubiquinone] 1 alpha subcomplex subunit 3 (NDUA3_MOUSE)	ENSMUSG00000035674	Ndufa3	7	GO:0008150, GO:0065003, GO:0006461, GO:0022607, GO:0043234, GO:0043226, GO:0005575, GO:0007005, GO:0003674, GO:0005622, GO:0005623, GO:0005737, GO:0005739	mitochondrion organization, biological_process, cellular component assembly, organelle, macromolecular complex assembly, protein complex, cellular_component, cell, molecular_function, mitochondrion, cytoplasm, protein complex assembly, intracellular	9.32476	100	41.67	41.67	145.215	0.0297619	0.778279	0.24519	6.41177	2	2	5	Infinity	100	Confident
C01R02	P13707	Glycerol-3-phosphate dehydrogenase [NAD(+)], cytoplasmic (GPDA_MOUSE)	ENSMUSG00000023019	Gpd1	15	GO:0008150, GO:0006091, GO:0009056, GO:0009058, GO:0043226, GO:0005575, GO:0003674, GO:0005622, GO:0044281, GO:0005623, GO:0005975, GO:0016491, GO:0005737, GO:0006629, GO:0051186, GO:0005739, GO:0005829, GO:0034641	carbohydrate metabolic process, catabolic process, cofactor metabolic process, biological_process, cytosol, organelle, cellular_component, cell, molecular_function, mitochondrion, cytoplasm, cellular nitrogen compound metabolic process, generation of precursor metabolites and energy, biosynthetic process, small molecule metabolic process, lipid metabolic process, oxidoreductase activity, intracel…	37.5484	82.52	3.72	3.72	15.3918	0.00315457	0.0660505	0.0259886	0.54415	4	2	5	23.2836	87.7833	Doubtful
C01R02	P30275	Creatine kinase U-type, mitochondrial (KCRU_MOUSE)	ENSMUSG00000000308	Ckmt1	2	GO:0005623, GO:0008150, GO:0008219, GO:0005737, GO:0005739, GO:0043167, GO:0043226, GO:0005575, GO:0016301, GO:0005622, GO:0003674	cytoplasm, ion binding, cell death, biological_process, kinase activity, organelle, cell, cellular_component, intracellular, mitochondrion, molecular_function	46.9742	78.95	19.14	19.14	86.1909	0.0176649	0.228247	0.145531	1.88039	5	5	10	Infinity	100	Confident
C01R02	P00405	Cytochrome c oxidase subunit 2 (COX2_MOUSE)		Mtco2		GO:0008150, GO:0006091, GO:0055085, GO:0022857, GO:0043167, GO:0048856, GO:0043234, GO:0043226, GO:0005575, GO:0006810, GO:0003674, GO:0005622, GO:0006950, GO:0044281, GO:0005623, GO:0005737, GO:0016491, GO:0005739, GO:0034641	biological_process, transmembrane transporter activity, organelle, transport, protein complex, cellular_component, cell, molecular_function, mitochondrion, cytoplasm, transmembrane transport, ion binding, cellular nitrogen compound metabolic process, generation of precursor metabolites and energy, response to stress, small molecule metabolic process, oxidoreductase activity, anatomical structure …	25.959	31.28	20.26	20.26	234.798	0.0481221	1.51189	0.396448	12.4555	4	4	7	Infinity	100	Confident
C01R03	O55042	Alpha-synuclein (SYUA_MOUSE)	ENSMUSG00000025889	Snca	6	GO:0007010, GO:0022607, GO:0005794, GO:0043226, GO:0044281, GO:0005623, GO:0008219, GO:0016491, GO:0006914, GO:0005829, GO:0008150, GO:0006091, GO:0065003, GO:0007267, GO:0005840, GO:0006810, GO:0005886, GO:0002376, GO:0005635, GO:0005634, GO:0042393, GO:0042592, GO:0006461, GO:0040011, GO:0009056, GO:0043167, GO:0048856, GO:0006464, GO:0008289, GO:0009058, GO:0005576, GO:0005575, GO:0003674, GO:…	cell-cell signaling, cellular component assembly, molecular_function, enzyme regulator activity, immune system process, extracellular space, homeostatic process, enzyme binding, catabolic process, autophagy, cofactor metabolic process, signal transduction, cytoskeleton, organelle, nuclear envelope, macromolecular complex assembly, mitochondrion, generation of precursor metabolites and energy, res…	14.4762	72.14	49.29	49.29	260.344	0.0495992	1.37137	0.427084	11.8085	6	3	12	Infinity	100	Confident
C01R03	Q9CWZ7	Gamma-soluble NSF attachment protein (SNAG_MOUSE)	ENSMUSG00000024581	Napg	18	GO:0008150, GO:0061024, GO:0043234, GO:0043226, GO:0006810, GO:0005773, GO:0005575, GO:0003674, GO:0005622, GO:0005623, GO:0016192, GO:0005737, GO:0005739	vacuole, biological_process, organelle, transport, protein complex, cellular_component, cell, molecular_function, mitochondrion, cytoplasm, membrane organization, intracellular, vesicle-mediated transport	34.7103	76.92	25.96	25.96	150.85	0.028739	0.511775	0.247463	4.40674	7	7	15	Infinity	100	Confident
C01R03	P48962	ADP/ATP translocase 1 (ADT1_MOUSE)	ENSMUSG00000031633	Slc25a4	8	GO:0061024, GO:0008150, GO:0055085, GO:0022857, GO:0043226, GO:0005575, GO:0006810, GO:0003674, GO:0005622, GO:0007005, GO:0005623, GO:0008219, GO:0005737, GO:0005739	mitochondrion organization, cell death, biological_process, transmembrane transporter activity, organelle, transport, cellular_component, cell, molecular_function, mitochondrion, cytoplasm, transmembrane transport, membrane organization, intracellular	32.8831	81.21	46.64	46.64	189.267	0.036058	1.98538	0.310484	17.0955	23	10	59	Infinity	100	Confident
C01R03	Q61425	Hydroxyacyl-coenzyme A dehydrogenase, mitochondrial (HCDH_MOUSE)	ENSMUSG00000027984	Hadh	3	GO:0008150, GO:0009056, GO:0007267, GO:0043167, GO:0043226, GO:0006810, GO:0005575, GO:0005622, GO:0003674, GO:0005654, GO:0044281, GO:0005623, GO:0005634, GO:0005737, GO:0016491, GO:0006629, GO:0005739	catabolic process, nucleoplasm, biological_process, cell-cell signaling, organelle, nucleus, transport, cellular_component, cell, molecular_function, mitochondrion, cytoplasm, ion binding, small molecule metabolic process, lipid metabolic process, oxidoreductase activity, intracellular	34.4419	61.15	3.5	3.5	37.8986	0.00722022	0.0608184	0.0621711	0.523689	1	1	2	26.4164	84.6073	Doubtful
C01R03	Q99JR1	Sideroflexin-1 (SFXN1_MOUSE)	ENSMUSG00000021474	Sfxn1	13	GO:0008150, GO:0055085, GO:0022857, GO:0048856, GO:0043226, GO:0005575, GO:0006810, GO:0005622, GO:0002376, GO:0003674, GO:0005623, GO:0005737, GO:0042592, GO:0005739, GO:0030154	cell differentiation, biological_process, transmembrane transporter activity, organelle, transport, cellular_component, cell, molecular_function, mitochondrion, cytoplasm, transmembrane transport, immune system process, homeostatic process, anatomical structure development, intracellular	35.6263	79.81	17.08	17.08	75.0824	0.0143042	0.433013	0.12317	3.72854	5	3	7	Infinity	100	Confident
C01R03	P52196	Thiosulfate sulfurtransferase (THTR_MOUSE)	ENSMUSG00000044986	Tst	15	GO:0008150, GO:0055085, GO:0048856, GO:0043226, GO:0005575, GO:0006810, GO:0005622, GO:0003674, GO:0005623, GO:0003723, GO:0005737, GO:0005739, GO:0030154, GO:0019843	cell differentiation, biological_process, organelle, transport, cellular_component, cell, rna binding, molecular_function, mitochondrion, cytoplasm, transmembrane transport, rrna binding, anatomical structure development, intracellular	33.4448	74.07	9.43	9.43	71.5767	0.0136364	0.140625	0.117419	1.21088	2	2	4	Infinity	100	Confident
C01R03	O08749	Dihydrolipoyl dehydrogenase, mitochondrial (DLDH_MOUSE)	ENSMUSG00000020664	Dld	12	GO:0009790, GO:0048856, GO:0006464, GO:0043167, GO:0009058, GO:0043226, GO:0005773, GO:0005575, GO:0003674, GO:0005654, GO:0044281, GO:0005623, GO:0016491, GO:0051186, GO:0005929, GO:0031410, GO:0034641, GO:0008150, GO:0006091, GO:0006790, GO:0021700, GO:0043234, GO:0007568, GO:0005622, GO:0000003, GO:0005634, GO:0005737, GO:0042592, GO:0005739, GO:0006629, GO:0030154	nucleoplasm, cell differentiation, embryo development, cellular_component, cell, protein complex, molecular_function, developmental maturation, cytoplasm, cilium, ion binding, cellular nitrogen compound metabolic process, biosynthetic process, sulfur compound metabolic process, homeostatic process, cofactor metabolic process, vacuole, biological_process, organelle, nucleus, mitochondrion, cytopla…	54.2382	74.26	9.43	9.43	54.1353	0.0103135	0.136464	0.0888067	1.17505	5	5	8	Infinity	100	Confident
C01R03	Q8VDQ8	NAD-dependent protein deacetylase sirtuin-2 (SIR2_MOUSE)	ENSMUSG00000015149	Sirt2	7	GO:0008283, GO:0006461, GO:0009056, GO:0022607, GO:0048856, GO:0006464, GO:0043167, GO:0007059, GO:0005694, GO:0009058, GO:0005730, GO:0043226, GO:0005575, GO:0003674, GO:0051301, GO:0005623, GO:0008219, GO:0006914, GO:0005829, GO:0034641, GO:0016810, GO:0032182, GO:0008150, GO:0065003, GO:0007165, GO:0000228, GO:0021700, GO:0008134, GO:0006950, GO:0005886, GO:0005622, GO:0000003, GO:0007049, GO:…	cell differentiation, cellular component assembly, transcription factor binding, cellular_component, cell, molecular_function, developmental maturation, cytoplasm, ion binding, cellular nitrogen compound metabolic process, biosynthetic process, nucleolus, enzyme binding, catabolic process, autophagy, chromosome organization, cell proliferation, cell death, cytosol, biological_process, signal tran…	43.2284	86.38	14.65	14.65	43.8538	0.00835476	0.245197	0.0719403	2.11132	5	5	8	Infinity	100	Confident
C01R03	P61922	4-aminobutyrate aminotransferase, mitochondrial (GABT_MOUSE)	ENSMUSG00000057880	Abat	16	GO:0009056, GO:0048856, GO:0043167, GO:0006520, GO:0007155, GO:0009058, GO:0043226, GO:0005575, GO:0003013, GO:0003674, GO:0044281, GO:0005623, GO:0034641, GO:0008150, GO:0007165, GO:0007267, GO:0007568, GO:0006810, GO:0005622, GO:0000003, GO:0006950, GO:0005737, GO:0042592, GO:0005739, GO:0019899	cellular amino acid metabolic process, cell-cell signaling, cellular_component, cell, molecular_function, cytoplasm, ion binding, cellular nitrogen compound metabolic process, biosynthetic process, cell adhesion, homeostatic process, enzyme binding, catabolic process, biological_process, signal transduction, organelle, transport, mitochondrion, circulatory system process, response to stress, smal…	56.4156	88.6	39.2	39.2	65.5829	0.0124945	0.675475	0.107586	5.81631	15	15	35	Infinity	100	Confident
C01R03	O88844	Isocitrate dehydrogenase [NADP] cytoplasmic (IDHC_MOUSE)	ENSMUSG00000025950	Idh1	1	GO:0008150, GO:0006091, GO:0006790, GO:0009056, GO:0048856, GO:0043167, GO:0009058, GO:0043226, GO:0005575, GO:0000003, GO:0003674, GO:0005622, GO:0006950, GO:0044281, GO:0005623, GO:0005777, GO:0005975, GO:0016491, GO:0005737, GO:0005739, GO:0006629, GO:0051186, GO:0005829, GO:0034641	carbohydrate metabolic process, catabolic process, cofactor metabolic process, biological_process, cytosol, organelle, peroxisome, cellular_component, cell, molecular_function, mitochondrion, cytoplasm, ion binding, cellular nitrogen compound metabolic process, generation of precursor metabolites and energy, biosynthetic process, response to stress, small molecule metabolic process, lipid metabol…	46.6445	92.51	16.43	16.43	50.7079	0.00966057	0.29155	0.0831843	2.51045	9	9	12	Infinity	100	Confident
C01R03	Q8K3J1	NADH dehydrogenase [ubiquinone] iron-sulfur protein 8, mitochondrial (NDUS8_MOUSE)	ENSMUSG00000059734	Ndufs8	19	GO:0008150, GO:0065003, GO:0006461, GO:0022607, GO:0043167, GO:0043234, GO:0043226, GO:0005575, GO:0003674, GO:0005622, GO:0006950, GO:0007005, GO:0005623, GO:0016491, GO:0005737, GO:0005739	mitochondrion organization, biological_process, cellular component assembly, organelle, macromolecular complex assembly, protein complex, cellular_component, cell, molecular_function, mitochondrion, cytoplasm, ion binding, response to stress, protein complex assembly, oxidoreductase activity, intracellular	24.0228	83.02	10.85	10.85	29.8236	0.00568182	0.0926009	0.0489244	0.797358	2	2	3	30.3014	86.5528	Doubtful
C01R03	Q505D7	Optic atrophy 3 protein homolog (OPA3_MOUSE)	ENSMUSG00000052214	Opa3	7	GO:0008150, GO:0048856, GO:0043226, GO:0005575, GO:0005622, GO:0003674, GO:0040007, GO:0007005, GO:0005623, GO:0005737, GO:0006629, GO:0005739, GO:0050877	mitochondrion organization, nervous system process, biological_process, organelle, cellular_component, cell, molecular_function, mitochondrion, cytoplasm, lipid metabolic process, growth, anatomical structure development, intracellular	20.0973	78.21	6.7	6.7	112.478	0.0214286	0.115884	0.184515	0.997842	1	1	3	Infinity	100	Doubtful
C01R03	O55125	Protein NipSnap homolog 1 (NIPS1_MOUSE)	ENSMUSG00000034285	Nipsnap1	11	GO:0005623, GO:0008150, GO:0005737, GO:0005739, GO:0043226, GO:0005575, GO:0050877, GO:0005886, GO:0005622, GO:0003674	cytoplasm, nervous system process, biological_process, plasma membrane, organelle, cell, cellular_component, intracellular, mitochondrion, molecular_function	33.342	79.93	20.07	14.44	89.9469	0.0171362	0.333521	0.147554	2.87185	6	6	12	Infinity	100	Confident
C01R03	Q9JKC6	Cell cycle exit and neuronal differentiation protein 1 (CEND_MOUSE)	ENSMUSG00000060240	Cend1	7	GO:0008283, GO:0008150, GO:0040011, GO:0048856, GO:0048646, GO:0021700, GO:0043226, GO:0005575, GO:0005622, GO:0003674, GO:0048870, GO:0005623, GO:0005737, GO:0005739, GO:0030154	cell differentiation, cell proliferation, biological_process, organelle, locomotion, anatomical structure formation involved in morphogenesis, cellular_component, cell, molecular_function, mitochondrion, developmental maturation, cell motility, cytoplasm, anatomical structure development, intracellular	14.9778	56.38	31.54	31.54	548.849	0.104563	1.05353	0.900365	9.07159	5	5	15	Infinity	100	Confident
C01R03	P47738	Aldehyde dehydrogenase, mitochondrial (ALDH2_MOUSE)	ENSMUSG00000029455	Aldh2	5	GO:0044281, GO:0005623, GO:0008150, GO:0005737, GO:0016491, GO:0009056, GO:0005739, GO:0043226, GO:0005575, GO:0005622, GO:0003674	cytoplasm, catabolic process, biological_process, small molecule metabolic process, organelle, oxidoreductase activity, cell, cellular_component, intracellular, mitochondrion, molecular_function	56.5018	68.98	24.28	24.28	96.3917	0.018364	0.457593	0.158127	3.9402	9	9	17	Infinity	100	Confident
C01R03	Q61335	B-cell receptor-associated protein 31 (BAP31_MOUSE)	ENSMUSG00000002015	Bcap31	X	GO:0008150, GO:0009056, GO:0007165, GO:0005794, GO:0005783, GO:0043234, GO:0043226, GO:0005575, GO:0006810, GO:0000003, GO:0005622, GO:0003674, GO:0005886, GO:0006950, GO:0005811, GO:0005623, GO:0008219, GO:0016192, GO:0005737, GO:0042592, GO:0005739, GO:0031410	lipid droplet, catabolic process, cell death, biological_process, signal transduction, plasma membrane, organelle, transport, protein complex, cellular_component, cell, molecular_function, mitochondrion, cytoplasm, cytoplasmic vesicle, response to stress, golgi apparatus, homeostatic process, intracellular, endoplasmic reticulum, reproduction, vesicle-mediated transport	27.939	76.33	4.08	4.08	21.4243	0.00408163	0.0624678	0.0351457	0.537892	2	2	2	Infinity	100	Doubtful
C01R03	Q9CWS0	N(G),N(G)-dimethylarginine dimethylaminohydrolase 1 (DDAH1_MOUSE)	ENSMUSG00000028194	Ddah1	3	GO:0016810, GO:0008283, GO:0008150, GO:0009056, GO:0048856, GO:0006464, GO:0043167, GO:0006520, GO:0048646, GO:0009058, GO:0043226, GO:0005575, GO:0003013, GO:0005622, GO:0006950, GO:0003674, GO:0044281, GO:0005623, GO:0005737, GO:0005739, GO:0034641	catabolic process, cellular amino acid metabolic process, cell proliferation, biological_process, organelle, anatomical structure formation involved in morphogenesis, hydrolase activity, acting on carbon-nitrogen (but not peptide) bonds, cellular_component, cell, molecular_function, mitochondrion, circulatory system process, cytoplasm, ion binding, cellular nitrogen compound metabolic process, bi…	31.3609	85.61	25.26	25.26	86.5095	0.0164813	0.519911	0.141915	4.4768	9	8	15	Infinity	100	Confident
C01R03	Q8K2B3	Succinate dehydrogenase [ubiquinone] flavoprotein subunit, mitochondrial (SDHA_MOUSE)	ENSMUSG00000021577	Sdha	13	GO:0008150, GO:0006091, GO:0043167, GO:0048856, GO:0043234, GO:0043226, GO:0005730, GO:0005575, GO:0003674, GO:0005622, GO:0044281, GO:0005634, GO:0005623, GO:0016491, GO:0005737, GO:0005739, GO:0034641	biological_process, organelle, nucleus, protein complex, cellular_component, cell, molecular_function, mitochondrion, cytoplasm, ion binding, cellular nitrogen compound metabolic process, generation of precursor metabolites and energy, small molecule metabolic process, nucleolus, oxidoreductase activity, anatomical structure development, intracellular	72.5392	77.11	18.83	18.83	46.1792	0.00879779	0.443512	0.0757551	3.81895	11	11	15	Infinity	100	Confident
C01R03	Q11011	Puromycin-sensitive aminopeptidase (PSA_MOUSE)	ENSMUSG00000001441	Npepps	11	GO:0008150, GO:0009056, GO:0043167, GO:0008233, GO:0043226, GO:0006810, GO:0005575, GO:0007005, GO:0006950, GO:0005622, GO:0003674, GO:0006605, GO:0005634, GO:0005623, GO:0005737, GO:0005829, GO:0034641	mitochondrion organization, catabolic process, biological_process, cytosol, organelle, nucleus, peptidase activity, transport, cellular_component, cell, molecular_function, cytoplasm, ion binding, cellular nitrogen compound metabolic process, response to stress, protein targeting, intracellular	103.26	68.26	12.72	12.72	38.2182	0.0072811	0.274275	0.0626954	2.3617	16	16	26	Infinity	100	Confident
C01R03	P35700	Peroxiredoxin-1 (PRDX1_MOUSE)	ENSMUSG00000028691	Prdx1	4	GO:0008283, GO:0008150, GO:0009056, GO:0007165, GO:0006464, GO:0005576, GO:0043226, GO:0005575, GO:0006810, GO:0005622, GO:0006950, GO:0002376, GO:0003674, GO:0006605, GO:0006913, GO:0005623, GO:0005634, GO:0016491, GO:0005737, GO:0042592, GO:0005739, GO:0051186, GO:0005829	catabolic process, cofactor metabolic process, cell proliferation, biological_process, signal transduction, cytosol, organelle, extracellular region, nucleus, transport, cellular_component, cell, molecular_function, mitochondrion, cytoplasm, response to stress, protein targeting, nucleocytoplasmic transport, cellular protein modification process, immune system process, oxidoreductase activity, ho…	22.1624	100	37.19	37.19	140.299	0.0267289	1.22754	0.230154	10.57	8	8	19	Infinity	100	Confident
C01R03	Q2TPA8	Hydroxysteroid dehydrogenase-like protein 2 (HSDL2_MOUSE)	ENSMUSG00000028383	Hsdl2	4	GO:0005777, GO:0008150, GO:0005623, GO:0005737, GO:0016491, GO:0005739, GO:0043226, GO:0005575, GO:0003674, GO:0005622	cytoplasm, biological_process, organelle, peroxisome, oxidoreductase activity, cell, cellular_component, intracellular, mitochondrion, molecular_function	54.1739	80	2.04	2.04	58.4516	0.0111359	0.0471285	0.0958875	0.40581	2	2	7	Infinity	100	Doubtful
C01R03	P17665	Cytochrome c oxidase subunit 7C, mitochondrial (COX7C_MOUSE)	ENSMUSG00000017778	Cox7c	13	GO:0008150, GO:0006091, GO:0055085, GO:0022857, GO:0043234, GO:0043226, GO:0006810, GO:0005575, GO:0003674, GO:0005622, GO:0044281, GO:0005623, GO:0005737, GO:0016491, GO:0005739, GO:0034641	biological_process, transmembrane transporter activity, organelle, transport, protein complex, cellular_component, cell, molecular_function, mitochondrion, cytoplasm, transmembrane transport, cellular nitrogen compound metabolic process, generation of precursor metabolites and energy, small molecule metabolic process, oxidoreductase activity, intracellular	7.32788	100	14.29	14.29	166.634	0.031746	0.258925	0.273356	2.22953	2	2	3	Infinity	100	Doubtful
C01R03	P16330	2',3'-cyclic-nucleotide 3'-phosphodiesterase (CN37_MOUSE)	ENSMUSG00000006782	Cnp	11	GO:0007010, GO:0009056, GO:0048856, GO:0043226, GO:0005576, GO:0005575, GO:0003674, GO:0005654, GO:0044281, GO:0005623, GO:0003723, GO:0005829, GO:0031410, GO:0034641, GO:0008150, GO:0061024, GO:0000902, GO:0007568, GO:0006810, GO:0005886, GO:0005622, GO:0007005, GO:0005634, GO:0005615, GO:0005856, GO:0005737, GO:0005739, GO:0030154, GO:0034655	nucleoplasm, cell differentiation, extracellular region, cellular_component, cell, rna binding, molecular_function, cytoplasm, cellular nitrogen compound metabolic process, membrane organization, cell morphogenesis, extracellular space, mitochondrion organization, catabolic process, nucleobase-containing compound catabolic process, cytoskeleton organization, cytosol, biological_process, plasma me…	47.0935	85.24	35.48	35.48	126.341	0.0240696	0.726983	0.207257	6.25983	14	14	33	Infinity	100	Confident
C01R03	Q8BH95	Enoyl-CoA hydratase, mitochondrial (ECHM_MOUSE)	ENSMUSG00000025465	Echs1	7	GO:0044281, GO:0005623, GO:0008150, GO:0009056, GO:0005737, GO:0006629, GO:0005739, GO:0016829, GO:0043226, GO:0005575, GO:0005622, GO:0003674	cytoplasm, catabolic process, biological_process, small molecule metabolic process, organelle, lipid metabolic process, lyase activity, cell, cellular_component, intracellular, mitochondrion, molecular_function	31.4542	77.24	11.72	11.72	61.9956	0.011811	0.136464	0.101701	1.17505	2	2	4	Infinity	100	Confident
C01R03	P35486	Pyruvate dehydrogenase E1 component subunit alpha, somatic form, mitochondrial (ODPA_MOUSE)	ENSMUSG00000031299	Pdha1	X	GO:0008150, GO:0006091, GO:0006790, GO:0009058, GO:0005730, GO:0043226, GO:0005575, GO:0003674, GO:0005622, GO:0044281, GO:0005634, GO:0005623, GO:0005975, GO:0016491, GO:0005737, GO:0051186, GO:0005739, GO:0034641	carbohydrate metabolic process, cofactor metabolic process, biological_process, organelle, nucleus, cellular_component, cell, molecular_function, mitochondrion, cytoplasm, cellular nitrogen compound metabolic process, generation of precursor metabolites and energy, biosynthetic process, small molecule metabolic process, sulfur compound metabolic process, nucleolus, oxidoreductase activity, intrac…	43.2036	75.9	22.56	22.56	113.926	0.0217045	0.501311	0.186891	4.31664	12	12	27	Infinity	100	Confident
C01R03	Q61171	Peroxiredoxin-2 (PRDX2_MOUSE)	ENSMUSG00000005161	Prdx2	8	GO:0008283, GO:0008150, GO:0007165, GO:0009056, GO:0048856, GO:0006464, GO:0007155, GO:0009058, GO:0043226, GO:0005575, GO:0005622, GO:0003674, GO:0002376, GO:0006950, GO:0005623, GO:0008219, GO:0016491, GO:0005737, GO:0042592, GO:0005739, GO:0051186, GO:0030154, GO:0005829, GO:0034641	catabolic process, cell differentiation, cofactor metabolic process, cell proliferation, cell death, biological_process, signal transduction, cytosol, organelle, cellular_component, cell, molecular_function, mitochondrion, cytoplasm, cellular nitrogen compound metabolic process, biosynthetic process, response to stress, cell adhesion, cellular protein modification process, immune system process, …	21.7651	67.68	31.82	31.82	104.324	0.0198751	1.33572	0.171139	11.5015	7	7	9	Infinity	100	Confident
C01R03	Q62465	Synaptic vesicle membrane protein VAT-1 homolog (VAT1_MOUSE)	ENSMUSG00000034993	Vat1	11	GO:0061024, GO:0008150, GO:0043167, GO:0048856, GO:0043226, GO:0005575, GO:0003674, GO:0005622, GO:0007005, GO:0005623, GO:0005737, GO:0016491, GO:0005739	mitochondrion organization, biological_process, organelle, cellular_component, cell, molecular_function, mitochondrion, cytoplasm, ion binding, membrane organization, oxidoreductase activity, anatomical structure development, intracellular	43.069	62.07	14.53	14.53	58.2169	0.0110911	0.321941	0.0955024	2.77214	5	5	7	Infinity	100	Confident
C01R03	Q9D6R2	Isocitrate dehydrogenase [NAD] subunit alpha, mitochondrial (IDH3A_MOUSE)	ENSMUSG00000032279	Idh3a	9	GO:0044281, GO:0008150, GO:0005623, GO:0006091, GO:0005737, GO:0016491, GO:0005739, GO:0043167, GO:0043226, GO:0005575, GO:0005622, GO:0003674	cytoplasm, ion binding, generation of precursor metabolites and energy, biological_process, small molecule metabolic process, organelle, oxidoreductase activity, cell, cellular_component, intracellular, mitochondrion, molecular_function	39.6131	72.68	36.07	36.07	169.903	0.032369	1.28546	0.27872	11.0687	15	15	30	Infinity	100	Confident
C01R03	O08553	Dihydropyrimidinase-related protein 2 (DPYL2_MOUSE)	ENSMUSG00000022048	Dpysl2	14	GO:0016810, GO:0008150, GO:0007010, GO:0040011, GO:0000902, GO:0048856, GO:0043226, GO:0006810, GO:0005575, GO:0005886, GO:0040007, GO:0005622, GO:0003674, GO:0005623, GO:0005856, GO:0016192, GO:0005737, GO:0005739, GO:0030154, GO:0005829, GO:0008092, GO:0019899	enzyme binding, cell differentiation, cytoskeleton organization, biological_process, plasma membrane, cytoskeleton, cytosol, organelle, locomotion, hydrolase activity, acting on carbon-nitrogen (but not peptide) bonds, transport, cellular_component, cell, molecular_function, mitochondrion, cytoplasm, cell morphogenesis, growth, cytoskeletal protein binding, anatomical structure development, intra…	62.2386	82.34	61.89	61.89	171.273	0.0326299	1.59294	0.280966	13.7164	25	20	79	Infinity	100	Confident
[truncated: 1,670 more rows]

## Sheet: Complete proteome MPTP
Sample ID	Main Accession	Description	Ensembl Gene ID	Gene Name	Chromosome	GO Accession	GO Description	MW [kDa]	Possible Coverage [%]	Coverage [%]	Confident Coverage [%]	Spectrum Counting	Spectrum Counting NSAF	Spectrum Counting emPAI	Spectrum Counting NSAF [%]	Spectrum Counting emPAI [%]	#Peptides	#Unique	#PSMs	Score	Confidence [%]	Validation
[truncated: 2,165 more rows]

## Sheet: Complete proteome MPTP+Isatin
Sample ID	Main Accession	Description	Ensembl Gene ID	Gene Name	Chromosome	GO Accession	GO Description	MW [kDa]	Possible Coverage [%]	Coverage [%]	Confident Coverage [%]	Spectrum Counting	Spectrum Counting NSAF	Spectrum Counting emPAI	Spectrum Counting NSAF [%]	Spectrum Counting emPAI [%]	#Peptides	#Unique	#PSMs	Score	Confidence [%]	Validation
[truncated: 1,771 more rows]

[truncated: 7 more sheets: Complete proteome Isatin, Mitochondrial proteins total, Total List of UBQ Proteins, UBQ Mitochondrial proteins, Summary, Oxidized proteins, Oxidized mitochondrial proteins]
